# Supplementary material for: Telomerase subunit Est2 marks internal sites that are prone to accumulate DNA damage
Source: BMC Biol. 2021 Nov 20;19:247. doi: 10.1186/s12915-021-01167-1 (PMC8605574; doi:10.1186/s12915-021-01167-1)
Supplement: Supplementary file 1 — Additional file 1: Supplementary Table S1. Genomic coordinates of NTBS regions discovered in at least three out of five independent ChIP-chip experiments. [file 12915_2021_1167_MOESM1_ESM.xlsx]

## Sheet: Sheet1
Chromosome	Start	End	Length	WT coverage
chr1	12050	12549	500	4
chr1	31850	32749	900	3
chr1	38250	38649	400	3
chr1	44050	44249	200	3
chr1	46350	46849	500	3
chr1	56950	57249	300	3
chr1	59350	59649	300	4
chr1	60850	61049	200	3
chr1	61450	61649	200	4
chr1	62050	62549	500	5
chr1	68850	69049	200	3
chr1	69350	69649	300	3
chr1	75150	75449	300	3
chr1	75850	76249	400	3
chr1	83650	83749	100	4
chr1	83950	84249	300	4
chr1	100750	100849	100	3
chr1	106650	107349	700	3
chr1	108050	108449	400	3
chr1	109150	109949	800	3
chr1	112050	112149	100	3
chr1	112250	112449	200	3
chr1	112550	112649	100	4
chr1	113350	113449	100	3
chr1	113550	113649	100	3
chr1	113750	113849	100	3
chr1	114850	114949	100	3
chr1	115250	115749	500	3
chr1	116350	116449	100	3
chr1	119350	119649	300	4
chr1	128850	129049	200	3
chr1	129350	129449	100	3
chr1	130050	130349	300	3
chr1	139950	140449	500	4
chr1	140950	141249	300	3
chr1	142850	142949	100	3
chr1	149650	149749	100	3
chr1	192950	193049	100	5
chr1	194150	194349	200	4
chr1	195050	195349	300	3
chr1	72850	73049	200	5
chr10	62000	62299	300	3
chr10	62900	63099	200	3
chr10	80900	81099	200	3
chr10	93900	94099	200	3
chr10	94200	94599	400	4
chr10	147100	147399	300	4
chr10	166500	166799	300	3
chr10	168200	168399	200	4
chr10	171600	171699	100	3
chr10	178200	178299	100	3
chr10	289500	290099	600	3
chr10	314900	315099	200	3
chr10	315700	316099	400	3
chr10	332600	332799	200	4
chr10	338300	338699	400	4
chr10	361200	361599	400	3
chr10	366200	366299	100	3
chr10	399900	399999	100	3
chr10	411700	411999	300	3
chr10	420100	420299	200	3
chr10	426100	426299	200	3
chr10	443700	443999	300	3
chr10	464300	464599	300	4
chr10	464900	465699	800	5
chr10	466900	466999	100	4
chr10	467200	467699	500	3
chr10	469900	470499	600	3
chr10	519400	519599	200	3
chr10	524000	524199	200	3
chr10	532300	532399	100	3
chr10	547000	547299	300	3
chr10	548700	548799	100	3
chr10	548900	549099	200	3
chr10	555200	555299	100	3
chr10	571000	571099	100	3
chr10	571300	571899	600	3
chr10	573100	573199	100	3
chr10	577900	577999	100	3
chr10	578600	578799	200	3
chr10	595100	595299	200	3
chr10	621200	621499	300	3
chr10	622100	622499	400	4
chr10	623600	624199	600	3
chr10	635600	635799	200	3
chr10	638300	638499	200	4
chr10	663900	664299	400	3
chr10	703900	704099	200	4
chr10	704700	704899	200	4
chr10	714300	714999	700	4
chr10	572100	572299	200	5
chr11	17450	17949	500	4
chr11	23050	23549	500	3
chr11	33950	34149	200	3
chr11	39550	39749	200	3
chr11	101550	101749	200	3
chr11	102750	103249	500	5
chr11	106050	106149	100	4
chr11	108350	108749	400	3
chr11	118050	118149	100	3
chr11	145750	146049	300	3
chr11	164950	165249	300	3
chr11	169650	170849	1200	3
chr11	226750	226949	200	3
chr11	246150	246649	500	3
chr11	275250	275749	500	3
chr11	279150	279449	300	4
chr11	280250	280449	200	3
chr11	283150	283449	300	3
chr11	283550	284049	500	4
chr11	311050	311249	200	3
chr11	327050	327149	100	5
chr11	334350	334649	300	3
chr11	336550	336849	300	3
chr11	339950	340149	200	3
chr11	369750	369849	100	3
chr11	380050	380249	200	4
chr11	380550	380749	200	4
chr11	381350	381449	100	3
chr11	383750	384049	300	3
chr11	387550	387749	200	4
chr11	391750	391949	200	3
chr11	463650	463849	200	4
chr11	464450	464549	100	5
chr11	511750	511849	100	3
chr11	522850	523049	200	3
chr11	524050	524649	600	4
chr11	525950	526149	200	3
chr11	527150	527249	100	3
chr11	527350	528549	1200	3
chr11	528850	529049	200	3
chr11	529150	529349	200	3
chr11	615350	615649	300	3
chr11	635750	636049	300	3
chr11	646750	646849	100	4
chr11	648050	648249	200	3
chr11	259350	259449	100	3
chr12	15000	15099	100	3
chr12	21100	21599	500	3
chr12	95500	95899	400	4
chr12	103700	103899	200	3
chr12	104000	104199	200	3
chr12	105700	105899	200	3
chr12	107100	107399	300	3
chr12	107600	107699	100	3
chr12	113600	113799	200	3
chr12	132400	132499	100	3
chr12	132800	132899	100	4
chr12	178000	178299	300	3
chr12	195900	196099	200	3
chr12	201900	202199	300	3
chr12	233800	234099	300	3
chr12	242700	242799	100	4
chr12	252100	252699	600	3
chr12	259900	260299	400	3
chr12	261800	262099	300	3
chr12	263700	264199	500	3
chr12	324100	324399	300	3
chr12	328400	328499	100	3
chr12	328700	328999	300	4
chr12	340600	340899	300	3
chr12	342200	342399	200	3
chr12	343400	343599	200	4
chr12	351000	351299	300	3
chr12	375000	375399	400	3
chr12	389700	390399	700	3
chr12	411100	411499	400	4
chr12	417900	418199	300	3
chr12	419900	420299	400	3
chr12	440600	441399	800	3
chr12	445900	446499	600	3
chr12	506400	506699	300	3
chr12	511400	511599	200	3
chr12	515600	515799	200	3
chr12	516200	516299	100	4
chr12	535800	535999	200	3
chr12	546700	546799	100	3
chr12	555400	555899	500	4
chr12	567000	567399	400	3
chr12	611800	611999	200	3
chr12	613300	613399	100	3
chr12	647100	648099	1000	3
chr12	659300	659499	200	3
chr12	703500	703799	300	3
chr12	729900	729999	100	3
chr12	736300	737099	800	3
chr12	763900	764099	200	3
chr12	771600	771799	200	3
chr12	778400	778499	100	3
chr12	790900	790999	100	4
chr12	810200	810399	200	3
chr12	814600	814899	300	3
chr12	815100	815299	200	3
chr12	827200	827599	400	4
chr12	829800	829999	200	3
chr12	875700	875999	300	3
chr12	878800	879199	400	4
chr12	879800	880199	400	3
chr12	883400	883499	100	3
chr12	919500	919699	200	3
chr12	923100	923399	300	3
chr12	937700	937999	300	4
chr12	951200	951499	300	4
chr12	954500	954699	200	3
chr12	992100	992199	100	3
chr12	999800	999899	100	3
chr12	1002800	1003099	300	3
chr12	1010700	1010899	200	3
chr12	1011800	1011999	200	3
chr12	1013000	1013199	200	5
chr12	1013300	1013499	200	5
chr12	1013700	1013899	200	3
chr12	1014800	1015299	500	3
chr12	1031900	1032099	200	4
chr12	1038200	1038599	400	4
chr12	806500	806799	300	5
chr12	369200	369399	200	3
chr12	837700	837999	300	3
chr13	16000	16199	200	3
chr13	20100	20299	200	3
chr13	23000	23099	100	3
chr13	45200	45499	300	3
chr13	53400	53499	100	3
chr13	68800	68899	100	3
chr13	86500	86799	300	3
chr13	92200	92499	300	3
chr13	95700	95899	200	3
chr13	100700	100799	100	3
chr13	119800	119999	200	3
chr13	120200	120799	600	4
chr13	123400	123599	200	3
chr13	146800	147099	300	3
chr13	157200	157899	700	3
chr13	162400	162799	400	3
chr13	170800	170999	200	4
chr13	210300	210399	100	3
chr13	222900	223199	300	3
chr13	241900	242299	400	3
chr13	248300	248399	100	4
chr13	250600	250699	100	4
chr13	272200	272699	500	3
chr13	279000	279499	500	4
chr13	282200	282399	200	3
chr13	304900	305199	300	3
chr13	352800	352999	200	4
chr13	354200	354299	100	4
chr13	389400	389599	200	3
chr13	464300	464499	200	3
chr13	470200	470499	300	4
chr13	476800	476899	100	3
chr13	484300	484499	200	3
chr13	484600	484799	200	5
chr13	485000	485199	200	3
chr13	491500	491599	100	3
chr13	493000	493099	100	3
chr13	534300	534499	200	3
chr13	539700	539899	200	4
chr13	546500	546799	300	3
chr13	588500	588799	300	3
chr13	593600	593699	100	3
chr13	624400	624599	200	3
chr13	627100	627699	600	3
chr13	644500	644599	100	3
chr13	667500	667899	400	3
chr13	668000	668199	200	3
chr13	673700	674099	400	5
chr13	676100	676499	400	3
chr13	695800	695899	100	3
chr13	700600	700999	400	3
chr13	702200	702499	300	3
chr13	723000	723099	100	3
chr13	726800	727099	300	3
chr13	735300	735699	400	3
chr13	757700	757799	100	3
chr13	771300	771399	100	3
chr13	818500	818599	100	3
chr13	820400	820699	300	3
chr13	820900	821099	200	3
chr13	859700	859999	300	3
chr13	860200	860299	100	3
chr13	862200	862499	300	3
chr13	873600	873999	400	4
chr13	874100	874199	100	3
chr13	879000	879499	500	3
chr13	888200	888499	300	5
chr13	891100	891399	300	3
chr13	908600	908999	400	4
chr13	911200	911799	600	3
chr13	250400	250599	200	4
chr13	703100	703499	400	3
chr14	26000	26599	600	3
chr14	33700	34399	700	4
chr14	34900	35099	200	3
chr14	36700	36899	200	3
chr14	53500	53599	100	3
chr14	59300	59499	200	3
chr14	65900	66199	300	4
chr14	88400	88899	500	4
chr14	106000	106099	100	3
chr14	109700	109799	100	3
chr14	115400	115999	600	3
chr14	118000	118299	300	3
chr14	172900	173199	300	3
chr14	173300	173499	200	3
chr14	187900	187999	100	3
chr14	188400	188599	200	3
chr14	189900	190399	500	3
chr14	190600	190699	100	3
chr14	195500	195799	300	3
chr14	199000	199499	500	5
chr14	242200	242399	200	3
chr14	268000	268399	400	3
chr14	275000	275099	100	4
chr14	318200	318499	300	3
chr14	344100	344299	200	3
chr14	346000	346099	100	3
chr14	347500	347799	300	3
chr14	350500	350599	100	3
chr14	358000	358699	700	3
chr14	367800	367899	100	3
chr14	391300	391599	300	3
chr14	394100	394199	100	4
chr14	408900	409099	200	3
chr14	414000	414299	300	4
chr14	414400	414599	200	3
chr14	428000	428199	200	3
chr14	477100	477299	200	3
chr14	477500	477599	100	3
chr14	477700	477999	300	3
chr14	480000	480299	300	3
chr14	489500	489699	200	3
chr14	490600	490699	100	3
chr14	491900	492499	600	3
chr14	504200	504599	400	3
chr14	506400	506599	200	3
chr14	518600	518799	200	3
chr14	530100	530399	300	3
chr14	531100	531299	200	4
chr14	558300	558399	100	3
chr14	579900	579999	100	4
chr14	603800	604099	300	3
chr14	642000	642199	200	3
chr14	651200	651299	100	3
chr14	653700	653899	200	3
chr14	654800	654999	200	3
chr14	655600	656299	700	4
chr14	664600	664899	300	3
chr14	693800	694099	300	3
chr14	694700	694899	200	3
chr14	704400	704599	200	4
chr14	707600	707899	300	3
chr14	709000	709199	200	3
chr14	715200	715399	200	3
chr14	733600	733799	200	3
chr14	570700	571299	600	4
chr15	20050	20149	100	3
chr15	20750	21049	300	3
chr15	30250	30449	200	5
chr15	34750	35149	400	3
chr15	54050	54349	300	3
chr15	74550	74949	400	3
chr15	75250	75349	100	3
chr15	80650	80749	100	3
chr15	162450	162649	200	3
chr15	197650	197949	300	3
chr15	198250	198549	300	3
chr15	202250	202349	100	3
chr15	203450	204049	600	3
chr15	207550	207849	300	3
chr15	212650	212849	200	3
chr15	213050	213249	200	3
chr15	219650	219849	200	3
chr15	254450	254749	300	4
chr15	268950	269749	800	3
chr15	286850	286949	100	3
chr15	290050	290149	100	4
chr15	318650	319149	500	3
chr15	341450	341949	500	3
chr15	344650	344949	300	3
chr15	346650	346749	100	4
chr15	377350	377549	200	3
chr15	381850	382149	300	3
chr15	409250	409449	200	3
chr15	428050	428449	400	3
chr15	455950	456249	300	3
chr15	457350	457449	100	3
chr15	460450	460649	200	3
chr15	479850	480149	300	4
chr15	482750	482849	100	3
chr15	493750	494049	300	3
chr15	509450	509649	200	3
chr15	536650	536849	200	4
chr15	542850	543449	600	3
chr15	559350	559749	400	3
chr15	588750	589049	300	3
chr15	622950	623349	400	3
chr15	628550	628849	300	3
chr15	677050	677849	800	4
chr15	688850	688949	100	3
chr15	761950	762149	200	3
chr15	771450	771549	100	3
chr15	798150	798449	300	4
chr15	805950	806049	100	3
chr15	829450	829549	100	3
chr15	831550	831749	200	3
chr15	833850	834049	200	4
chr15	861450	861649	200	3
chr15	863050	863249	200	3
chr15	880050	880149	100	3
chr15	919750	919849	100	3
chr15	921750	921949	200	3
chr15	925950	926049	100	3
chr15	942850	942949	100	4
chr15	956250	956649	400	3
chr15	1008350	1008549	200	3
chr15	1011350	1011749	400	4
chr15	1018050	1018349	300	3
chr15	1018650	1018849	200	3
chr15	1060550	1060749	200	4
chr15	1069750	1069949	200	3
chr15	480950	481049	100	5
chr15	344950	345349	400	5
chr15	29750	29949	200	4
chr15	236250	236449	200	4
chr15	271150	271249	100	4
chr16	47600	48599	1000	3
chr16	75600	76199	600	3
chr16	83700	84499	800	3
chr16	107700	107899	200	3
chr16	111700	113099	1400	3
chr16	115800	115999	200	3
chr16	124500	124999	500	3
chr16	133300	133899	600	3
chr16	203700	203999	300	3
chr16	226900	227199	300	3
chr16	228900	229199	300	4
chr16	266400	266699	300	3
chr16	278200	278999	800	3
chr16	296200	296399	200	3
chr16	303400	303599	200	4
chr16	311000	311399	400	3
chr16	350800	350899	100	3
chr16	371600	371999	400	4
chr16	372400	372799	400	3
chr16	380300	380399	100	3
chr16	387200	387399	200	4
chr16	389200	389699	500	3
chr16	393400	393899	500	3
chr16	464600	464999	400	3
chr16	498400	498499	100	3
chr16	505000	505499	500	3
chr16	539400	539499	100	3
chr16	553600	553699	100	3
chr16	574600	574699	100	3
chr16	610900	611099	200	3
chr16	628200	628299	100	3
chr16	642800	642899	100	4
chr16	644500	644999	500	5
chr16	646700	646899	200	3
chr16	647500	647699	200	3
chr16	649400	649799	400	3
chr16	665600	665799	200	3
chr16	752900	752999	100	3
chr16	753500	753699	200	3
chr16	811000	811299	300	4
chr16	830000	830199	200	5
chr16	832200	832499	300	4
chr16	869300	869799	500	3
chr16	875700	875899	200	3
chr16	886500	886599	100	3
chr16	893300	893399	100	4
chr16	898500	898799	300	3
chr16	899000	899599	600	3
chr16	900300	900499	200	3
chr16	900700	901299	600	3
chr16	433800	433899	100	4
chr2	67600	67699	100	3
chr2	68400	68699	300	3
chr2	70100	70299	200	3
chr2	70900	71199	300	4
chr2	72200	72299	100	3
chr2	72600	72999	400	4
chr2	81300	81499	200	3
chr2	106000	106199	200	3
chr2	122800	123299	500	3
chr2	130600	130799	200	3
chr2	145400	145499	100	3
chr2	163700	164099	400	3
chr2	169100	169299	200	4
chr2	178100	178399	300	3
chr2	180300	180499	200	3
chr2	181700	181999	300	3
chr2	182700	183099	400	3
chr2	202500	202799	300	3
chr2	215700	215799	100	3
chr2	235600	235899	300	5
chr2	257800	257899	100	3
chr2	268300	268499	200	3
chr2	269800	270399	600	3
chr2	299900	300399	500	3
chr2	309700	309899	200	3
chr2	334800	335099	300	3
chr2	377500	378199	700	4
chr2	380500	380799	300	3
chr2	382500	382599	100	3
chr2	389000	389199	200	3
chr2	393400	394199	800	3
chr2	395500	395699	200	4
chr2	412500	412599	100	3
chr2	414300	414499	200	5
chr2	428600	428699	100	4
chr2	429800	430599	800	3
chr2	455300	455499	200	3
chr2	463000	463799	800	4
chr2	475400	475499	100	3
chr2	482400	482599	200	3
chr2	482800	482999	200	3
chr2	492200	492599	400	3
chr2	503600	504199	600	3
chr2	563600	563799	200	4
chr2	564000	564099	100	4
chr2	577700	577799	100	3
chr2	612500	612899	400	3
chr2	613500	613699	200	3
chr2	616400	616699	300	3
chr2	639800	639899	100	3
chr2	660400	660999	600	3
chr2	661700	661999	300	3
chr2	699200	699799	600	3
chr2	701600	701899	300	3
chr2	703200	703299	100	4
chr2	703600	703999	400	3
chr2	734900	735999	1100	3
chr2	736500	737099	600	3
chr2	739000	739299	300	3
chr2	740100	740799	700	3
chr2	775800	776199	400	3
chr2	777300	777399	100	3
chr2	780400	780599	200	3
chr2	782100	782299	200	3
chr2	464000	464199	200	5
chr2	128400	128599	200	3
chr3	28700	28899	200	3
chr3	32600	32899	300	3
chr3	49000	49999	1000	3
chr3	50700	51199	500	5
chr3	53900	54099	200	3
chr3	60400	60599	200	3
chr3	63000	63299	300	4
chr3	66400	66799	400	3
chr3	69600	69799	200	3
chr3	70800	71199	400	4
chr3	77400	77699	300	3
chr3	93100	93699	600	3
chr3	102100	102499	400	4
chr3	104800	105199	400	4
chr3	106000	106299	300	3
chr3	156200	156499	300	3
chr3	164500	164599	100	3
chr3	189800	190199	400	3
chr3	209300	209499	200	3
chr3	210700	211399	700	3
chr3	212000	212299	300	3
chr3	213100	213299	200	3
chr3	214000	214299	300	4
chr3	216400	216699	300	3
chr3	216800	216999	200	3
chr3	222000	222599	600	3
chr3	226300	226399	100	3
chr3	226600	226899	300	4
chr3	242600	243499	900	3
chr3	249500	249799	300	4
chr3	251500	251899	400	4
chr3	253600	253899	300	3
chr3	266200	266499	300	3
chr3	268800	269099	300	3
chr3	269900	269999	100	3
chr3	271800	271899	100	3
chr3	279500	279699	200	3
chr3	283400	283599	200	3
chr3	304400	304599	200	4
chr3	226400	226599	200	4
chr3	11300	11799	500	3
chr4	18000	18199	200	3
chr4	43200	43299	100	3
chr4	54800	55199	400	3
chr4	59800	60099	300	3
chr4	62700	62999	300	4
chr4	67000	67199	200	4
chr4	122900	123199	300	3
chr4	125900	126299	400	3
chr4	133800	133999	200	3
chr4	145900	146199	300	3
chr4	148400	148699	300	3
chr4	149300	149899	600	3
chr4	151200	151399	200	3
chr4	151500	151599	100	3
chr4	176100	176199	100	3
chr4	195600	195799	200	3
chr4	197400	197599	200	3
chr4	206000	206599	600	5
chr4	231200	231599	400	3
chr4	265600	265699	100	3
chr4	285900	286499	600	3
chr4	288000	288299	300	4
chr4	301900	301999	100	3
chr4	342900	343299	400	3
chr4	351900	352099	200	3
chr4	384600	384999	400	3
chr4	390400	390499	100	3
chr4	393300	393499	200	3
chr4	458500	458799	300	3
chr4	461200	461499	300	3
chr4	484500	484799	300	4
chr4	526100	526299	200	3
chr4	546900	547099	200	3
chr4	550000	550199	200	3
chr4	564100	564499	400	3
chr4	601700	601799	100	3
chr4	633600	634199	600	3
chr4	635900	636199	300	3
chr4	677800	677999	200	3
chr4	692500	692699	200	3
chr4	695000	695299	300	3
chr4	697700	697999	300	4
chr4	709000	709099	100	3
chr4	724600	724699	100	3
chr4	742300	742599	300	3
chr4	743100	743199	100	3
chr4	759500	759699	200	3
chr4	768400	768899	500	3
chr4	806600	807099	500	3
chr4	808600	808799	200	3
chr4	809600	809899	300	3
chr4	834200	834399	200	3
chr4	836900	837799	900	5
chr4	842800	842899	100	3
chr4	864500	864699	200	5
chr4	867400	867599	200	3
chr4	868500	868699	200	3
chr4	927900	928099	200	4
chr4	928700	928899	200	3
chr4	931500	932099	600	3
chr4	932200	932699	500	3
chr4	939300	939399	100	3
chr4	955400	955699	300	3
chr4	968500	968699	200	3
chr4	1002800	1003199	400	3
chr4	1024200	1024399	200	3
chr4	1089300	1089699	400	3
chr4	1183600	1183799	200	4
chr4	1237500	1238099	600	4
chr4	1239400	1239999	600	3
chr4	1253400	1253799	400	4
chr4	1280400	1280499	100	4
chr4	1291600	1291699	100	4
chr4	1293300	1293499	200	3
chr4	1307200	1307299	100	3
chr4	1335600	1335799	200	3
chr4	1344300	1344599	300	5
chr4	1345900	1346099	200	3
chr4	1410400	1410699	300	3
chr4	1413000	1413099	100	3
chr4	1419600	1419899	300	3
chr4	1429500	1430199	700	3
chr4	1442800	1442999	200	3
chr4	1444800	1445299	500	3
chr4	1460100	1460299	200	3
chr4	1467300	1467599	300	3
chr4	1467800	1467899	100	3
chr4	1475300	1475399	100	3
chr4	1478100	1478299	200	5
chr4	1308400	1308599	200	5
chr4	1307700	1307999	300	5
chr5	43500	43699	200	4
chr5	44000	44199	200	4
chr5	49300	49399	100	3
chr5	52800	53099	300	3
chr5	72900	73099	200	3
chr5	79000	79499	500	5
chr5	81500	82299	800	3
chr5	86900	87299	400	3
chr5	119000	119199	200	3
chr5	159900	160099	200	3
chr5	190100	190199	100	3
chr5	236000	236299	300	3
chr5	236800	236999	200	4
chr5	257400	257499	100	3
chr5	265300	265399	100	4
chr5	268000	268199	200	3
chr5	280500	280599	100	4
chr5	285600	286199	600	3
chr5	323500	323699	200	3
chr5	333600	333699	100	3
chr5	333800	334199	400	4
chr5	334400	335699	1300	3
chr5	340200	340699	500	4
chr5	341400	341599	200	3
chr5	350800	351099	300	3
chr5	379600	379899	300	3
chr5	381600	381899	300	3
chr5	413800	413899	100	3
chr5	425000	425399	400	3
chr5	427800	428099	300	3
chr5	460900	461199	300	3
chr5	464000	464399	400	3
chr5	468700	468799	100	3
chr5	475200	475499	300	5
chr5	475600	475799	200	3
chr5	511500	511899	400	3
chr5	544900	544999	100	4
chr5	545200	545499	300	3
chr5	546100	546199	100	3
chr6	34800	34999	200	3
chr6	35200	35599	400	3
chr6	44900	45399	500	3
chr6	52600	52899	300	3
chr6	56400	57199	800	3
chr6	72300	72799	500	3
chr6	75300	75799	500	4
chr6	76600	76999	400	3
chr6	91400	91799	400	3
chr6	93800	94399	600	5
chr6	105300	105499	200	5
chr6	112500	112699	200	3
chr6	163600	163799	200	3
chr6	189200	189399	200	3
chr6	195700	195899	200	3
chr6	208500	208799	300	3
chr6	210700	211399	700	3
chr6	211500	211699	200	3
chr6	223400	223699	300	3
chr6	224300	224899	600	4
chr6	227700	228199	500	3
chr6	228600	228799	200	3
chr6	240600	240899	300	4
chr6	248900	248999	100	3
chr6	250200	250499	300	3
chr6	115400	115499	100	3
chr7	10250	10849	600	3
chr7	22950	23149	200	3
chr7	24150	24849	700	3
chr7	40250	40649	400	3
chr7	41950	42349	400	3
chr7	54950	55149	200	4
chr7	55550	55649	100	3
chr7	57250	57349	100	3
chr7	57950	58149	200	3
chr7	75150	75349	200	3
chr7	83450	83749	300	3
chr7	85550	85849	300	3
chr7	92050	92149	100	3
chr7	93350	93549	200	3
chr7	108750	109049	300	3
chr7	143650	143749	100	3
chr7	189450	189549	100	3
chr7	191550	191749	200	3
chr7	198450	198749	300	3
chr7	225050	225249	200	3
chr7	227150	227349	200	3
chr7	270450	270649	200	4
chr7	271150	271849	700	4
chr7	272850	273249	400	4
chr7	273950	274049	100	3
chr7	279550	279749	200	3
chr7	308250	308649	400	3
chr7	364150	364649	500	3
chr7	372250	372549	300	3
chr7	378950	379149	200	4
chr7	379250	379449	200	3
chr7	383850	384049	200	4
chr7	384350	384549	200	4
chr7	387250	387549	300	3
chr7	398950	399549	600	3
chr7	417850	418249	400	3
chr7	431450	431949	500	3
chr7	442650	442849	200	3
chr7	447550	448049	500	3
chr7	450450	450849	400	4
chr7	451150	451349	200	3
chr7	453250	454149	900	3
chr7	458350	458649	300	3
chr7	473850	473949	100	3
chr7	492950	493149	200	3
chr7	495650	495849	200	3
chr7	516050	516149	100	3
chr7	517250	518049	800	4
chr7	519050	519349	300	4
chr7	519450	519849	400	4
chr7	519950	520349	400	4
chr7	529250	529849	600	4
chr7	547150	547449	300	3
chr7	575950	576149	200	3
chr7	583550	583649	100	3
chr7	598050	598249	200	3
chr7	612250	612349	100	3
chr7	613150	613749	600	4
chr7	616350	616649	300	3
chr7	640850	641049	200	3
chr7	641150	641349	200	4
chr7	646450	646649	200	3
chr7	651650	651849	200	3
chr7	673250	673349	100	3
chr7	740250	740549	300	3
chr7	741050	741649	600	3
chr7	755950	756449	500	3
chr7	798850	799149	300	3
chr7	835350	835549	200	3
chr7	847550	848449	900	3
chr7	890550	890849	300	3
chr7	900950	901149	200	3
chr7	906150	906449	300	4
chr7	906750	907049	300	4
chr7	908150	908749	600	3
chr7	914250	914749	500	3
chr7	916250	916449	200	3
chr7	921450	921649	200	4
chr7	940750	941249	500	4
chr7	960350	960549	200	3
chr7	960650	960749	100	3
chr7	971050	971149	100	4
chr7	980050	980349	300	3
chr7	1004950	1005049	100	3
chr7	1009450	1009549	100	3
chr7	1009650	1009949	300	3
chr7	1048950	1049749	800	4
chr7	1051250	1051549	300	3
chr7	1058150	1058449	300	3
chr7	1064150	1064549	400	3
chr7	1068050	1068649	600	3
chr7	279950	280249	300	5
chr8	24700	25299	600	3
chr8	33700	33999	300	3
chr8	36900	37399	500	4
chr8	37600	37899	300	3
chr8	39100	39399	300	3
chr8	47800	47899	100	3
chr8	49600	49899	300	3
chr8	51400	51599	200	3
chr8	52300	52599	300	4
chr8	75700	75999	300	3
chr8	95700	95899	200	3
chr8	96100	96299	200	3
chr8	99400	99999	600	3
chr8	120400	120599	200	3
chr8	121000	121299	300	4
chr8	123200	123399	200	4
chr8	124900	125099	200	3
chr8	125200	125499	300	3
chr8	140800	141099	300	4
chr8	142500	143099	600	4
chr8	144700	145099	400	5
chr8	158900	158999	100	3
chr8	160000	160299	300	3
chr8	161800	162199	400	4
chr8	169300	169599	300	3
chr8	173700	173899	200	3
chr8	175500	175899	400	3
chr8	176100	176299	200	3
chr8	177600	177799	200	3
chr8	187200	187399	200	3
chr8	189000	189199	200	3
chr8	191000	191699	700	3
chr8	219600	219699	100	3
chr8	225900	225999	100	4
chr8	235400	235499	100	4
chr8	235800	235999	200	4
chr8	236100	236199	100	4
chr8	247200	247299	100	3
chr8	247400	247599	200	3
chr8	272900	273399	500	3
chr8	282700	282899	200	3
chr8	295000	295099	100	3
chr8	311000	311299	300	4
chr8	313100	313499	400	4
chr8	318700	319399	700	3
chr8	329500	329599	100	3
chr8	337000	337199	200	3
chr8	341100	341499	400	3
chr8	363600	363799	200	3
chr8	371000	371099	100	3
chr8	385700	385999	300	3
chr8	418000	418099	100	3
chr8	420700	420999	300	3
chr8	421700	422099	400	3
chr8	457700	457799	100	3
chr8	472400	472499	100	3
chr8	476600	476799	200	3
chr8	483500	483999	500	3
chr8	484200	484599	400	3
chr8	484800	484999	200	3
chr8	485600	485799	200	3
chr8	498200	498599	400	4
chr8	499400	499999	600	3
chr8	500300	500499	200	3
chr8	511600	511899	300	3
chr8	517800	517999	200	3
chr8	189400	189599	200	5
chr9	25800	26199	400	3
chr9	48600	48699	100	4
chr9	76700	77099	400	3
chr9	83000	83099	100	3
chr9	84100	84299	200	3
chr9	84500	84599	100	3
chr9	95100	95599	500	3
chr9	100800	100999	200	3
chr9	128800	129599	800	5
chr9	131400	131499	100	3
chr9	157900	158099	200	3
chr9	159600	159899	300	3
chr9	161400	161899	500	3
chr9	169100	169299	200	3
chr9	176900	176999	100	3
chr9	178300	178799	500	3
chr9	179100	179299	200	3
chr9	179900	180099	200	3
chr9	192700	192999	300	3
chr9	218700	218999	300	4
chr9	255300	255699	400	5
chr9	267500	267699	200	5
chr9	269500	270499	1000	4
chr9	274400	274599	200	3
chr9	275600	275899	300	3
chr9	276000	276099	100	3
chr9	286000	286099	100	3
chr9	286900	286999	100	3
chr9	292800	293099	300	3
chr9	317200	317299	100	3
chr9	365800	365899	100	3
chr9	366200	366399	200	3
chr9	371700	371999	300	3
chr9	378600	378799	200	3
chr9	378900	379099	200	3
chr9	383400	383599	200	3
chr9	383800	383899	100	4
chr9	389400	390199	800	3
chr9	390300	390899	600	3
chr9	392800	393399	600	3
chr9	398100	398299	200	3
chr9	409300	409399	100	3
chr9	413500	413699	200	3
chr9	414500	414599	100	3
chr9	421300	421599	300	4
chr9	422400	422699	300	3
chr9	392500	392799	300	5
chr9	54500	54899	400	4
chr9	23500	24099	600	4
chr9	25600	25699	100	4
chr9	128300	128399	100	4
chr9	159900	159999	100	4
