# Supplementary material for: Telomerase subunit Est2 marks internal sites that are prone to accumulate DNA damage
Source: BMC Biol. 2021 Nov 20;19:247. doi: 10.1186/s12915-021-01167-1 (PMC8605574; doi:10.1186/s12915-021-01167-1)
Supplement: Supplementary file 3 — Additional file 3: Supplementary Table S2. Table defining the NTBS overlap with gene bodies, percentage overlap of NTBS region and the gene and gene function description. [file 12915_2021_1167_MOESM3_ESM.xlsx]

## Sheet: README
Column Header	Description
gene_chromosome	Chromosome location
gene_start	Chromosome start site for the gene
gene_stop	Chromosome stop site for the gene
gene_name	Gene name
symbol	Gene symbol
name	Description of the gene
strand	location on +/- strand
N_exons	number of exons in the gene
exon_lengths	length of each exon separated by commas
bed_filename	NTBS bed file used to determine overlaps
bed_chromosome	Chromosome number for NTBS region
bed_start	Chromosome start site for NTBS region determined from ChIP-chip analysis
bed_stop	Chromosome stop site for NTBS region determined from ChIP-chip analysis
bed_overlap_length	Length of NTBS region
bed_overlap_percentage	Overlap percentage with the gene body

## Sheet: Genes overlapping with NTBS
gene_chromosome	gene_start	gene_stop	gene_name	symbol	name	strand	N_exons	exon_lengths	bed_filename	bed_chromosome	bed_start	bed_stop	bed_overlap_length	bed_overlap_percentage
chr1	31567	32941	YAL062W	GDH3	Glutamate DeHydrogenase	+	1	1374,	Est2-WMC.igv.sorted.bed	chr1	31850	32749	899	100
chr1	37464	38973	YAL058W	CNE1	CalNExin and calreticulin homolog	+	1	1509,	Est2-WMC.igv.sorted.bed	chr1	38250	38649	399	100
chr1	42880	45022	YAL054C	ACS1	Acetyl CoA Synthetase	-	1	2142,	Est2-WMC.igv.sorted.bed	chr1	44050	44249	199	100
chr1	45898	48250	YAL053W	FLC2	FLavin Carrier	+	1	2352,	Est2-WMC.igv.sorted.bed	chr1	46350	46849	499	100
chr1	58696	61054	YAL043C	PTA1	Pre-Trna Accumulation	-	1	2358,	Est2-WMC.igv.sorted.bed	chr1	59350	59649	299	100
chr1	58696	61054	YAL043C	PTA1	Pre-Trna Accumulation	-	1	2358,	Est2-WMC.igv.sorted.bed	chr1	60850	61049	199	100
chr1	61317	62565	YAL042W	ERV46	ER Vesicle	+	1	1248,	Est2-WMC.igv.sorted.bed	chr1	61450	61649	199	100
chr1	61317	62565	YAL042W	ERV46	ER Vesicle	+	1	1248,	Est2-WMC.igv.sorted.bed	chr1	62050	62549	499	100
chr1	68717	69527	YAL039C	CYC3	CYtochrome C	-	1	810,	Est2-WMC.igv.sorted.bed	chr1	68850	69049	199	100
chr1	71787	73290	YAL038W	CDC19	Cell Division Cycle	+	1	1503,	Est2-WMC.igv.sorted.bed	chr1	72850	73049	199	100
chr1	71787	73290	YAL038W	CDC19	Cell Division Cycle	+	1	1503,	Est2-WMC.igv.sorted.bed	chr1	72850	73049	199	100
chr1	75044	76154	YAL036C	RBG1	RiBosome interacting Gtpase	-	1	1110,	Est2-WMC.igv.sorted.bed	chr1	75150	75449	299	100
chr1	83336	84476	YAL032C	PRP45	Pre-mRNA Processing	-	1	1140,	Est2-WMC.igv.sorted.bed	chr1	83650	83749	99	100
chr1	83336	84476	YAL032C	PRP45	Pre-mRNA Processing	-	1	1140,	Est2-WMC.igv.sorted.bed	chr1	83950	84249	299	100
chr1	100226	101147	YAL025C	MAK16	MAintenance of Killer	-	1	921,	Est2-WMC.igv.sorted.bed	chr1	100750	100849	99	100
chr1	106273	108553	YAL023C	PMT2	Protein O-MannosylTransferase	-	1	2280,	Est2-WMC.igv.sorted.bed	chr1	106650	107349	699	100
chr1	106273	108553	YAL023C	PMT2	Protein O-MannosylTransferase	-	1	2280,	Est2-WMC.igv.sorted.bed	chr1	108050	108449	399	100
chr1	108878	110432	YAL022C	FUN26	Function Unknown Now	-	1	1554,	Est2-WMC.igv.sorted.bed	chr1	109150	109949	799	100
chr1	110847	113361	YAL021C	CCR4	Carbon Catabolite Repression	-	1	2514,	Est2-WMC.igv.sorted.bed	chr1	112050	112149	99	100
chr1	110847	113361	YAL021C	CCR4	Carbon Catabolite Repression	-	1	2514,	Est2-WMC.igv.sorted.bed	chr1	112250	112449	199	100
chr1	110847	113361	YAL021C	CCR4	Carbon Catabolite Repression	-	1	2514,	Est2-WMC.igv.sorted.bed	chr1	112550	112649	99	100
chr1	113615	114617	YAL020C	ATS1	Alpha Tubulin Suppressor	-	1	1002,	Est2-WMC.igv.sorted.bed	chr1	113750	113849	99	100
chr1	114920	118316	YAL019W	FUN30	Function Unknown Now	+	1	3396,	Est2-WMC.igv.sorted.bed	chr1	115250	115749	499	100
chr1	114920	118316	YAL019W	FUN30	Function Unknown Now	+	1	3396,	Est2-WMC.igv.sorted.bed	chr1	116350	116449	99	100
chr1	129271	130360	YAL013W	DEP1	Disability in regulation of Expression of genes involved in Phospholipid biosynthesis	+	1	1089,	Est2-WMC.igv.sorted.bed	chr1	129350	129449	99	100
chr1	129271	130360	YAL013W	DEP1	Disability in regulation of Expression of genes involved in Phospholipid biosynthesis	+	1	1089,	Est2-WMC.igv.sorted.bed	chr1	130050	130349	299	100
chr1	139504	141433	YAL005C	SSA1	Stress-Seventy subfamily A	-	1	1929,	Est2-WMC.igv.sorted.bed	chr1	139950	140449	499	100
chr1	139504	141433	YAL005C	SSA1	Stress-Seventy subfamily A	-	1	1929,	Est2-WMC.igv.sorted.bed	chr1	140950	141249	299	100
chr1	142175	143162	YAL003W	EFB1	Elongation Factor Beta	+	2	80,541,	Est2-WMC.igv.sorted.bed	chr1	142850	142949	99	100
chr1	147594	151167	YAL001C	TFC3	Transcription Factor class C	-	2	3413,70,	Est2-WMC.igv.sorted.bed	chr1	149650	149749	99	100
chr1	192612	196179	YAR042W	SWH1		+	1	3567,	Est2-WMC.igv.sorted.bed	chr1	192950	193049	99	100
chr1	192612	196179	YAR042W	SWH1		+	1	3567,	Est2-WMC.igv.sorted.bed	chr1	194150	194349	199	100
chr1	192612	196179	YAR042W	SWH1		+	1	3567,	Est2-WMC.igv.sorted.bed	chr1	195050	195349	299	100
chr2	67162	69439	YBL084C	CDC27	Cell Division Cycle	-	1	2277,	Est2-WMC.igv.sorted.bed	chr2	67600	67699	99	100
chr2	67162	69439	YBL084C	CDC27	Cell Division Cycle	-	1	2277,	Est2-WMC.igv.sorted.bed	chr2	68400	68699	299	100
chr2	69744	71121	YBL082C	ALG3	Asparagine Linked Glycosylation	-	1	1377,	Est2-WMC.igv.sorted.bed	chr2	70100	70299	199	100
chr2	71859	72966	YBL081W			+	1	1107,	Est2-WMC.igv.sorted.bed	chr2	72200	72299	99	100
chr2	81037	84256	YBL076C	ILS1	IsoLeucine-tRNA Synthetase	-	1	3219,	Est2-WMC.igv.sorted.bed	chr2	81300	81499	199	100
chr2	105276	107367	YBL061C	SKT5		-	1	2091,	Est2-WMC.igv.sorted.bed	chr2	106000	106199	199	100
chr2	122714	124721	YBL051C	PIN4	Psi+ INducibility	-	1	2007,	Est2-WMC.igv.sorted.bed	chr2	122800	123299	499	100
chr2	127856	132002	YBL047C	EDE1	EH Domains and Endocytosis	-	1	4146,	Est2-WMC.igv.sorted.bed	chr2	128400	128599	199	100
chr2	127856	132002	YBL047C	EDE1	EH Domains and Endocytosis	-	1	4146,	Est2-WMC.igv.sorted.bed	chr2	130600	130799	199	100
chr2	143950	145690	YBL039C	URA7	URAcil requiring	-	1	1740,	Est2-WMC.igv.sorted.bed	chr2	145400	145499	99	100
chr2	168384	169338	YBL027W	RPL19B	Ribosomal Protein of the Large subunit	+	2	2,568,	Est2-WMC.igv.sorted.bed	chr2	169100	169299	199	100
chr2	177835	181237	YBL022C	PIM1	Proteolysis In Mitochondria	-	1	3402,	Est2-WMC.igv.sorted.bed	chr2	178100	178399	299	100
chr2	177835	181237	YBL022C	PIM1	Proteolysis In Mitochondria	-	1	3402,	Est2-WMC.igv.sorted.bed	chr2	180300	180499	199	100
chr2	181621	182056	YBL021C	HAP3	Heme Activator Protein	-	1	435,	Est2-WMC.igv.sorted.bed	chr2	181700	181999	299	100
chr2	182362	184087	YBL020W	RFT1	Requiring Fifty-Three	+	1	1725,	Est2-WMC.igv.sorted.bed	chr2	182700	183099	399	100
chr2	202017	203199	YBL013W	FMT1	Formyl-Methionyl-tRNA Transformylase	+	1	1182,	Est2-WMC.igv.sorted.bed	chr2	202500	202799	299	100
chr2	212592	216327	YBL007C	SLA1	Synthetic Lethal with ABP1	-	1	3735,	Est2-WMC.igv.sorted.bed	chr2	215700	215799	99	100
chr2	257068	257932	YBR011C	IPP1	Inorganic PyroPhosphatase	-	1	864,	Est2-WMC.igv.sorted.bed	chr2	257800	257899	99	100
chr2	267668	269462	YBR015C	MNN2	MaNNosyltransferase	-	1	1794,	Est2-WMC.igv.sorted.bed	chr2	268300	268499	199	100
chr2	300124	301213	YBR031W	RPL4A	Ribosomal Protein of the Large subunit	+	1	1089,	Est2-WMC.igv.sorted.bed	chr2	301000	301199	199	100
chr2	309039	310272	YBR036C	CSG2	Calcium Sensitive Growth	-	1	1233,	Est2-WMC.igv.sorted.bed	chr2	309700	309899	199	100
chr2	334344	336777	YBR049C	REB1	RNA polymerase I Enhancer Binding protein	-	1	2433,	Est2-WMC.igv.sorted.bed	chr2	334800	335099	299	100
chr2	376532	378392	YBR069C	TAT1	Tyrosine and tryptophan Amino acid Transporter	-	1	1860,	Est2-WMC.igv.sorted.bed	chr2	377500	378199	699	100
chr2	380369	381005	YBR071W			+	1	636,	Est2-WMC.igv.sorted.bed	chr2	380500	380799	299	100
chr2	381988	382633	YBR072W	HSP26	Heat Shock Protein	+	1	645,	Est2-WMC.igv.sorted.bed	chr2	382500	382599	99	100
chr2	393079	394816	YBR078W	ECM33	ExtraCellular Mutant	+	2	58,1349,	Est2-WMC.igv.sorted.bed	chr2	393400	394199	799	100
chr2	395338	398233	YBR079C	RPG1		-	1	2895,	Est2-WMC.igv.sorted.bed	chr2	395500	395699	199	100
chr2	411009	413937	YBR084W	MIS1	MItochondrial C1-tetrahydrofolate Synthase	+	1	2928,	Est2-WMC.igv.sorted.bed	chr2	412500	412599	99	100
chr2	414141	415217	YBR084C-A	RPL19A	Ribosomal Protein of the Large subunit	-	2	568,2,	Est2-WMC.igv.sorted.bed	chr2	414300	414499	199	100
chr2	427653	429057	YBR092C	PHO3	PHOsphate metabolism	-	1	1404,	Est2-WMC.igv.sorted.bed	chr2	428600	428699	99	100
chr2	429503	430907	YBR093C	PHO5	PHOsphate metabolism	-	1	1404,	Est2-WMC.igv.sorted.bed	chr2	429800	430599	799	100
chr2	454777	457324	YBR108W	AIM3	Altered Inheritance rate of Mitochondria	+	1	2547,	Est2-WMC.igv.sorted.bed	chr2	455300	455499	199	100
chr2	462824	465725	YBR112C	CYC8	CYtochrome C	-	1	2901,	Est2-WMC.igv.sorted.bed	chr2	463000	463799	799	100
chr2	462824	465725	YBR112C	CYC8	CYtochrome C	-	1	2901,	Est2-WMC.igv.sorted.bed	chr2	464000	464199	199	100
chr2	462824	465725	YBR112C	CYC8	CYtochrome C	-	1	2901,	Est2-WMC.igv.sorted.bed	chr2	464000	464199	199	100
chr2	474346	476392	YBR117C	TKL2	TransKetoLase	-	1	2046,	Est2-WMC.igv.sorted.bed	chr2	475400	475499	99	100
chr2	481318	483322	YBR121C	GRS1	Glycyl-tRNA Synthase	-	1	2004,	Est2-WMC.igv.sorted.bed	chr2	482400	482599	199	100
chr2	481318	483322	YBR121C	GRS1	Glycyl-tRNA Synthase	-	1	2004,	Est2-WMC.igv.sorted.bed	chr2	482800	482999	199	100
chr2	491223	492777	YBR127C	VMA2	Vacuolar Membrane Atpase	-	1	1554,	Est2-WMC.igv.sorted.bed	chr2	492200	492599	399	100
chr2	501758	504242	YBR133C	HSL7	Histone Synthetic Lethal	-	1	2484,	Est2-WMC.igv.sorted.bed	chr2	503600	504199	599	100
chr2	563157	564525	YBR162C	TOS1	Target Of Sbf	-	1	1368,	Est2-WMC.igv.sorted.bed	chr2	563600	563799	199	100
chr2	563157	564525	YBR162C	TOS1	Target Of Sbf	-	1	1368,	Est2-WMC.igv.sorted.bed	chr2	564000	564099	99	100
chr2	576298	578041	YBR170C	NPL4	Nuclear Protein Localization	-	1	1743,	Est2-WMC.igv.sorted.bed	chr2	577700	577799	99	100
chr2	612190	613855	YBR196C	PGI1	PhosphoGlucoIsomerase	-	1	1665,	Est2-WMC.igv.sorted.bed	chr2	612500	612899	399	100
chr2	612190	613855	YBR196C	PGI1	PhosphoGlucoIsomerase	-	1	1665,	Est2-WMC.igv.sorted.bed	chr2	613500	613699	199	100
chr2	616081	618478	YBR198C	TAF5	TATA binding protein-Associated Factor	-	1	2397,	Est2-WMC.igv.sorted.bed	chr2	616400	616699	299	100
chr2	636657	642165	YBR208C	DUR1		-	1	5508,	Est2-WMC.igv.sorted.bed	chr2	639800	639899	99	100
chr2	658661	662204	YBR218C	PYC2	PYruvate Carboxylase	-	1	3543,	Est2-WMC.igv.sorted.bed	chr2	660400	660999	599	100
chr2	658661	662204	YBR218C	PYC2	PYruvate Carboxylase	-	1	3543,	Est2-WMC.igv.sorted.bed	chr2	661700	661999	299	100
chr2	698308	699898	YBR239C	ERT1	Ethanol Regulated Transcription factor	-	1	1590,	Est2-WMC.igv.sorted.bed	chr2	699200	699799	599	100
chr2	702543	704010	YBR241C			-	1	1467,	Est2-WMC.igv.sorted.bed	chr2	703200	703299	99	100
chr2	702543	704010	YBR241C			-	1	1467,	Est2-WMC.igv.sorted.bed	chr2	703600	703999	399	100
chr2	736218	737691	YBR263W	SHM1	Serine HydroxyMethyltransferase	+	1	1473,	Est2-WMC.igv.sorted.bed	chr2	736500	737099	599	100
chr2	738536	739499	YBR265W	TSC10	Temperature-sensitive Suppressors of Csg2 mutants	+	1	963,	Est2-WMC.igv.sorted.bed	chr2	739000	739299	299	100
chr2	739795	740977	YBR267W	REI1	REquired for Isotropic bud growth	+	1	1182,	Est2-WMC.igv.sorted.bed	chr2	740100	740799	699	100
chr2	774575	776267	YBR286W	APE3	AminoPEptidase	+	1	1692,	Est2-WMC.igv.sorted.bed	chr2	775800	776199	399	100
chr2	776524	777808	YBR287W			+	1	1284,	Est2-WMC.igv.sorted.bed	chr2	777300	777399	99	100
chr2	779620	782338	YBR289W	SNF5	Sucrose NonFermenting	+	1	2718,	Est2-WMC.igv.sorted.bed	chr2	780400	780599	199	100
chr2	779620	782338	YBR289W	SNF5	Sucrose NonFermenting	+	1	2718,	Est2-WMC.igv.sorted.bed	chr2	782100	782299	199	100
chr3	27928	28936	YCL055W	KAR4	KARyogamy	+	1	1008,	Est2-WMC.igv.sorted.bed	chr3	28700	28899	199	100
chr3	31448	33974	YCL054W	SPB1	Suppressor of PaB1 mutant	+	1	2526,	Est2-WMC.igv.sorted.bed	chr3	32600	32899	299	100
chr3	48652	50221	YCL043C	PDI1	Protein Disulfide Isomerase	-	1	1569,	Est2-WMC.igv.sorted.bed	chr3	49000	49999	999	100
chr3	52644	54882	YCL039W	GID7	Glucose Induced Degradation deficient	+	1	2238,	Est2-WMC.igv.sorted.bed	chr3	53900	54099	199	100
chr3	59025	60726	YCL036W	GFD2	Great for Full DEAD box protein activity	+	1	1701,	Est2-WMC.igv.sorted.bed	chr3	60400	60599	199	100
chr3	65933	68333	YCL030C	HIS4	HIStidine requiring	-	1	2400,	Est2-WMC.igv.sorted.bed	chr3	66400	66799	399	100
chr3	68598	69921	YCL029C	BIK1	BIlateral Karyogamy defect	-	1	1323,	Est2-WMC.igv.sorted.bed	chr3	69600	69799	199	100
chr3	70149	71367	YCL028W	RNQ1	Rich in asparagine (N) and glutamine (Q)	+	1	1218,	Est2-WMC.igv.sorted.bed	chr3	70800	71199	399	100
chr3	76130	77918	YCL025C	AGP1	high-Affinity Glutamine Permease	-	1	1788,	Est2-WMC.igv.sorted.bed	chr3	77400	77699	299	100
chr3	92775	94269	YCL017C	NFS1	NiFS-like	-	1	1494,	Est2-WMC.igv.sorted.bed	chr3	93100	93699	599	100
chr3	102069	103353	YCL011C	GBP2	G-strand Binding Protein	-	1	1284,	Est2-WMC.igv.sorted.bed	chr3	102100	102499	399	100
chr3	104613	105543	YCL009C	ILV6	IsoLeucine Valine	-	1	930,	Est2-WMC.igv.sorted.bed	chr3	104800	105199	399	100
chr3	105958	106849	YCL008C	STP22	STerile Pseudoreversion	-	1	891,	Est2-WMC.igv.sorted.bed	chr3	106000	106299	299	100
chr3	156100	157099	YCR021C	HSP30	Heat Shock Protein	-	1	999,	Est2-WMC.igv.sorted.bed	chr3	156200	156499	299	100
chr3	164102	166331	YCR026C	NPP1	ecto-Nucleotide Pyrophosphatase/Phosphodiesterase	-	1	2229,	Est2-WMC.igv.sorted.bed	chr3	164500	164599	99	100
chr3	208126	209602	YCR045C	RRT12	Regulator of rDNA Transcription	-	1	1476,	Est2-WMC.igv.sorted.bed	chr3	209300	209499	199	100
chr3	211920	213753	YCR048W	ARE1	Acyl-coenzyme A: cholesterol acyl transferase-Related Enzyme	+	1	1833,	Est2-WMC.igv.sorted.bed	chr3	212000	212299	299	100
chr3	211920	213753	YCR048W	ARE1	Acyl-coenzyme A: cholesterol acyl transferase-Related Enzyme	+	1	1833,	Est2-WMC.igv.sorted.bed	chr3	213100	213299	199	100
chr3	216688	218233	YCR053W	THR4	THReonine requiring	+	1	1545,	Est2-WMC.igv.sorted.bed	chr3	216800	216999	199	100
chr3	220448	223220	YCR057C	PWP2	Periodic tryptophan (W) Protein	-	1	2772,	Est2-WMC.igv.sorted.bed	chr3	222000	222599	599	100
chr3	225554	227450	YCR061W			+	1	1896,	Est2-WMC.igv.sorted.bed	chr3	226300	226399	99	100
chr3	225554	227450	YCR061W			+	1	1896,	Est2-WMC.igv.sorted.bed	chr3	226400	226599	199	100
chr3	225554	227450	YCR061W			+	1	1896,	Est2-WMC.igv.sorted.bed	chr3	226600	226899	299	100
chr3	242580	246576	YCR073C	SSK22	Suppressor of Sensor Kinase	-	1	3996,	Est2-WMC.igv.sorted.bed	chr3	242600	243499	899	100
chr3	249285	250038	YCR076C	FUB1	FUnction of Boundary	-	1	753,	Est2-WMC.igv.sorted.bed	chr3	249500	249799	299	100
chr3	250230	252621	YCR077C	PAT1	Protein Associated with Topoisomerase II	-	1	2391,	Est2-WMC.igv.sorted.bed	chr3	251500	251899	399	100
chr3	252837	254166	YCR079W	PTC6	Phosphatase Two C	+	1	1329,	Est2-WMC.igv.sorted.bed	chr3	253600	253899	299	100
chr3	265060	266839	YCR088W	ABP1	Actin Binding Protein	+	1	1779,	Est2-WMC.igv.sorted.bed	chr3	266200	266499	299	100
chr3	267426	272256	YCR089W	FIG2	Factor-Induced Gene	+	1	4830,	Est2-WMC.igv.sorted.bed	chr3	268800	269099	299	100
chr3	267426	272256	YCR089W	FIG2	Factor-Induced Gene	+	1	4830,	Est2-WMC.igv.sorted.bed	chr3	269900	269999	99	100
chr3	267426	272256	YCR089W	FIG2	Factor-Induced Gene	+	1	4830,	Est2-WMC.igv.sorted.bed	chr3	271800	271899	99	100
chr3	276756	279900	YCR092C	MSH3	MutS Homolog	-	1	3144,	Est2-WMC.igv.sorted.bed	chr3	279500	279699	199	100
chr3	280109	286436	YCR093W	CDC39	Cell Division Cycle	+	1	6327,	Est2-WMC.igv.sorted.bed	chr3	283400	283599	199	100
chr3	304353	305460	YCR102C			-	1	1107,	Est2-WMC.igv.sorted.bed	chr3	304400	304599	199	100
chr4	17576	18566	YDL243C	AAD4	Aryl-Alcohol Dehydrogenase	-	1	990,	Est2-WMC.igv.sorted.bed	chr4	18000	18199	199	100
chr4	42700	43708	YDL230W	PTP1	Protein Tyrosine Phosphatase	+	1	1008,	Est2-WMC.igv.sorted.bed	chr4	43200	43299	99	100
chr4	54397	56347	YDL224C	WHI4	WHIskey	-	1	1950,	Est2-WMC.igv.sorted.bed	chr4	54800	55199	399	100
chr4	57265	60406	YDL223C	HBT1	HuB1 Target	-	1	3141,	Est2-WMC.igv.sorted.bed	chr4	59800	60099	299	100
chr4	62244	65019	YDL220C	CDC13	Cell Division Cycle	-	1	2775,	Est2-WMC.igv.sorted.bed	chr4	62700	62999	299	100
chr4	66493	67447	YDL218W			+	1	954,	Est2-WMC.igv.sorted.bed	chr4	67000	67199	199	100
chr4	122216	123590	YDL189W	RBS1	RNA-Binding Suppressor of PAS kinase	+	1	1374,	Est2-WMC.igv.sorted.bed	chr4	122900	123199	299	100
chr4	125616	126450	YDL186W			+	1	834,	Est2-WMC.igv.sorted.bed	chr4	125900	126299	399	100
chr4	133437	134724	YDL182W	LYS20	LYSine requiring	+	1	1287,	Est2-WMC.igv.sorted.bed	chr4	133800	133999	199	100
chr4	145826	147590	YDL174C	DLD1	D-Lactate Dehydrogenase	-	1	1764,	Est2-WMC.igv.sorted.bed	chr4	145900	146199	299	100
chr4	148191	149079	YDL173W	PAR32	Phosphorylated After Rapamycin	+	1	888,	Est2-WMC.igv.sorted.bed	chr4	148400	148699	299	100
chr4	149203	155641	YDL171C	GLT1	GLuTamate synthase	-	1	6438,	Est2-WMC.igv.sorted.bed	chr4	149300	149899	599	100
chr4	149203	155641	YDL171C	GLT1	GLuTamate synthase	-	1	6438,	Est2-WMC.igv.sorted.bed	chr4	151200	151399	199	100
chr4	149203	155641	YDL171C	GLT1	GLuTamate synthase	-	1	6438,	Est2-WMC.igv.sorted.bed	chr4	151500	151599	99	100
chr4	174918	176487	YDL156W	CMR1	Changed Mutation Rate	+	1	1569,	Est2-WMC.igv.sorted.bed	chr4	176100	176199	99	100
chr4	194571	198177	YDL145C	COP1	COat Protein	-	1	3606,	Est2-WMC.igv.sorted.bed	chr4	195600	195799	199	100
chr4	194571	198177	YDL145C	COP1	COat Protein	-	1	3606,	Est2-WMC.igv.sorted.bed	chr4	197400	197599	199	100
chr4	205360	210562	YDL140C	RPO21	RNA POlymerase	-	1	5202,	Est2-WMC.igv.sorted.bed	chr4	206000	206599	599	100
chr4	231023	231899	YDL129W			+	1	876,	Est2-WMC.igv.sorted.bed	chr4	231200	231599	399	100
chr4	265256	267200	YDL109C			-	1	1944,	Est2-WMC.igv.sorted.bed	chr4	265600	265699	99	100
chr4	285389	286694	YDL097C	RPN6	Regulatory Particle Non-ATPase	-	1	1305,	Est2-WMC.igv.sorted.bed	chr4	285900	286499	599	100
chr4	287057	289511	YDL095W	PMT1	Protein O-MannosylTransferase	+	1	2454,	Est2-WMC.igv.sorted.bed	chr4	288000	288299	299	100
chr4	301411	302233	YDL086W			+	1	822,	Est2-WMC.igv.sorted.bed	chr4	301900	301999	99	100
chr4	341617	343984	YDL060W	TSR1	Twenty S rRNA accumulation	+	1	2367,	Est2-WMC.igv.sorted.bed	chr4	342900	343299	399	100
chr4	351432	352419	YDL057W			+	1	987,	Est2-WMC.igv.sorted.bed	chr4	351900	352099	199	100
chr4	384596	385583	YDL037C	BSC1	Bypass of Stop Codon	-	1	987,	Est2-WMC.igv.sorted.bed	chr4	384600	384999	399	100
chr4	389167	392053	YDL035C	GPR1	G-Protein coupled Receptor	-	1	2886,	Est2-WMC.igv.sorted.bed	chr4	390400	390499	99	100
chr4	392654	393908	YDL033C	SLM3	Synthetic Lethal with Mss4	-	1	1254,	Est2-WMC.igv.sorted.bed	chr4	393300	393499	199	100
chr4	484157	485360	YDR019C	GCV1	GlyCine cleaVage	-	1	1203,	Est2-WMC.igv.sorted.bed	chr4	484500	484799	299	100
chr4	525433	527209	YDR037W	KRS1	Lysyl (K) tRNA Synthetase	+	1	1776,	Est2-WMC.igv.sorted.bed	chr4	526100	526299	199	100
chr4	546636	547623	YDR044W	HEM13	HEMe biosynthesis	+	1	987,	Est2-WMC.igv.sorted.bed	chr4	546900	547099	199	100
chr4	548756	550571	YDR046C	BAP3	Branched-chain Amino acid Permease	-	1	1815,	Est2-WMC.igv.sorted.bed	chr4	550000	550199	199	100
chr4	563521	564856	YDR055W	PST1	Protoplasts-SecreTed	+	1	1335,	Est2-WMC.igv.sorted.bed	chr4	564100	564499	399	100
chr4	600786	601803	YDR077W	SED1	Suppression of Exponential Defect	+	1	1017,	Est2-WMC.igv.sorted.bed	chr4	601700	601799	99	100
chr4	631274	636113	YDR093W	DNF2	Drs2 Neo1 Family	+	1	4839,	Est2-WMC.igv.sorted.bed	chr4	633600	634199	599	100
chr4	691541	693254	YDR120C	TRM1	tRNA Methyltransferase	-	1	1713,	Est2-WMC.igv.sorted.bed	chr4	692500	692699	199	100
chr4	694692	697887	YDR122W	KIN1	KINase	+	1	3195,	Est2-WMC.igv.sorted.bed	chr4	695000	695299	299	100
chr4	704476	709243	YDR127W	ARO1	AROmatic amino acid requiring	+	1	4767,	Est2-WMC.igv.sorted.bed	chr4	709000	709099	99	100
chr4	722996	727544	YDR135C	YCF1	Yeast Cadmium Factor	-	1	4548,	Est2-WMC.igv.sorted.bed	chr4	724600	724699	99	100
chr4	742034	743867	YDR143C	SAN1	Sir Antagonist	-	1	1833,	Est2-WMC.igv.sorted.bed	chr4	742300	742599	299	100
chr4	742034	743867	YDR143C	SAN1	Sir Antagonist	-	1	1833,	Est2-WMC.igv.sorted.bed	chr4	743100	743199	99	100
chr4	755620	763867	YDR150W	NUM1	NUclear Migration	+	1	8247,	Est2-WMC.igv.sorted.bed	chr4	759500	759699	199	100
chr4	808316	810374	YDR172W	SUP35	SUPpressor	+	1	2058,	Est2-WMC.igv.sorted.bed	chr4	808600	808799	199	100
chr4	808316	810374	YDR172W	SUP35	SUPpressor	+	1	2058,	Est2-WMC.igv.sorted.bed	chr4	809600	809899	299	100
chr4	832850	835484	YDR186C	SND1	Srp-iNDependent targeting	-	1	2634,	Est2-WMC.igv.sorted.bed	chr4	834200	834399	199	100
chr4	836412	838053	YDR188W	CCT6	Chaperonin Containing TCP-1	+	1	1641,	Est2-WMC.igv.sorted.bed	chr4	836900	837799	899	100
chr4	842328	843441	YDR191W	HST4	Homolog of SIR Two (SIR2)	+	1	1113,	Est2-WMC.igv.sorted.bed	chr4	842800	842899	99	100
chr4	862045	864700	YDR206W	EBS1	Est1-like Bcy1 Suppressor	+	1	2655,	Est2-WMC.igv.sorted.bed	chr4	864500	864699	199	100
chr4	868215	870555	YDR208W	MSS4	Multicopy Suppressor of Stt4 mutation	+	1	2340,	Est2-WMC.igv.sorted.bed	chr4	868500	868699	199	100
chr4	927442	929089	YDR232W	HEM1	HEMe biosynthesis	+	1	1647,	Est2-WMC.igv.sorted.bed	chr4	927900	928099	199	100
chr4	927442	929089	YDR232W	HEM1	HEMe biosynthesis	+	1	1647,	Est2-WMC.igv.sorted.bed	chr4	928700	928899	199	100
chr4	931119	933201	YDR234W	LYS4	LYSine requiring	+	1	2082,	Est2-WMC.igv.sorted.bed	chr4	931500	932099	599	100
chr4	931119	933201	YDR234W	LYS4	LYSine requiring	+	1	2082,	Est2-WMC.igv.sorted.bed	chr4	932200	932699	499	100
chr4	937885	940807	YDR238C	SEC26	SECretory	-	1	2922,	Est2-WMC.igv.sorted.bed	chr4	939300	939399	99	100
chr4	968123	969671	YDR256C	CTA1	CaTalase A	-	1	1548,	Est2-WMC.igv.sorted.bed	chr4	968500	968699	199	100
chr4	1002500	1003493	YDR267C	CIA1	Cytosolic Iron-sulfur protein Assembly	-	1	993,	Est2-WMC.igv.sorted.bed	chr4	1002800	1003199	399	100
chr4	1023501	1024746	YDR282C	MRX10	Mitochondrial oRganization of gene eXpression (MIOREX)	-	1	1245,	Est2-WMC.igv.sorted.bed	chr4	1024200	1024399	199	100
chr4	1089210	1090071	YDR313C	PIB1	PhosphatidylInositol(3)-phosphate Binding	-	1	861,	Est2-WMC.igv.sorted.bed	chr4	1089300	1089699	399	100
chr4	1183286	1184246	YDR353W	TRR1	ThioRedoxin Reductase	+	1	960,	Est2-WMC.igv.sorted.bed	chr4	1183600	1183799	199	100
chr4	1252524	1254489	YDR389W	SAC7	Suppressor of ACtin	+	1	1965,	Est2-WMC.igv.sorted.bed	chr4	1253400	1253799	399	100
chr4	1279197	1283787	YDR406W	PDR15	Pleiotropic Drug Resistance	+	1	4590,	Est2-WMC.igv.sorted.bed	chr4	1280400	1280499	99	100
chr4	1289393	1292108	YDR409W	SIZ1	SAP and mIZ-finger domain	+	1	2715,	Est2-WMC.igv.sorted.bed	chr4	1291600	1291699	99	100
chr4	1306254	1311663	YDR420W	HKR1	Hansenula mrakii Killer toxin Resistant	+	1	5409,	Est2-WMC.igv.sorted.bed	chr4	1307200	1307299	99	100
chr4	1306254	1311663	YDR420W	HKR1	Hansenula mrakii Killer toxin Resistant	+	1	5409,	Est2-WMC.igv.sorted.bed	chr4	1307700	1307999	299	100
chr4	1306254	1311663	YDR420W	HKR1	Hansenula mrakii Killer toxin Resistant	+	1	5409,	Est2-WMC.igv.sorted.bed	chr4	1307700	1307999	299	100
chr4	1306254	1311663	YDR420W	HKR1	Hansenula mrakii Killer toxin Resistant	+	1	5409,	Est2-WMC.igv.sorted.bed	chr4	1308400	1308599	199	100
chr4	1306254	1311663	YDR420W	HKR1	Hansenula mrakii Killer toxin Resistant	+	1	5409,	Est2-WMC.igv.sorted.bed	chr4	1308400	1308599	199	100
chr4	1334808	1336941	YDR436W	PPZ2	Protein Phosphatase Z	+	1	2133,	Est2-WMC.igv.sorted.bed	chr4	1335600	1335799	199	100
chr4	1345663	1349926	YDR443C	SSN2	Suppressor of SNf1	-	1	4263,	Est2-WMC.igv.sorted.bed	chr4	1345900	1346099	199	100
chr4	1388859	1393167	YDR464W	SPP41	Suppressor of PrP4	+	1	4308,	Est2-WMC.igv.sorted.bed	chr4	1389400	1389499	99	100
chr4	1412360	1414262	YDR477W	SNF1	Sucrose NonFermenting	+	1	1902,	Est2-WMC.igv.sorted.bed	chr4	1413000	1413099	99	100
chr4	1418537	1420238	YDR481C	PHO8	PHOsphate metabolism	-	1	1701,	Est2-WMC.igv.sorted.bed	chr4	1419600	1419899	299	100
chr4	1429175	1430777	YDR488C	PAC11	Perish in the Absence of CIN8	-	1	1602,	Est2-WMC.igv.sorted.bed	chr4	1429500	1430199	699	100
chr4	1441420	1443391	YDR496C	PUF6	PUmilio-homology domain Family	-	1	1971,	Est2-WMC.igv.sorted.bed	chr4	1442800	1442999	199	100
chr4	1443700	1445455	YDR497C	ITR1	myo-Inositol TRansporter	-	1	1755,	Est2-WMC.igv.sorted.bed	chr4	1444800	1445299	499	100
chr4	1459715	1461542	YDR506C	GMC1	Grand Meiotic recombination Cluster	-	1	1827,	Est2-WMC.igv.sorted.bed	chr4	1460100	1460299	199	100
chr4	1466440	1468432	YDR508C	GNP1	GlutamiNe Permease	-	1	1992,	Est2-WMC.igv.sorted.bed	chr4	1467300	1467599	299	100
chr4	1466440	1468432	YDR508C	GNP1	GlutamiNe Permease	-	1	1992,	Est2-WMC.igv.sorted.bed	chr4	1467800	1467899	99	100
chr4	1474961	1476464	YDR516C	EMI2	Early Meiotic Induction	-	1	1503,	Est2-WMC.igv.sorted.bed	chr4	1475300	1475399	99	100
chr4	1477226	1478345	YDR517W	GRH1	GRasp65 (Golgi reassembly stacking protein of 65kD) Homolog	+	1	1119,	Est2-WMC.igv.sorted.bed	chr4	1478100	1478299	199	100
chr5	43251	44925	YEL058W	PCM1	PhosphoaCetylglucosamine Mutase	+	1	1674,	Est2-WMC.igv.sorted.bed	chr5	43500	43699	199	100
chr5	43251	44925	YEL058W	PCM1	PhosphoaCetylglucosamine Mutase	+	1	1674,	Est2-WMC.igv.sorted.bed	chr5	44000	44199	199	100
chr5	48470	51539	YEL055C	POL5	POLymerase	-	1	3069,	Est2-WMC.igv.sorted.bed	chr5	49300	49399	99	100
chr5	52720	53218	YEL054C	RPL12A	Ribosomal Protein of the Large subunit	-	1	498,	Est2-WMC.igv.sorted.bed	chr5	52800	53099	299	100
chr5	70477	73348	YEL043W			+	1	2871,	Est2-WMC.igv.sorted.bed	chr5	72900	73099	199	100
chr5	81406	82603	YEL037C	RAD23	RADiation sensitive	-	1	1197,	Est2-WMC.igv.sorted.bed	chr5	81500	82299	799	100
chr5	118616	120299	YEL020C	PXP1	PeroXisomal Protein	-	1	1683,	Est2-WMC.igv.sorted.bed	chr5	119000	119199	199	100
chr5	159578	160274	YER004W	FMP52	Found in Mitochondrial Proteome	+	1	696,	Est2-WMC.igv.sorted.bed	chr5	159900	160099	199	100
chr5	189501	191787	YER017C	AFG3	ATPase Family Gene	-	1	2286,	Est2-WMC.igv.sorted.bed	chr5	190100	190199	99	100
chr5	235768	237118	YER043C	SAH1	S-Adenosyl-l-Homocysteine hydrolase	-	1	1350,	Est2-WMC.igv.sorted.bed	chr5	236000	236299	299	100
chr5	235768	237118	YER043C	SAH1	S-Adenosyl-l-Homocysteine hydrolase	-	1	1350,	Est2-WMC.igv.sorted.bed	chr5	236800	236999	199	100
chr5	256373	257957	YER052C	HOM3	HOMoserine requiring	-	1	1584,	Est2-WMC.igv.sorted.bed	chr5	257400	257499	99	100
chr5	264890	265784	YER055C	HIS1	HIStidine	-	1	894,	Est2-WMC.igv.sorted.bed	chr5	265300	265399	99	100
chr5	279927	280680	YER062C	GPP2	Glycerol-3-Phosphate Phosphatase	-	1	753,	Est2-WMC.igv.sorted.bed	chr5	280500	280599	99	100
chr5	285238	286912	YER065C	ICL1	IsoCitrate Lyase	-	1	1674,	Est2-WMC.igv.sorted.bed	chr5	285600	286199	599	100
chr5	322681	324091	YER081W	SER3	SERine requiring	+	1	1410,	Est2-WMC.igv.sorted.bed	chr5	323500	323699	199	100
chr5	333171	335184	YER088C	DOT6	Disruptor Of Telomeric silencing	-	1	2013,	Est2-WMC.igv.sorted.bed	chr5	333600	333699	99	100
chr5	333171	335184	YER088C	DOT6	Disruptor Of Telomeric silencing	-	1	2013,	Est2-WMC.igv.sorted.bed	chr5	333800	334199	399	100
chr5	339859	342163	YER091C	MET6	METhionine requiring	-	1	2304,	Est2-WMC.igv.sorted.bed	chr5	340200	340699	499	100
chr5	339859	342163	YER091C	MET6	METhionine requiring	-	1	2304,	Est2-WMC.igv.sorted.bed	chr5	341400	341599	199	100
chr5	349975	351178	YER095W	RAD51	RADiation sensitive	+	1	1203,	Est2-WMC.igv.sorted.bed	chr5	350800	351099	299	100
chr5	378757	382099	YER110C	KAP123	KAryoPherin	-	1	3342,	Est2-WMC.igv.sorted.bed	chr5	379600	379899	299	100
chr5	378757	382099	YER110C	KAP123	KAryoPherin	-	1	3342,	Est2-WMC.igv.sorted.bed	chr5	381600	381899	299	100
chr5	413389	414175	YER126C	NSA2	Nop Seven Associated	-	1	786,	Est2-WMC.igv.sorted.bed	chr5	413800	413899	99	100
chr5	425183	430445	YER132C	PMD1	Paralog of MDS3	-	1	5262,	Est2-WMC.igv.sorted.bed	chr5	427800	428099	299	100
chr5	460520	461735	YER145C	FTR1	Fe TRansporter	-	1	1215,	Est2-WMC.igv.sorted.bed	chr5	460900	461199	299	100
chr5	462962	464837	YER147C	SCC4	Sister Chromatid Cohesion	-	1	1875,	Est2-WMC.igv.sorted.bed	chr5	464000	464399	399	100
chr5	468364	468811	YER150W	SPI1	Stationary Phase Induced	+	1	447,	Est2-WMC.igv.sorted.bed	chr5	468700	468799	99	100
chr5	475014	476223	YER154W	OXA1	cytochrome OXidase Activity	+	1	1209,	Est2-WMC.igv.sorted.bed	chr5	475200	475499	299	100
chr5	475014	476223	YER154W	OXA1	cytochrome OXidase Activity	+	1	1209,	Est2-WMC.igv.sorted.bed	chr5	475600	475799	199	100
chr5	510367	512101	YER165W	PAB1	Poly(A) Binding protein	+	1	1734,	Est2-WMC.igv.sorted.bed	chr5	511500	511899	399	100
chr5	541684	545050	YER176W	ECM32	ExtraCellular Mutant	+	1	3366,	Est2-WMC.igv.sorted.bed	chr5	544900	544999	99	100
chr5	545605	546409	YER177W	BMH1	Brain Modulosignalin Homolog	+	1	804,	Est2-WMC.igv.sorted.bed	chr5	546100	546199	99	100
chr6	33271	35848	YFL050C	ALR2	ALuminum Resistance	-	1	2577,	Est2-WMC.igv.sorted.bed	chr6	34800	34999	199	100
chr6	33271	35848	YFL050C	ALR2	ALuminum Resistance	-	1	2577,	Est2-WMC.igv.sorted.bed	chr6	35200	35599	399	100
chr6	44654	45560	YFL044C	OTU1	Ovarian TUmor	-	1	906,	Est2-WMC.igv.sorted.bed	chr6	44900	45399	499	100
chr6	51349	52972	YFL040W			+	1	1623,	Est2-WMC.igv.sorted.bed	chr6	52600	52899	299	100
chr6	56334	57708	YFL037W	TUB2	TUBulin	+	1	1374,	Est2-WMC.igv.sorted.bed	chr6	56400	57199	799	100
chr6	69112	74425	YFL033C	RIM15	Regulator of IME2	-	1	5313,	Est2-WMC.igv.sorted.bed	chr6	72300	72799	499	100
chr6	75176	76145	YFL031W	HAC1	Homologous to Atf/Creb1	+	2	661,56,	Est2-WMC.igv.sorted.bed	chr6	75300	75799	499	100
chr6	90983	93374	YFL023W	BUD27	BUD site selection	+	1	2391,	Est2-WMC.igv.sorted.bed	chr6	91400	91799	399	100
chr6	93496	95008	YFL022C	FRS2	phenylalanyl (F)-tRNA Synthetase	-	1	1512,	Est2-WMC.igv.sorted.bed	chr6	93800	94399	599	100
chr6	104694	106230	YFL016C	MDJ1	Mitochondrial DnaJ	-	1	1536,	Est2-WMC.igv.sorted.bed	chr6	105300	105499	199	100
chr6	112338	113979	YFL011W	HXT10	HeXose Transporter	+	1	1641,	Est2-WMC.igv.sorted.bed	chr6	112500	112699	199	100
chr6	115101	115737	YFL010C	WWM1	WW domain containing protein interacting with Metacaspase	-	1	636,	Est2-WMC.igv.sorted.bed	chr6	115400	115499	99	100
chr6	162481	164740	YFR009W	GCN20	General Control Nonderepressible	+	1	2259,	Est2-WMC.igv.sorted.bed	chr6	163600	163799	199	100
chr6	184489	191326	YFR019W	FAB1	Forms Aploid and Binucleate cells	+	1	6837,	Est2-WMC.igv.sorted.bed	chr6	189200	189399	199	100
chr6	194799	196302	YFR021W	ATG18	AuTophaGy related	+	1	1503,	Est2-WMC.igv.sorted.bed	chr6	195700	195899	199	100
chr6	208400	210056	YFR028C	CDC14	Cell Division Cycle	-	1	1656,	Est2-WMC.igv.sorted.bed	chr6	208500	208799	299	100
chr6	210924	212961	YFR029W	PTR3	Peptide TRansport	+	1	2037,	Est2-WMC.igv.sorted.bed	chr6	211500	211699	199	100
chr6	227499	229173	YFR037C	RSC8	Remodel the Structure of Chromatin	-	1	1674,	Est2-WMC.igv.sorted.bed	chr6	227700	228199	499	100
chr6	227499	229173	YFR037C	RSC8	Remodel the Structure of Chromatin	-	1	1674,	Est2-WMC.igv.sorted.bed	chr6	228600	228799	199	100
chr6	239979	241425	YFR044C	DUG1	Deficient in Utilization of Glutathione	-	1	1446,	Est2-WMC.igv.sorted.bed	chr6	240600	240899	299	100
chr6	250149	251790	YFR051C	RET2	RETrieval from ER	-	1	1641,	Est2-WMC.igv.sorted.bed	chr6	250200	250499	299	100
chr7	22303	23203	YGL254W	FZF1	Five Zinc Fingers	+	1	900,	Est2-WMC.igv.sorted.bed	chr7	22950	23149	199	100
chr7	23934	25395	YGL253W	HXK2	HeXoKinase	+	1	1461,	Est2-WMC.igv.sorted.bed	chr7	24150	24849	699	100
chr7	39022	41149	YGL245W	GUS1	GlUtamyl-tRNA Synthetase	+	1	2127,	Est2-WMC.igv.sorted.bed	chr7	40250	40649	399	100
chr7	41497	43174	YGL244W	RTF1	Restores TBP Function	+	1	1677,	Est2-WMC.igv.sorted.bed	chr7	41950	42349	399	100
chr7	53755	55795	YGL236C	MTO1	Mitochondrial Translation Optimization	-	1	2040,	Est2-WMC.igv.sorted.bed	chr7	54950	55149	199	100
chr7	53755	55795	YGL236C	MTO1	Mitochondrial Translation Optimization	-	1	2040,	Est2-WMC.igv.sorted.bed	chr7	55550	55649	99	100
chr7	56480	58889	YGL234W	ADE5		+	1	2409,	Est2-WMC.igv.sorted.bed	chr7	57250	57349	99	100
chr7	56480	58889	YGL234W	ADE5		+	1	2409,	Est2-WMC.igv.sorted.bed	chr7	57950	58149	199	100
chr7	82875	84255	YGL219C	MDM34	Mitochondrial Distribution and Morphology	-	1	1380,	Est2-WMC.igv.sorted.bed	chr7	83450	83749	299	100
chr7	84882	87300	YGL216W	KIP3	KInesin related Protein	+	1	2418,	Est2-WMC.igv.sorted.bed	chr7	85550	85849	299	100
chr7	91434	92385	YGL212W	VAM7	VAcuolar Morphogenesis	+	1	951,	Est2-WMC.igv.sorted.bed	chr7	92050	92149	99	100
chr7	108159	110406	YGL205W	POX1		+	1	2247,	Est2-WMC.igv.sorted.bed	chr7	108750	109049	299	100
chr7	142249	144052	YGL192W	IME4	Inducer of MEiosis	+	1	1803,	Est2-WMC.igv.sorted.bed	chr7	143650	143749	99	100
chr7	187619	190472	YGL167C	PMR1	Plasma Membrane ATPase Related	-	1	2853,	Est2-WMC.igv.sorted.bed	chr7	189450	189549	99	100
chr7	191132	191810	YGL166W	CUP2		+	1	678,	Est2-WMC.igv.sorted.bed	chr7	191550	191749	199	100
chr7	198141	199041	YGL162W	SUT1	Sterol UpTake	+	1	900,	Est2-WMC.igv.sorted.bed	chr7	198450	198749	299	100
chr7	221106	225576	YGL150C	INO80	INOsitol requiring	-	1	4470,	Est2-WMC.igv.sorted.bed	chr7	225050	225249	199	100
chr7	226401	227532	YGL148W	ARO2	AROmatic amino acid requiring	+	1	1131,	Est2-WMC.igv.sorted.bed	chr7	227150	227349	199	100
chr7	270395	270779	YGL127C	SOH1	Suppressor Of Hpr1	-	1	384,	Est2-WMC.igv.sorted.bed	chr7	270450	270649	199	100
chr7	271000	272143	YGL126W	SCS3	Suppressor of Choline Sensitivity	+	1	1143,	Est2-WMC.igv.sorted.bed	chr7	271150	271849	699	100
chr7	272523	274326	YGL125W	MET13	METhionine requiring	+	1	1803,	Est2-WMC.igv.sorted.bed	chr7	272850	273249	399	100
chr7	272523	274326	YGL125W	MET13	METhionine requiring	+	1	1803,	Est2-WMC.igv.sorted.bed	chr7	273950	274049	99	100
chr7	278949	280527	YGL122C	NAB2	Nuclear polyAdenylated RNA-Binding	-	1	1578,	Est2-WMC.igv.sorted.bed	chr7	279550	279749	199	100
chr7	278949	280527	YGL122C	NAB2	Nuclear polyAdenylated RNA-Binding	-	1	1578,	Est2-WMC.igv.sorted.bed	chr7	279950	280249	299	100
chr7	278949	280527	YGL122C	NAB2	Nuclear polyAdenylated RNA-Binding	-	1	1578,	Est2-WMC.igv.sorted.bed	chr7	279950	280249	299	100
chr7	347119	349369	YGL086W	MAD1	Mitotic Arrest-Deficient	+	1	2250,	Est2-WMC.igv.sorted.bed	chr7	348750	349049	299	100
chr7	372012	374085	YGL071W	AFT1	Activator of Ferrous Transport	+	1	2073,	Est2-WMC.igv.sorted.bed	chr7	372250	372549	299	100
chr7	377609	379583	YGL066W	SGF73	SaGa associated Factor	+	1	1974,	Est2-WMC.igv.sorted.bed	chr7	378950	379149	199	100
chr7	377609	379583	YGL066W	SGF73	SaGa associated Factor	+	1	1974,	Est2-WMC.igv.sorted.bed	chr7	379250	379449	199	100
chr7	383654	384767	YGL063W	PUS2	PseudoUridine Synthase	+	1	1113,	Est2-WMC.igv.sorted.bed	chr7	383850	384049	199	100
chr7	383654	384767	YGL063W	PUS2	PseudoUridine Synthase	+	1	1113,	Est2-WMC.igv.sorted.bed	chr7	384350	384549	199	100
chr7	385196	388733	YGL062W	PYC1	PYruvate Carboxylase	+	1	3537,	Est2-WMC.igv.sorted.bed	chr7	387250	387549	299	100
chr7	398628	400161	YGL055W	OLE1	OLEic acid requiring	+	1	1533,	Est2-WMC.igv.sorted.bed	chr7	398950	399549	599	100
chr7	417484	418414	YGL043W	DST1	DNA Strand Transfer	+	1	930,	Est2-WMC.igv.sorted.bed	chr7	417850	418249	399	100
chr7	441283	442912	YGL028C	SCW11	Soluble Cell Wall protein	-	1	1629,	Est2-WMC.igv.sorted.bed	chr7	442650	442849	199	100
chr7	446414	448538	YGL026C	TRP5	TRyPtophan	-	1	2124,	Est2-WMC.igv.sorted.bed	chr7	447550	448049	499	100
chr7	450199	452107	YGL023C	PIB2	PhosphatidylInositol(3)-phosphate Binding	-	1	1908,	Est2-WMC.igv.sorted.bed	chr7	450450	450849	399	100
chr7	450199	452107	YGL023C	PIB2	PhosphatidylInositol(3)-phosphate Binding	-	1	1908,	Est2-WMC.igv.sorted.bed	chr7	451150	451349	199	100
chr7	452406	454563	YGL022W	STT3	STaurosporine and Temperature sensitive	+	1	2157,	Est2-WMC.igv.sorted.bed	chr7	453250	454149	899	100
chr7	458158	458995	YGL019W	CKB1	Casein Kinase Beta subunit	+	1	837,	Est2-WMC.igv.sorted.bed	chr7	458350	458649	299	100
chr7	472857	474279	YGL012W	ERG4	ERGosterol biosynthesis	+	1	1422,	Est2-WMC.igv.sorted.bed	chr7	473850	473949	99	100
chr7	492475	494176	YGL003C	CDH1	CDC20 Homolog	-	1	1701,	Est2-WMC.igv.sorted.bed	chr7	492950	493149	199	100
chr7	495454	496504	YGL001C	ERG26	ERGosterol biosynthesis	-	1	1050,	Est2-WMC.igv.sorted.bed	chr7	495650	495849	199	100
chr7	514554	516417	YGR013W	SNU71	Small NUclear ribonucleoprotein associated	+	1	1863,	Est2-WMC.igv.sorted.bed	chr7	516050	516149	99	100
chr7	516943	520864	YGR014W	MSB2	Multicopy Suppression of a Budding defect	+	1	3921,	Est2-WMC.igv.sorted.bed	chr7	517250	518049	799	100
chr7	516943	520864	YGR014W	MSB2	Multicopy Suppression of a Budding defect	+	1	3921,	Est2-WMC.igv.sorted.bed	chr7	519050	519349	299	100
chr7	516943	520864	YGR014W	MSB2	Multicopy Suppression of a Budding defect	+	1	3921,	Est2-WMC.igv.sorted.bed	chr7	519450	519849	399	100
chr7	516943	520864	YGR014W	MSB2	Multicopy Suppression of a Budding defect	+	1	3921,	Est2-WMC.igv.sorted.bed	chr7	519950	520349	399	100
chr7	546441	547470	YGR031W	IMO32	Intermediate cleaved by Mitochondrial Octapeptidyl aminopeptidase	+	1	1029,	Est2-WMC.igv.sorted.bed	chr7	547150	547449	299	100
chr7	575398	576505	YGR040W	KSS1	Kinase Suppressor of Sst2 mutations	+	1	1107,	Est2-WMC.igv.sorted.bed	chr7	575950	576149	199	100
chr7	582990	583893	YGR044C	RME1	Regulator of MEiosis	-	1	903,	Est2-WMC.igv.sorted.bed	chr7	583550	583649	99	100
chr7	596693	598622	YGR054W			+	1	1929,	Est2-WMC.igv.sorted.bed	chr7	598050	598249	199	100
chr7	611889	615966	YGR061C	ADE6	ADEnine requiring	-	1	4077,	Est2-WMC.igv.sorted.bed	chr7	612250	612349	99	100
chr7	611889	615966	YGR061C	ADE6	ADEnine requiring	-	1	4077,	Est2-WMC.igv.sorted.bed	chr7	613150	613749	599	100
chr7	616328	617279	YGR062C	COX18	Cytochrome c OXidase	-	1	951,	Est2-WMC.igv.sorted.bed	chr7	616350	616649	299	100
chr7	640720	641833	YGR079W			+	1	1113,	Est2-WMC.igv.sorted.bed	chr7	640850	641049	199	100
chr7	640720	641833	YGR079W			+	1	1113,	Est2-WMC.igv.sorted.bed	chr7	641150	641349	199	100
chr7	644860	646816	YGR083C	GCD2	General Control Derepressed	-	1	1956,	Est2-WMC.igv.sorted.bed	chr7	646450	646649	199	100
chr7	651290	652982	YGR087C	PDC6	Pyruvate DeCarboxylase	-	1	1692,	Est2-WMC.igv.sorted.bed	chr7	651650	651849	199	100
chr7	672186	675501	YGR094W	VAS1	VAlyl-tRNA Synthetase	+	1	3315,	Est2-WMC.igv.sorted.bed	chr7	673250	673349	99	100
chr7	739945	741664	YGR124W	ASN2	ASparagiNe requiring	+	1	1719,	Est2-WMC.igv.sorted.bed	chr7	740250	740549	299	100
chr7	739945	741664	YGR124W	ASN2	ASparagiNe requiring	+	1	1719,	Est2-WMC.igv.sorted.bed	chr7	741050	741649	599	100
chr7	755590	756454	YGR132C	PHB1	ProHiBitin	-	1	864,	Est2-WMC.igv.sorted.bed	chr7	755950	756449	499	100
chr7	798544	800068	YGR155W	CYS4	CYStathionine beta-synthase	+	1	1524,	Est2-WMC.igv.sorted.bed	chr7	798850	799149	299	100
chr7	834690	835905	YGR169C	PUS6	PseudoUridine Synthase	-	1	1215,	Est2-WMC.igv.sorted.bed	chr7	835350	835549	199	100
chr7	889734	892188	YGR196C	FYV8	Function required for Yeast Viability	-	1	2454,	Est2-WMC.igv.sorted.bed	chr7	890550	890849	299	100
chr7	899905	902272	YGR200C	ELP2	ELongator Protein	-	1	2367,	Est2-WMC.igv.sorted.bed	chr7	900950	901149	199	100
chr7	905935	908776	YGR204W	ADE3	ADEnine requiring	+	1	2841,	Est2-WMC.igv.sorted.bed	chr7	906150	906449	299	100
chr7	905935	908776	YGR204W	ADE3	ADEnine requiring	+	1	2841,	Est2-WMC.igv.sorted.bed	chr7	906750	907049	299	100
chr7	905935	908776	YGR204W	ADE3	ADEnine requiring	+	1	2841,	Est2-WMC.igv.sorted.bed	chr7	908150	908749	599	100
chr7	915242	916703	YGR211W	ZPR1	Zinc finger PRotein	+	1	1461,	Est2-WMC.igv.sorted.bed	chr7	916250	916449	199	100
chr7	920576	921790	YGR214W	RPS0A	Ribosomal Protein of the Small subunit	+	2	90,669,	Est2-WMC.igv.sorted.bed	chr7	921450	921649	199	100
chr7	959904	961104	YGR234W	YHB1	Yeast flavoHemogloBin	+	1	1200,	Est2-WMC.igv.sorted.bed	chr7	960350	960549	199	100
chr7	959904	961104	YGR234W	YHB1	Yeast flavoHemogloBin	+	1	1200,	Est2-WMC.igv.sorted.bed	chr7	960650	960749	99	100
chr7	970773	973737	YGR240C	PFK1	PhosphoFructoKinase	-	1	2964,	Est2-WMC.igv.sorted.bed	chr7	971050	971149	99	100
chr7	979767	982071	YGR245C	SDA1	Severe Depolymerization of Actin	-	1	2304,	Est2-WMC.igv.sorted.bed	chr7	980050	980349	299	100
chr7	1004627	1006106	YGR256W	GND2	6-phosphoGlucoNateDehydrogenase	+	1	1479,	Est2-WMC.igv.sorted.bed	chr7	1004950	1005049	99	100
chr7	1007674	1010770	YGR258C	RAD2	RADiation sensitivity	-	1	3096,	Est2-WMC.igv.sorted.bed	chr7	1009450	1009549	99	100
chr7	1007674	1010770	YGR258C	RAD2	RADiation sensitivity	-	1	3096,	Est2-WMC.igv.sorted.bed	chr7	1009650	1009949	299	100
chr7	1048801	1049962	YGR279C	SCW4	Soluble Cell Wall protein	-	1	1161,	Est2-WMC.igv.sorted.bed	chr7	1048950	1049749	799	100
chr7	1050913	1051729	YGR280C	PXR1	PinX1-Related gene	-	1	816,	Est2-WMC.igv.sorted.bed	chr7	1051250	1051549	299	100
chr7	1057786	1058728	YGR282C	BGL2	Beta-GLucanase	-	1	942,	Est2-WMC.igv.sorted.bed	chr7	1058150	1058449	299	100
chr7	1063816	1064944	YGR286C	BIO2	BIOtin	-	1	1128,	Est2-WMC.igv.sorted.bed	chr7	1064150	1064549	399	100
chr7	1067225	1068995	YGR287C	IMA1	IsoMAltase	-	1	1770,	Est2-WMC.igv.sorted.bed	chr7	1068050	1068649	599	100
chr8	23613	25506	YHL038C	CBP2	Cytochrome B mRNA Processing	-	1	1893,	Est2-WMC.igv.sorted.bed	chr8	24700	25299	599	100
chr8	33190	34075	YHL034C	SBP1		-	1	885,	Est2-WMC.igv.sorted.bed	chr8	33700	33999	299	100
chr8	36376	38506	YHL032C	GUT1	Glycerol UTilization	-	1	2130,	Est2-WMC.igv.sorted.bed	chr8	36900	37399	499	100
chr8	36376	38506	YHL032C	GUT1	Glycerol UTilization	-	1	2130,	Est2-WMC.igv.sorted.bed	chr8	37600	37899	299	100
chr8	38812	39484	YHL031C	GOS1	GOlgi Snare	-	1	672,	Est2-WMC.igv.sorted.bed	chr8	39100	39399	299	100
chr8	45926	47966	YHL029C	OCA5	Oxidant-induced Cell-cycle Arrest	-	1	2040,	Est2-WMC.igv.sorted.bed	chr8	47800	47899	99	100
chr8	48760	50578	YHL028W	WSC4	cell Wall integrity and Stress response Component	+	1	1818,	Est2-WMC.igv.sorted.bed	chr8	49600	49899	299	100
chr8	51108	52986	YHL027W	RIM101	Regulator of IME2	+	1	1878,	Est2-WMC.igv.sorted.bed	chr8	51400	51599	199	100
chr8	51108	52986	YHL027W	RIM101	Regulator of IME2	+	1	1878,	Est2-WMC.igv.sorted.bed	chr8	52300	52599	299	100
chr8	53216	54023	YHL026C			-	1	807,	Est2-WMC.igv.sorted.bed	chr8	53500	53599	99	100
chr8	95112	97932	YHL007C	STE20	STErile	-	1	2820,	Est2-WMC.igv.sorted.bed	chr8	95700	95899	199	100
chr8	95112	97932	YHL007C	STE20	STErile	-	1	2820,	Est2-WMC.igv.sorted.bed	chr8	96100	96299	199	100
chr8	99212	100397	YHL004W	MRP4	Mitochondrial Ribosomal Protein	+	1	1185,	Est2-WMC.igv.sorted.bed	chr8	99400	99999	599	100
chr8	120083	121676	YHR007C	ERG11	ERGosterol biosynthesis	-	1	1593,	Est2-WMC.igv.sorted.bed	chr8	120400	120599	199	100
chr8	120083	121676	YHR007C	ERG11	ERGosterol biosynthesis	-	1	1593,	Est2-WMC.igv.sorted.bed	chr8	121000	121299	299	100
chr8	122881	123583	YHR008C	SOD2	SuperOxide Dismutase	-	1	702,	Est2-WMC.igv.sorted.bed	chr8	123200	123399	199	100
chr8	124101	125673	YHR009C	TDA3	Topoisomerase I Damage Affected	-	1	1572,	Est2-WMC.igv.sorted.bed	chr8	124900	125099	199	100
chr8	124101	125673	YHR009C	TDA3	Topoisomerase I Damage Affected	-	1	1572,	Est2-WMC.igv.sorted.bed	chr8	125200	125499	299	100
chr8	140001	141393	YHR018C	ARG4	ARGinine requiring	-	1	1392,	Est2-WMC.igv.sorted.bed	chr8	140800	141099	299	100
chr8	141884	143549	YHR019C	DED81	Defines Essential Domain	-	1	1665,	Est2-WMC.igv.sorted.bed	chr8	142500	143099	599	100
chr8	143986	146053	YHR020W			+	1	2067,	Est2-WMC.igv.sorted.bed	chr8	144700	145099	399	100
chr8	157734	159183	YHR024C	MAS2	Mitochondrial ASsembly	-	1	1449,	Est2-WMC.igv.sorted.bed	chr8	158900	158999	99	100
chr8	159428	160502	YHR025W	THR1	THReonine requiring	+	1	1074,	Est2-WMC.igv.sorted.bed	chr8	160000	160299	299	100
chr8	161720	164702	YHR027C	RPN1	Regulatory Particle Non-ATPase	-	1	2982,	Est2-WMC.igv.sorted.bed	chr8	161800	162199	399	100
chr8	168880	170335	YHR030C	SLT2	Suppressor of the LyTic phenotype	-	1	1455,	Est2-WMC.igv.sorted.bed	chr8	169300	169599	299	100
chr8	173334	175080	YHR032W	ERC1	Ethionine Resistance Conferring	+	1	1746,	Est2-WMC.igv.sorted.bed	chr8	173700	173899	199	100
chr8	175538	176810	YHR033W			+	1	1272,	Est2-WMC.igv.sorted.bed	chr8	176100	176299	199	100
chr8	176955	177990	YHR034C	PIH1	Protein Interacting with Hsp90	-	1	1035,	Est2-WMC.igv.sorted.bed	chr8	177600	177799	199	100
chr8	187163	187670	YHR039C-A	VMA10		-	2	342,3,	Est2-WMC.igv.sorted.bed	chr8	187200	187399	199	100
chr8	189121	189855	YHR041C	SRB2	Suppressor of RNA polymerase B	-	2	619,14,	Est2-WMC.igv.sorted.bed	chr8	189400	189599	199	100
chr8	189121	189855	YHR041C	SRB2	Suppressor of RNA polymerase B	-	2	619,14,	Est2-WMC.igv.sorted.bed	chr8	189400	189599	199	100
chr8	190533	192609	YHR042W	NCP1	NADP-Cytochrome P450 reductase	+	1	2076,	Est2-WMC.igv.sorted.bed	chr8	191000	191699	699	100
chr8	218997	219885	YHR058C	MED6	MEDiator complex	-	1	888,	Est2-WMC.igv.sorted.bed	chr8	219600	219699	99	100
chr8	225525	227142	YHR064C	SSZ1		-	1	1617,	Est2-WMC.igv.sorted.bed	chr8	225900	225999	99	100
chr8	234881	236381	YHR070W	TRM5	tRNA Methyltransferase	+	1	1500,	Est2-WMC.igv.sorted.bed	chr8	235400	235499	99	100
chr8	234881	236381	YHR070W	TRM5	tRNA Methyltransferase	+	1	1500,	Est2-WMC.igv.sorted.bed	chr8	235800	235999	199	100
chr8	234881	236381	YHR070W	TRM5	tRNA Methyltransferase	+	1	1500,	Est2-WMC.igv.sorted.bed	chr8	236100	236199	99	100
chr8	246193	248338	YHR074W	QNS1	glutamine (Q) dependent Nad+ Synthetase	+	1	2145,	Est2-WMC.igv.sorted.bed	chr8	247200	247299	99	100
chr8	246193	248338	YHR074W	QNS1	glutamine (Q) dependent Nad+ Synthetase	+	1	2145,	Est2-WMC.igv.sorted.bed	chr8	247400	247599	199	100
chr8	272627	273617	YHR083W	SAM35	Sorting and Assembly Machinery	+	1	990,	Est2-WMC.igv.sorted.bed	chr8	272900	273399	499	100
chr8	282681	283299	YHR089C	GAR1	Glycine Arginine Rich	-	1	618,	Est2-WMC.igv.sorted.bed	chr8	282700	282899	199	100
chr8	294670	296449	YHR096C	HXT5	HeXose Transporter	-	1	1779,	Est2-WMC.igv.sorted.bed	chr8	295000	295099	99	100
chr8	302762	313997	YHR099W	TRA1	similar to human TRRAP	+	1	11235,	Est2-WMC.igv.sorted.bed	chr8	311000	311299	299	100
chr8	302762	313997	YHR099W	TRA1	similar to human TRRAP	+	1	11235,	Est2-WMC.igv.sorted.bed	chr8	313100	313499	399	100
chr8	316573	319816	YHR102W	KIC1	Kinase that Interacts with Cdc31p	+	1	3243,	Est2-WMC.igv.sorted.bed	chr8	318700	319399	699	100
chr8	328304	330062	YHR108W	GGA2	Golgi-localized	+	1	1758,	Est2-WMC.igv.sorted.bed	chr8	329500	329599	99	100
chr8	336338	337811	YHR113W	APE4		+	1	1473,	Est2-WMC.igv.sorted.bed	chr8	337000	337199	199	100
chr8	363000	364155	YHR129C	ARP1	Actin-Related Protein	-	1	1155,	Est2-WMC.igv.sorted.bed	chr8	363600	363799	199	100
chr8	370722	371598	YHR133C	NSG1		-	1	876,	Est2-WMC.igv.sorted.bed	chr8	371000	371099	99	100
chr8	385510	386488	YHR143W	DSE2	Daughter Specific Expression	+	1	978,	Est2-WMC.igv.sorted.bed	chr8	385700	385999	299	100
chr8	417549	419064	YHR159W	TDA11	Topoisomerase I Damage Affected	+	1	1515,	Est2-WMC.igv.sorted.bed	chr8	418000	418099	99	100
chr8	420373	422287	YHR161C	YAP1801	Yeast Assembly Polypeptide	-	1	1914,	Est2-WMC.igv.sorted.bed	chr8	420700	420999	299	100
chr8	420373	422287	YHR161C	YAP1801	Yeast Assembly Polypeptide	-	1	1914,	Est2-WMC.igv.sorted.bed	chr8	421700	422099	399	100
chr8	456586	457948	YHR177W	ROF1	Regulator Of Fluffy	+	1	1362,	Est2-WMC.igv.sorted.bed	chr8	457700	457799	99	100
chr8	475994	480668	YHR186C	KOG1	Kontroller Of Growth	-	1	4674,	Est2-WMC.igv.sorted.bed	chr8	476600	476799	199	100
chr8	484840	486175	YHR190W	ERG9	ERGosterol biosynthesis	+	1	1335,	Est2-WMC.igv.sorted.bed	chr8	485600	485799	199	100
chr8	499945	501139	YHR201C	PPX1		-	1	1194,	Est2-WMC.igv.sorted.bed	chr8	500300	500499	199	100
chr8	517527	518709	YHR208W	BAT1	Branched-chain Amino acid Transaminase	+	1	1182,	Est2-WMC.igv.sorted.bed	chr8	517800	517999	199	100
chr9	23118	26106	YIL169C	CSS1	Condition Specific Secretion	-	1	2988,	Est2-WMC.igv.sorted.bed	chr9	23500	24099	599	100
chr9	23118	26106	YIL169C	CSS1	Condition Specific Secretion	-	1	2988,	Est2-WMC.igv.sorted.bed	chr9	25600	25699	99	100
chr9	48090	51306	YIL156W	UBP7	UBiquitin-specific Protease	+	1	3216,	Est2-WMC.igv.sorted.bed	chr9	48600	48699	99	100
chr9	53980	55021	YIL154C	IMP2'	Independent of Mitochondrial Particle	-	1	1041,	Est2-WMC.igv.sorted.bed	chr9	54500	54899	399	100
chr9	76353	77283	YIL145C	PAN6	PANtothenate biosynthesis	-	1	930,	Est2-WMC.igv.sorted.bed	chr9	76700	77099	399	100
chr9	83301	84885	YIL142W	CCT2	Chaperonin Containing TCP-1	+	1	1584,	Est2-WMC.igv.sorted.bed	chr9	84100	84299	199	100
chr9	83301	84885	YIL142W	CCT2	Chaperonin Containing TCP-1	+	1	1584,	Est2-WMC.igv.sorted.bed	chr9	84500	84599	99	100
chr9	95064	96375	YIL135C	VHS2	Viable in a Hal3 Sit4 background	-	1	1311,	Est2-WMC.igv.sorted.bed	chr9	95100	95599	499	100
chr9	100780	102235	YIL131C	FKH1	ForK head Homolog	-	1	1455,	Est2-WMC.igv.sorted.bed	chr9	100800	100999	199	100
chr9	128150	129578	YIL123W	SIM1	Start Independent of Mitosis	+	1	1428,	Est2-WMC.igv.sorted.bed	chr9	128300	128399	99	100
chr9	130606	131662	YIL122W	POG1	Promoter Of Growth	+	1	1056,	Est2-WMC.igv.sorted.bed	chr9	131400	131499	99	100
chr9	157381	160162	YIL109C	SEC24	SECretory	-	1	2781,	Est2-WMC.igv.sorted.bed	chr9	157900	158099	199	100
chr9	157381	160162	YIL109C	SEC24	SECretory	-	1	2781,	Est2-WMC.igv.sorted.bed	chr9	159600	159899	299	100
chr9	157381	160162	YIL109C	SEC24	SECretory	-	1	2781,	Est2-WMC.igv.sorted.bed	chr9	159900	159999	99	100
chr9	160883	162974	YIL108W			+	1	2091,	Est2-WMC.igv.sorted.bed	chr9	161400	161899	499	100
chr9	167577	169638	YIL105C	SLM1	Synthetic Lethal with Mss4	-	1	2061,	Est2-WMC.igv.sorted.bed	chr9	169100	169299	199	100
chr9	175303	177247	YIL101C	XBP1	XhoI site-Binding Protein	-	1	1944,	Est2-WMC.igv.sorted.bed	chr9	176900	176999	99	100
chr9	178000	179650	YIL099W	SGA1	Sporulation-specific GlycoAmylase	+	1	1650,	Est2-WMC.igv.sorted.bed	chr9	178300	178799	499	100
chr9	178000	179650	YIL099W	SGA1	Sporulation-specific GlycoAmylase	+	1	1650,	Est2-WMC.igv.sorted.bed	chr9	179100	179299	199	100
chr9	179768	180236	YIL098C	FMC1	Formation of Mitochondrial Complexes	-	1	468,	Est2-WMC.igv.sorted.bed	chr9	179900	180099	199	100
chr9	191026	193192	YIL091C	UTP25	U Three Protein	-	1	2166,	Est2-WMC.igv.sorted.bed	chr9	192700	192999	299	100
chr9	217859	220697	YIL075C	RPN2	Regulatory Particle Non-ATPase	-	1	2838,	Est2-WMC.igv.sorted.bed	chr9	218700	218999	299	100
chr9	255049	255865	YIL053W	GPP1	Glycerol-3-Phosphate Phosphatase	+	1	816,	Est2-WMC.igv.sorted.bed	chr9	255300	255699	399	100
chr9	265113	267822	YIL047C	SYG1	Suppressor of Yeast Gpa1	-	1	2709,	Est2-WMC.igv.sorted.bed	chr9	267500	267699	199	100
chr9	268649	270572	YIL046W	MET30	METhionine requiring	+	1	1923,	Est2-WMC.igv.sorted.bed	chr9	269500	270499	999	100
chr9	274070	275039	YIL043C	CBR1	Cytochrome b Reductase	-	1	969,	Est2-WMC.igv.sorted.bed	chr9	274400	274599	199	100
chr9	275106	276291	YIL042C	PKP1	Protein Kinase of PDH	-	1	1185,	Est2-WMC.igv.sorted.bed	chr9	275600	275899	299	100
chr9	275106	276291	YIL042C	PKP1	Protein Kinase of PDH	-	1	1185,	Est2-WMC.igv.sorted.bed	chr9	276000	276099	99	100
chr9	285664	287428	YIL036W	CST6	Chromosome STability	+	1	1764,	Est2-WMC.igv.sorted.bed	chr9	286000	286099	99	100
chr9	285664	287428	YIL036W	CST6	Chromosome STability	+	1	1764,	Est2-WMC.igv.sorted.bed	chr9	286900	286999	99	100
chr9	292631	295736	YIL031W	ULP2	UbL-specific Protease	+	1	3105,	Est2-WMC.igv.sorted.bed	chr9	292800	293099	299	100
chr9	316765	317930	YIL018W	RPL2B	Ribosomal Protein of the Large subunit	+	2	4,761,	Est2-WMC.igv.sorted.bed	chr9	317200	317299	99	100
chr9	365462	369905	YIR006C	PAN1	Poly(A)-binding protein-dependent poly(A) riboNuclease	-	1	4443,	Est2-WMC.igv.sorted.bed	chr9	365800	365899	99	100
chr9	365462	369905	YIR006C	PAN1	Poly(A)-binding protein-dependent poly(A) riboNuclease	-	1	4443,	Est2-WMC.igv.sorted.bed	chr9	366200	366399	199	100
chr9	365462	369905	YIR006C	PAN1	Poly(A)-binding protein-dependent poly(A) riboNuclease	-	1	4443,	Est2-WMC.igv.sorted.bed	chr9	369200	369399	199	100
chr9	370700	372995	YIR007W	EGH1	Cryptococcus neoformans EGCrP2 Homolog	+	1	2295,	Est2-WMC.igv.sorted.bed	chr9	371700	371999	299	100
chr9	378482	379778	YIR012W	SQT1	Suppressor of QSR1 Truncations	+	1	1296,	Est2-WMC.igv.sorted.bed	chr9	378600	378799	199	100
chr9	378482	379778	YIR012W	SQT1	Suppressor of QSR1 Truncations	+	1	1296,	Est2-WMC.igv.sorted.bed	chr9	378900	379099	199	100
chr9	383552	384116	YIR017C	MET28	METhionine	-	1	564,	Est2-WMC.igv.sorted.bed	chr9	383800	383899	99	100
chr9	389568	393672	YIR019C	FLO11	FLOcculation	-	1	4104,	Est2-WMC.igv.sorted.bed	chr9	390300	390899	599	100
chr9	389568	393672	YIR019C	FLO11	FLOcculation	-	1	4104,	Est2-WMC.igv.sorted.bed	chr9	392500	392799	299	100
chr9	389568	393672	YIR019C	FLO11	FLOcculation	-	1	4104,	Est2-WMC.igv.sorted.bed	chr9	392500	392799	299	100
chr9	389568	393672	YIR019C	FLO11	FLOcculation	-	1	4104,	Est2-WMC.igv.sorted.bed	chr9	392800	393399	599	100
chr9	397290	398382	YIR021W	MRS1	Mitochondrial RNA Splicing	+	1	1092,	Est2-WMC.igv.sorted.bed	chr9	398100	398299	199	100
chr9	408464	410372	YIR028W	DAL4	Degradation of Allantoin	+	1	1908,	Est2-WMC.igv.sorted.bed	chr9	409300	409399	99	100
chr9	413011	414676	YIR031C	DAL7	Degradation of Allantoin	-	1	1665,	Est2-WMC.igv.sorted.bed	chr9	413500	413699	199	100
chr9	413011	414676	YIR031C	DAL7	Degradation of Allantoin	-	1	1665,	Est2-WMC.igv.sorted.bed	chr9	414500	414599	99	100
chr9	421022	421787	YIR035C			-	1	765,	Est2-WMC.igv.sorted.bed	chr9	421300	421599	299	100
chr9	422070	422862	YIR036C	IRC24	Increased Recombination Centers	-	1	792,	Est2-WMC.igv.sorted.bed	chr9	422400	422699	299	100
chr10	60842	63488	YJL198W	PHO90	PHOsphate metabolism	+	1	2646,	Est2-WMC.igv.sorted.bed	chr10	62000	62299	299	100
chr10	60842	63488	YJL198W	PHO90	PHOsphate metabolism	+	1	2646,	Est2-WMC.igv.sorted.bed	chr10	62900	63099	199	100
chr10	80152	81913	YJL186W	MNN5	MaNNosyltransferase	+	1	1761,	Est2-WMC.igv.sorted.bed	chr10	80900	81099	199	100
chr10	92049	94527	YJL176C	SWI3	SWItching deficient	-	1	2478,	Est2-WMC.igv.sorted.bed	chr10	93900	94099	199	100
chr10	165420	172065	YJL130C	URA2	URAcil requiring	-	1	6645,	Est2-WMC.igv.sorted.bed	chr10	166500	166799	299	100
chr10	165420	172065	YJL130C	URA2	URAcil requiring	-	1	6645,	Est2-WMC.igv.sorted.bed	chr10	168200	168399	199	100
chr10	165420	172065	YJL130C	URA2	URAcil requiring	-	1	6645,	Est2-WMC.igv.sorted.bed	chr10	171600	171699	99	100
chr10	177794	179801	YJL128C	PBS2	Polymyxin B Sensitivity	-	1	2007,	Est2-WMC.igv.sorted.bed	chr10	178200	178299	99	100
chr10	314749	315253	YJL065C	DLS1	Dpb3-Like Subunit of ISW2/yCHRAC complex	-	1	504,	Est2-WMC.igv.sorted.bed	chr10	314900	315099	199	100
chr10	315454	316171	YJL063C	MRPL8	Mitochondrial Ribosomal Protein	-	1	717,	Est2-WMC.igv.sorted.bed	chr10	315700	316099	399	100
chr10	337966	338965	YJL052W	TDH1	Triose-phosphate DeHydrogenase	+	1	999,	Est2-WMC.igv.sorted.bed	chr10	338300	338699	399	100
chr10	360944	365141	YJL042W	MHP1	MAP-Homologous Protein	+	1	4197,	Est2-WMC.igv.sorted.bed	chr10	361200	361599	399	100
chr10	365479	368069	YJL041W	NSP1	NucleoSkeletal-like Protein	+	2	1,2471,	Est2-WMC.igv.sorted.bed	chr10	366200	366299	99	100
chr10	398632	402106	YJL020C	BBC1	Bni1 synthetic lethal and Bee1 (las17) Complex member	-	1	3474,	Est2-WMC.igv.sorted.bed	chr10	399900	399999	99	100
chr10	411146	413093	YJL012C	VTC4	Vacuolar Transporter Chaperone	-	1	1947,	Est2-WMC.igv.sorted.bed	chr10	411700	411999	299	100
chr10	419650	421357	YJL008C	CCT8	Chaperonin Containing TCP-1	-	1	1707,	Est2-WMC.igv.sorted.bed	chr10	420100	420299	199	100
chr10	424850	430931	YJL005W	CYR1	CYclic AMP Requirement	+	1	6081,	Est2-WMC.igv.sorted.bed	chr10	426100	426299	199	100
chr10	442601	444554	YJR004C	SAG1	Sexual AGglutination	-	1	1953,	Est2-WMC.igv.sorted.bed	chr10	443700	443999	299	100
chr10	464144	465902	YJR016C	ILV3	IsoLeucine-plus-Valine requiring	-	1	1758,	Est2-WMC.igv.sorted.bed	chr10	464300	464599	299	100
chr10	464144	465902	YJR016C	ILV3	IsoLeucine-plus-Valine requiring	-	1	1758,	Est2-WMC.igv.sorted.bed	chr10	464900	465699	799	100
chr10	466925	467975	YJR019C	TES1	ThioESterase	-	1	1050,	Est2-WMC.igv.sorted.bed	chr10	467200	467699	499	100
chr10	519331	521296	YJR045C	SSC1	Stress-Seventy subfamily C	-	1	1965,	Est2-WMC.igv.sorted.bed	chr10	519400	519599	199	100
chr10	531755	533453	YJR052W	RAD7	RADiation sensitive	+	1	1698,	Est2-WMC.igv.sorted.bed	chr10	532300	532399	99	100
chr10	545480	547937	YJR059W	PTK2	Putative serine/Threonine protein Kinase	+	1	2457,	Est2-WMC.igv.sorted.bed	chr10	547000	547299	299	100
chr10	548452	549508	YJR060W	CBF1	Centromere Binding Factor	+	1	1056,	Est2-WMC.igv.sorted.bed	chr10	548700	548799	99	100
chr10	548452	549508	YJR060W	CBF1	Centromere Binding Factor	+	1	1056,	Est2-WMC.igv.sorted.bed	chr10	548900	549099	199	100
chr10	570660	571818	YJR072C	NPA3	Nucleolar Preribosomal Associated	-	1	1158,	Est2-WMC.igv.sorted.bed	chr10	571000	571099	99	100
chr10	572008	572629	YJR073C	OPI3	OverProducer of Inositol	-	1	621,	Est2-WMC.igv.sorted.bed	chr10	572100	572299	199	100
chr10	572008	572629	YJR073C	OPI3	OverProducer of Inositol	-	1	621,	Est2-WMC.igv.sorted.bed	chr10	572100	572299	199	100
chr10	572788	573445	YJR074W	MOG1	Multicopy suppressor Of ts Gsp1	+	1	657,	Est2-WMC.igv.sorted.bed	chr10	573100	573199	99	100
chr10	578553	579915	YJR078W	BNA2	Biosynthesis of Nicotinic Acid	+	1	1362,	Est2-WMC.igv.sorted.bed	chr10	578600	578799	199	100
chr10	594754	598030	YJR091C	JSN1	Just Say No	-	1	3276,	Est2-WMC.igv.sorted.bed	chr10	595100	595299	199	100
chr10	620447	622142	YJR103W	URA8	URAcil requiring	+	1	1695,	Est2-WMC.igv.sorted.bed	chr10	621200	621499	299	100
chr10	623273	624296	YJR105W	ADO1	ADenOsine kinase	+	1	1023,	Est2-WMC.igv.sorted.bed	chr10	623600	624199	599	100
chr10	635549	636401	YJR111C	PXP2	PeroXisomal Protein	-	1	852,	Est2-WMC.igv.sorted.bed	chr10	635600	635799	199	100
chr10	637926	638670	YJR113C	RSM7	Ribosomal Small subunit of Mitochondria	-	1	744,	Est2-WMC.igv.sorted.bed	chr10	638300	638499	199	100
chr10	663694	664714	YJR129C	EFM3	Elongation Factor Methyltransferase	-	1	1020,	Est2-WMC.igv.sorted.bed	chr10	663900	664299	399	100
chr10	703890	704967	YJR147W	HMS2	High-copy Mep Suppressor	+	1	1077,	Est2-WMC.igv.sorted.bed	chr10	703900	704099	199	100
chr10	703890	704967	YJR147W	HMS2	High-copy Mep Suppressor	+	1	1077,	Est2-WMC.igv.sorted.bed	chr10	704700	704899	199	100
chr10	711949	715435	YJR151C	DAN4	Delayed ANaerobic	-	1	3486,	Est2-WMC.igv.sorted.bed	chr10	714300	714999	699	100
chr11	17358	18339	YKL218C	SRY1	Serine Racemase of Yeast	-	1	981,	Est2-WMC.igv.sorted.bed	chr11	17450	17949	499	100
chr11	22233	24084	YKL217W	JEN1		+	1	1851,	Est2-WMC.igv.sorted.bed	chr11	23050	23549	499	100
chr11	39163	42238	YKL210W	UBA1	UBiquitin Activating	+	1	3075,	Est2-WMC.igv.sorted.bed	chr11	39550	39749	199	100
chr11	100671	106827	YKL182W	FAS1	Fatty Acid Synthetase	+	1	6156,	Est2-WMC.igv.sorted.bed	chr11	101550	101749	199	100
chr11	100671	106827	YKL182W	FAS1	Fatty Acid Synthetase	+	1	6156,	Est2-WMC.igv.sorted.bed	chr11	102750	103249	499	100
chr11	100671	106827	YKL182W	FAS1	Fatty Acid Synthetase	+	1	6156,	Est2-WMC.igv.sorted.bed	chr11	106050	106149	99	100
chr11	164917	165931	YKL151C	NNR2	Nicotinamide Nucleotide Repair	-	1	1014,	Est2-WMC.igv.sorted.bed	chr11	164950	165249	299	100
chr11	169207	171130	YKL148C	SDH1	Succinate DeHydrogenase	-	1	1923,	Est2-WMC.igv.sorted.bed	chr11	169650	170849	1199	100
chr11	226211	228407	YKL112W	ABF1	ARS-Binding Factor 1	+	1	2196,	Est2-WMC.igv.sorted.bed	chr11	226750	226949	199	100
chr11	245779	247324	YKL103C	APE1	AminoPeptidase	-	1	1545,	Est2-WMC.igv.sorted.bed	chr11	246150	246649	499	100
chr11	274923	276639	YKL088W	CAB3	Coenzyme A Biosynthesis	+	1	1716,	Est2-WMC.igv.sorted.bed	chr11	275250	275749	499	100
chr11	278763	279768	YKL085W	MDH1	Malate DeHydrogenase	+	1	1005,	Est2-WMC.igv.sorted.bed	chr11	279150	279449	299	100
chr11	280149	280500	YKL084W	HOT13	Helper Of Tim	+	1	351,	Est2-WMC.igv.sorted.bed	chr11	280250	280449	199	100
chr11	282531	284096	YKL081W	TEF4	Translation Elongation Factor	+	2	205,1034,	Est2-WMC.igv.sorted.bed	chr11	283150	283449	299	100
chr11	282531	284096	YKL081W	TEF4	Translation Elongation Factor	+	2	205,1034,	Est2-WMC.igv.sorted.bed	chr11	283550	284049	499	100
chr11	309839	312719	YKL068W	NUP100	NUclear Pore	+	1	2880,	Est2-WMC.igv.sorted.bed	chr11	311050	311249	199	100
chr11	336177	338394	YKL054C	DEF1	RNAPII DEgradation Factor	-	1	2217,	Est2-WMC.igv.sorted.bed	chr11	336550	336849	299	100
chr11	339308	340187	YKL052C	ASK1	Associated with Spindles and Kinetochores	-	1	879,	Est2-WMC.igv.sorted.bed	chr11	339950	340149	199	100
chr11	369529	371029	YKL035W	UGP1	UDP-glucose pyrophosphorylase	+	1	1500,	Est2-WMC.igv.sorted.bed	chr11	369750	369849	99	100
chr11	379702	381496	YKL032C	IXR1	Intrastrand cross (X)-link Recognition	-	1	1794,	Est2-WMC.igv.sorted.bed	chr11	380050	380249	199	100
chr11	379702	381496	YKL032C	IXR1	Intrastrand cross (X)-link Recognition	-	1	1794,	Est2-WMC.igv.sorted.bed	chr11	380550	380749	199	100
chr11	379702	381496	YKL032C	IXR1	Intrastrand cross (X)-link Recognition	-	1	1794,	Est2-WMC.igv.sorted.bed	chr11	381350	381449	99	100
chr11	382353	384363	YKL029C	MAE1	MAlic Enzyme	-	1	2010,	Est2-WMC.igv.sorted.bed	chr11	383750	384049	299	100
chr11	387199	388543	YKL027W	TCD2	tRNA ThreonylCarbamoyladenosine Dehydratase	+	1	1344,	Est2-WMC.igv.sorted.bed	chr11	387550	387749	199	100
chr11	463596	464586	YKR013W	PRY2	Pathogen Related in Yeast	+	1	990,	Est2-WMC.igv.sorted.bed	chr11	463650	463849	199	100
chr11	463596	464586	YKR013W	PRY2	Pathogen Related in Yeast	+	1	990,	Est2-WMC.igv.sorted.bed	chr11	464450	464549	99	100
chr11	511635	512796	YKR038C	KAE1	Kinase-Associated Endopeptidase	-	1	1161,	Est2-WMC.igv.sorted.bed	chr11	511750	511849	99	100
chr11	523859	524711	YKR046C	PLN1	PeriLipiN	-	1	852,	Est2-WMC.igv.sorted.bed	chr11	524050	524649	599	100
chr11	525023	526277	YKR048C	NAP1	Nucleosome Assembly Protein	-	1	1254,	Est2-WMC.igv.sorted.bed	chr11	525950	526149	199	100
chr11	527451	530121	YKR050W	TRK2	TRansport of potassium (K)	+	1	2670,	Est2-WMC.igv.sorted.bed	chr11	528850	529049	199	100
chr11	527451	530121	YKR050W	TRK2	TRansport of potassium (K)	+	1	2670,	Est2-WMC.igv.sorted.bed	chr11	529150	529349	199	100
chr11	635480	637916	YKR099W	BAS1	BASal	+	1	2436,	Est2-WMC.igv.sorted.bed	chr11	635750	636049	299	100
chr11	645984	649494	YKR102W	FLO10	FLOcculation	+	1	3510,	Est2-WMC.igv.sorted.bed	chr11	646750	646849	99	100
chr11	645984	649494	YKR102W	FLO10	FLOcculation	+	1	3510,	Est2-WMC.igv.sorted.bed	chr11	648050	648249	199	100
chr12	14647	16072	YLL063C	AYT1	AcetYlTransferase	-	1	1425,	Est2-WMC.igv.sorted.bed	chr12	15000	15099	99	100
chr12	100945	105346	YLL021W	SPA2	Spindle Pole Antigen	+	1	4401,	Est2-WMC.igv.sorted.bed	chr12	103700	103899	199	100
chr12	100945	105346	YLL021W	SPA2	Spindle Pole Antigen	+	1	4401,	Est2-WMC.igv.sorted.bed	chr12	104000	104199	199	100
chr12	105684	107898	YLL019C	KNS1	Kinase Next to SPA2	-	1	2214,	Est2-WMC.igv.sorted.bed	chr12	105700	105899	199	100
chr12	105684	107898	YLL019C	KNS1	Kinase Next to SPA2	-	1	2214,	Est2-WMC.igv.sorted.bed	chr12	107100	107399	299	100
chr12	105684	107898	YLL019C	KNS1	Kinase Next to SPA2	-	1	2214,	Est2-WMC.igv.sorted.bed	chr12	107600	107699	99	100
chr12	131727	133986	YLL008W	DRS1	Deficiency of Ribosomal Subunits	+	1	2259,	Est2-WMC.igv.sorted.bed	chr12	132400	132499	99	100
chr12	131727	133986	YLL008W	DRS1	Deficiency of Ribosomal Subunits	+	1	2259,	Est2-WMC.igv.sorted.bed	chr12	132800	132899	99	100
chr12	177606	178620	YLR017W	MEU1	Multicopy Enhancer of UAS2	+	1	1014,	Est2-WMC.igv.sorted.bed	chr12	178000	178299	299	100
chr12	195450	196473	YLR026C	SED5	Suppressor of Erd2 Deletion	-	1	1023,	Est2-WMC.igv.sorted.bed	chr12	195900	196099	199	100
chr12	242232	243350	YLR048W	RPS0B	Ribosomal Protein of the Small subunit	+	2	90,669,	Est2-WMC.igv.sorted.bed	chr12	242700	242799	99	100
chr12	251272	253081	YLR055C	SPT8	SuPpressor of Ty	-	1	1809,	Est2-WMC.igv.sorted.bed	chr12	252100	252699	599	100
chr12	259738	260548	YLR059C	REX2	Rna EXonuclease	-	1	810,	Est2-WMC.igv.sorted.bed	chr12	259900	260299	399	100
chr12	260979	262767	YLR060W	FRS1	phenylalanyl (F)-tRNA Synthetase	+	1	1788,	Est2-WMC.igv.sorted.bed	chr12	261800	262099	299	100
chr12	323544	326226	YLR092W	SUL2	SULfate	+	1	2682,	Est2-WMC.igv.sorted.bed	chr12	324100	324399	299	100
chr12	327730	329239	YLR094C	GIS3	GIg1-2 Suppressor	-	1	1509,	Est2-WMC.igv.sorted.bed	chr12	328400	328499	99	100
chr12	327730	329239	YLR094C	GIS3	GIg1-2 Suppressor	-	1	1509,	Est2-WMC.igv.sorted.bed	chr12	328700	328999	299	100
chr12	336231	337266	YLR097C	HRT3	High level expression Reduces Ty3 transposition	-	1	1035,	Est2-WMC.igv.sorted.bed	chr12	337000	337099	99	100
chr12	339744	340929	YLR099C	ICT1	Increased Copper Tolerance	-	1	1185,	Est2-WMC.igv.sorted.bed	chr12	340600	340899	299	100
chr12	341810	342854	YLR100W	ERG27	ERGosterol biosynthesis	+	1	1044,	Est2-WMC.igv.sorted.bed	chr12	342200	342399	199	100
chr12	342970	343768	YLR102C	APC9	Anaphase Promoting Complex	-	1	798,	Est2-WMC.igv.sorted.bed	chr12	343400	343599	199	100
chr12	349006	363739	YLR106C	MDN1	MiDasiN	-	1	14733,	Est2-WMC.igv.sorted.bed	chr12	351000	351299	299	100
chr12	374944	377239	YLR114C	AVL9	Apl2 Vps1 Lethal	-	1	2295,	Est2-WMC.igv.sorted.bed	chr12	375000	375399	399	100
chr12	410723	412415	YLR134W	PDC5	Pyruvate DeCarboxylase	+	1	1692,	Est2-WMC.igv.sorted.bed	chr12	411100	411499	399	100
chr12	418437	421395	YLR138W	NHA1	Na+/H+ Antiporter	+	1	2958,	Est2-WMC.igv.sorted.bed	chr12	419900	420299	399	100
chr12	445524	447576	YLR153C	ACS2	Acetyl CoA Synthetase	-	1	2052,	Est2-WMC.igv.sorted.bed	chr12	445900	446499	599	100
chr12	506135	507587	YLR175W	CBF5	Centromere Binding Factor	+	1	1452,	Est2-WMC.igv.sorted.bed	chr12	506400	506699	299	100
chr12	511055	512942	YLR177W			+	1	1887,	Est2-WMC.igv.sorted.bed	chr12	511400	511599	199	100
chr12	515263	516412	YLR180W	SAM1	S-AdenosylMethionine requiring	+	1	1149,	Est2-WMC.igv.sorted.bed	chr12	515600	515799	199	100
chr12	515263	516412	YLR180W	SAM1	S-AdenosylMethionine requiring	+	1	1149,	Est2-WMC.igv.sorted.bed	chr12	516200	516299	99	100
chr12	535215	536691	YLR190W	MMR1	Mitochondrial Myo2p Receptor-related	+	1	1476,	Est2-WMC.igv.sorted.bed	chr12	535800	535999	199	100
chr12	546098	547613	YLR197W	NOP56	NucleOlar Protein of 56.8 kDa	+	1	1515,	Est2-WMC.igv.sorted.bed	chr12	546700	546799	99	100
chr12	554577	556419	YLR206W	ENT2	Epsin N-Terminal homology	+	1	1842,	Est2-WMC.igv.sorted.bed	chr12	555400	555899	499	100
chr12	566653	567922	YLR213C	CRR1	CRH-Related	-	1	1269,	Est2-WMC.igv.sorted.bed	chr12	567000	567399	399	100
chr12	612366	614163	YLR237W	THI7	THIamine metabolism	+	1	1797,	Est2-WMC.igv.sorted.bed	chr12	613300	613399	99	100
chr12	646414	650923	YLR256W	HAP1	Heme Activator Protein	+	1	4509,	Est2-WMC.igv.sorted.bed	chr12	647100	648099	999	100
chr12	658825	659791	YLR257W			+	1	966,	Est2-WMC.igv.sorted.bed	chr12	659300	659499	199	100
chr12	699998	704024	YLR278C			-	1	4026,	Est2-WMC.igv.sorted.bed	chr12	703500	703799	299	100
chr12	728954	730301	YLR300W	EXG1	EXo-1	+	1	1347,	Est2-WMC.igv.sorted.bed	chr12	729900	729999	99	100
chr12	735211	737548	YLR304C	ACO1	ACOnitase	-	1	2337,	Est2-WMC.igv.sorted.bed	chr12	736300	737099	799	100
chr12	762574	764137	YLR314C	CDC3	Cell Division Cycle	-	1	1563,	Est2-WMC.igv.sorted.bed	chr12	763900	764099	199	100
chr12	778172	778952	YLR323C	CWC24	Complexed With Cef1p	-	1	780,	Est2-WMC.igv.sorted.bed	chr12	778400	778499	99	100
chr12	790675	791806	YLR332W	MID2	Mating pheromone-Induced Death	+	1	1131,	Est2-WMC.igv.sorted.bed	chr12	790900	790999	99	100
chr12	805886	806825	YLR340W	RPP0	Ribosomal Protein P0	+	1	939,	Est2-WMC.igv.sorted.bed	chr12	806500	806799	299	100
chr12	805886	806825	YLR340W	RPP0	Ribosomal Protein P0	+	1	939,	Est2-WMC.igv.sorted.bed	chr12	806500	806799	299	100
chr12	809996	815627	YLR342W	FKS1	FK506 Sensitivity	+	1	5631,	Est2-WMC.igv.sorted.bed	chr12	810200	810399	199	100
chr12	809996	815627	YLR342W	FKS1	FK506 Sensitivity	+	1	5631,	Est2-WMC.igv.sorted.bed	chr12	814600	814899	299	100
chr12	809996	815627	YLR342W	FKS1	FK506 Sensitivity	+	1	5631,	Est2-WMC.igv.sorted.bed	chr12	815100	815299	199	100
chr12	826975	827872	YLR348C	DIC1	DIcarboxylate Carrier	-	1	897,	Est2-WMC.igv.sorted.bed	chr12	827200	827599	399	100
chr12	829487	830363	YLR351C	NIT3	NITrilase superfamily	-	1	876,	Est2-WMC.igv.sorted.bed	chr12	829800	829999	199	100
chr12	878281	879508	YLR380W	CSR1	Chs5 Spa2 Rescue	+	1	1227,	Est2-WMC.igv.sorted.bed	chr12	878800	879199	399	100
chr12	879722	881924	YLR381W	CTF3	Chromosome Transmission Fidelity	+	1	2202,	Est2-WMC.igv.sorted.bed	chr12	879800	880199	399	100
chr12	882066	884751	YLR382C	NAM2	Nuclear Accommodation of Mitochondria	-	1	2685,	Est2-WMC.igv.sorted.bed	chr12	883400	883499	99	100
chr12	922616	924446	YLR401C	DUS3	DihydroUridine Synthase	-	1	1830,	Est2-WMC.igv.sorted.bed	chr12	923100	923399	299	100
chr12	937536	940977	YLR410W	VIP1		+	1	3441,	Est2-WMC.igv.sorted.bed	chr12	937700	937999	299	100
chr12	951150	953178	YLR413W	INA1	INdicator of Abscission	+	1	2028,	Est2-WMC.igv.sorted.bed	chr12	951200	951499	299	100
chr12	990771	992727	YLR429W	CRN1	CoRoNin	+	1	1956,	Est2-WMC.igv.sorted.bed	chr12	992100	992199	99	100
chr12	993428	1000124	YLR430W	SEN1	Splicing ENdonuclease	+	1	6696,	Est2-WMC.igv.sorted.bed	chr12	999800	999899	99	100
chr12	1002551	1004123	YLR432W	IMD3	IMP Dehydrogenase	+	1	1572,	Est2-WMC.igv.sorted.bed	chr12	1002800	1003099	299	100
chr12	1007415	1011240	YLR436C	ECM30	ExtraCellular Mutant	-	1	3825,	Est2-WMC.igv.sorted.bed	chr12	1010700	1010899	199	100
chr12	1011616	1012018	YLR437C	DIF1	Damage-regulated Import Facilitator	-	1	402,	Est2-WMC.igv.sorted.bed	chr12	1011800	1011999	199	100
chr12	1012495	1013770	YLR438W	CAR2	Catabolism of ARginine	+	1	1275,	Est2-WMC.igv.sorted.bed	chr12	1013000	1013199	199	100
chr12	1012495	1013770	YLR438W	CAR2	Catabolism of ARginine	+	1	1275,	Est2-WMC.igv.sorted.bed	chr12	1013300	1013499	199	100
chr12	1014485	1015445	YLR439W	MRPL4	Mitochondrial Ribosomal Protein	+	1	960,	Est2-WMC.igv.sorted.bed	chr12	1014800	1015299	499	100
chr12	1036087	1038748	YLR451W	LEU3	LEUcine biosynthesis	+	1	2661,	Est2-WMC.igv.sorted.bed	chr12	1038200	1038599	399	100
chr13	15135	16677	YML128C	MSC1	Meiotic Sister-Chromatid recombination	-	1	1542,	Est2-WMC.igv.sorted.bed	chr13	16000	16199	199	100
chr13	19060	20536	YML126C	ERG13	ERGosterol biosynthesis	-	1	1476,	Est2-WMC.igv.sorted.bed	chr13	20100	20299	199	100
chr13	22048	23684	YML124C	TUB3	TUBulin	-	2	1313,25,	Est2-WMC.igv.sorted.bed	chr13	23000	23099	99	100
chr13	45062	45953	YML112W	CTK3	Carboxy-Terminal domain Kinase	+	1	891,	Est2-WMC.igv.sorted.bed	chr13	45200	45499	299	100
chr13	51639	54468	YML109W	ZDS2	Zillion Different Screens	+	1	2829,	Est2-WMC.igv.sorted.bed	chr13	53400	53499	99	100
chr13	51639	54468	YML109W	ZDS2	Zillion Different Screens	+	1	2829,	Est2-WMC.igv.sorted.bed	chr13	53700	53799	99	100
chr13	68293	69700	YML102W	CAC2	Chromatin Assembly Complex	+	1	1407,	Est2-WMC.igv.sorted.bed	chr13	68800	68899	99	100
chr13	99793	101050	YML083C			-	1	1257,	Est2-WMC.igv.sorted.bed	chr13	100700	100799	99	100
chr13	120088	121324	YML074C	FPR3	Fk 506-sensitive Proline Rotamase	-	1	1236,	Est2-WMC.igv.sorted.bed	chr13	120200	120799	599	100
chr13	123226	124172	YML073C	RPL6A	Ribosomal Protein of the Large subunit	-	2	516,15,	Est2-WMC.igv.sorted.bed	chr13	123400	123599	199	100
chr13	146481	147249	YML063W	RPS1B	Ribosomal Protein of the Small subunit	+	1	768,	Est2-WMC.igv.sorted.bed	chr13	146800	147099	299	100
chr13	153218	158258	YML059C	NTE1	Neuropathy Target Esterase	-	1	5040,	Est2-WMC.igv.sorted.bed	chr13	157200	157899	699	100
chr13	162193	164176	YML056C	IMD4	IMP Dehydrogenase	-	2	1115,460,	Est2-WMC.igv.sorted.bed	chr13	162400	162799	399	100
chr13	170401	171310	YML052W	SUR7	SUppressor of Rvs167 mutation	+	1	909,	Est2-WMC.igv.sorted.bed	chr13	170800	170999	199	100
chr13	209524	212155	YML034W	SRC1	Spliced mRNA and Cell cycle regulated gene	+	2	1920,585,	Est2-WMC.igv.sorted.bed	chr13	210300	210399	99	100
chr13	247676	250868	YML010W	SPT5	SuPpressor of Ty's	+	1	3192,	Est2-WMC.igv.sorted.bed	chr13	248300	248399	99	100
chr13	247676	250868	YML010W	SPT5	SuPpressor of Ty's	+	1	3192,	Est2-WMC.igv.sorted.bed	chr13	250400	250599	199	100
chr13	247676	250868	YML010W	SPT5	SuPpressor of Ty's	+	1	3192,	Est2-WMC.igv.sorted.bed	chr13	250600	250699	99	100
chr13	277560	279681	YMR006C	PLB2	PhosphoLipase B	-	1	2121,	Est2-WMC.igv.sorted.bed	chr13	279000	279499	499	100
chr13	280589	282584	YMR008C	PLB1	PhosphoLipase B	-	1	1995,	Est2-WMC.igv.sorted.bed	chr13	282200	282399	199	100
chr13	303234	305592	YMR016C	SOK2	Suppressor Of Kinase	-	1	2358,	Est2-WMC.igv.sorted.bed	chr13	304900	305199	299	100
chr13	352601	353135	YMR042W	ARG80	ARGinine requiring	+	1	534,	Est2-WMC.igv.sorted.bed	chr13	352800	352999	199	100
chr13	353869	354730	YMR043W	MCM1	MiniChromosome Maintenance	+	1	861,	Est2-WMC.igv.sorted.bed	chr13	354200	354299	99	100
chr13	388820	390731	YMR058W	FET3	FErrous Transport	+	1	1911,	Est2-WMC.igv.sorted.bed	chr13	389400	389599	199	100
chr13	463932	464826	YMR099C			-	1	894,	Est2-WMC.igv.sorted.bed	chr13	464300	464499	199	100
chr13	469846	472351	YMR102C			-	1	2505,	Est2-WMC.igv.sorted.bed	chr13	470200	470499	299	100
chr13	475895	477605	YMR105C	PGM2	PhosphoGlucoMutase	-	1	1710,	Est2-WMC.igv.sorted.bed	chr13	476800	476899	99	100
chr13	484082	486146	YMR108W	ILV2	IsoLeucine-plus-Valine requiring	+	1	2064,	Est2-WMC.igv.sorted.bed	chr13	484300	484499	199	100
chr13	484082	486146	YMR108W	ILV2	IsoLeucine-plus-Valine requiring	+	1	2064,	Est2-WMC.igv.sorted.bed	chr13	484600	484799	199	100
chr13	484082	486146	YMR108W	ILV2	IsoLeucine-plus-Valine requiring	+	1	2064,	Est2-WMC.igv.sorted.bed	chr13	485000	485199	199	100
chr13	490392	491991	YMR110C	HFD1	Homolog of Fatty aldehyde Dehydrogenase	-	1	1599,	Est2-WMC.igv.sorted.bed	chr13	491500	491599	99	100
chr13	492402	493791	YMR111C			-	1	1389,	Est2-WMC.igv.sorted.bed	chr13	493000	493099	99	100
chr13	533161	534697	YMR131C	RRB1	Regulator of Ribosome Biogenesis	-	1	1536,	Est2-WMC.igv.sorted.bed	chr13	534300	534499	199	100
chr13	538687	540055	YMR135C	GID8	Glucose Induced Degradation deficient	-	1	1368,	Est2-WMC.igv.sorted.bed	chr13	539700	539899	199	100
chr13	546123	547236	YMR139W	RIM11	Regulator of IME2	+	1	1113,	Est2-WMC.igv.sorted.bed	chr13	546500	546799	299	100
chr13	587272	589549	YMR164C	MSS11	Multicopy Suppressor of STA genes	-	1	2277,	Est2-WMC.igv.sorted.bed	chr13	588500	588799	299	100
chr13	593365	594472	YMR166C	MME1	Mitochondrial Magnesium Exporter	-	1	1107,	Est2-WMC.igv.sorted.bed	chr13	593600	593699	99	100
chr13	626919	627807	YMR183C	SSO2	Supressor of Sec One	-	1	888,	Est2-WMC.igv.sorted.bed	chr13	627100	627699	599	100
chr13	640913	645257	YMR190C	SGS1	Slow Growth Suppressor	-	1	4344,	Est2-WMC.igv.sorted.bed	chr13	644500	644599	99	100
chr13	667535	668204	YMR202W	ERG2	ERGosterol biosynthesis	+	1	669,	Est2-WMC.igv.sorted.bed	chr13	668000	668199	199	100
chr13	671885	674765	YMR205C	PFK2	PhosphoFructoKinase	-	1	2880,	Est2-WMC.igv.sorted.bed	chr13	673700	674099	399	100
chr13	675894	676836	YMR206W			+	1	942,	Est2-WMC.igv.sorted.bed	chr13	676100	676499	399	100
chr13	695348	696482	YMR214W	SCJ1	S. Cerevisiae DnaJ	+	1	1134,	Est2-WMC.igv.sorted.bed	chr13	695800	695899	99	100
chr13	698809	701038	YMR216C	SKY1	SRPK1-like Kinase in Yeast	-	1	2229,	Est2-WMC.igv.sorted.bed	chr13	700600	700999	399	100
chr13	701788	703366	YMR217W	GUA1	GUanine Auxotroph	+	1	1578,	Est2-WMC.igv.sorted.bed	chr13	702200	702499	299	100
chr13	722611	724384	YMR227C	TAF7	TATA binding protein-Associated Factor	-	1	1773,	Est2-WMC.igv.sorted.bed	chr13	723000	723099	99	100
chr13	725932	731122	YMR229C	RRP5	Ribosomal RNA Processing	-	1	5190,	Est2-WMC.igv.sorted.bed	chr13	726800	727099	299	100
chr13	733543	736633	YMR231W	PEP5	carboxyPEPtidase Y-deficient	+	1	3090,	Est2-WMC.igv.sorted.bed	chr13	735300	735699	399	100
chr13	757248	758316	YMR244W			+	1	1068,	Est2-WMC.igv.sorted.bed	chr13	757700	757799	99	100
chr13	770799	772557	YMR250W	GAD1	GlutAmate Decarboxylase	+	1	1758,	Est2-WMC.igv.sorted.bed	chr13	771300	771399	99	100
chr13	820255	822454	YMR277W	FCP1	tfiiF-associating component of Ctd Phosphatase	+	1	2199,	Est2-WMC.igv.sorted.bed	chr13	820400	820699	299	100
chr13	820255	822454	YMR277W	FCP1	tfiiF-associating component of Ctd Phosphatase	+	1	2199,	Est2-WMC.igv.sorted.bed	chr13	820900	821099	199	100
chr13	859214	860891	YMR296C	LCB1	Long-Chain Base	-	1	1677,	Est2-WMC.igv.sorted.bed	chr13	859700	859999	299	100
chr13	859214	860891	YMR296C	LCB1	Long-Chain Base	-	1	1677,	Est2-WMC.igv.sorted.bed	chr13	860200	860299	99	100
chr13	861921	863520	YMR297W	PRC1	PRoteinase C	+	1	1599,	Est2-WMC.igv.sorted.bed	chr13	862200	862499	299	100
chr13	873290	874337	YMR303C	ADH2	Alcohol DeHydrogenase	-	1	1047,	Est2-WMC.igv.sorted.bed	chr13	873600	873999	399	100
chr13	873290	874337	YMR303C	ADH2	Alcohol DeHydrogenase	-	1	1047,	Est2-WMC.igv.sorted.bed	chr13	874100	874199	99	100
chr13	887002	888682	YMR307W	GAS1	Glycophospholipid-Anchored Surface protein	+	1	1680,	Est2-WMC.igv.sorted.bed	chr13	888200	888499	299	100
chr13	888951	892221	YMR308C	PSE1	Protein Secretion Enhancer	-	1	3270,	Est2-WMC.igv.sorted.bed	chr13	891100	891399	299	100
chr13	907362	910785	YMR317W			+	1	3423,	Est2-WMC.igv.sorted.bed	chr13	908600	908999	399	100
chr13	911059	912142	YMR318C	ADH6	Alcohol DeHydrogenase	-	1	1083,	Est2-WMC.igv.sorted.bed	chr13	911200	911799	599	100
chr14	24046	27172	YNL327W	EGT2	Early G1 Transcript	+	1	3126,	Est2-WMC.igv.sorted.bed	chr14	26000	26599	599	100
chr14	34694	37421	YNL321W	VNX1	Vacuolar Na+/H+ eXchanger	+	1	2727,	Est2-WMC.igv.sorted.bed	chr14	34900	35099	199	100
chr14	34694	37421	YNL321W	VNX1	Vacuolar Na+/H+ eXchanger	+	1	2727,	Est2-WMC.igv.sorted.bed	chr14	36700	36899	199	100
chr14	52660	53923	YNL309W	STB1	Sin Three Binding protein	+	1	1263,	Est2-WMC.igv.sorted.bed	chr14	53500	53599	99	100
chr14	58897	59791	YNL305C	BXI1	BaX Inhibitor	-	1	894,	Est2-WMC.igv.sorted.bed	chr14	59300	59499	199	100
chr14	105181	106693	YNL283C	WSC2	cell Wall integrity and Stress response Component	-	1	1512,	Est2-WMC.igv.sorted.bed	chr14	106000	106099	99	100
chr14	109092	110409	YNL280C	ERG24	ERGosterol biosynthesis	-	1	1317,	Est2-WMC.igv.sorted.bed	chr14	109700	109799	99	100
chr14	113268	116451	YNL278W	CAF120	CCR4 Associated Factor	+	1	3183,	Est2-WMC.igv.sorted.bed	chr14	115400	115999	599	100
chr14	117346	118807	YNL277W	MET2	METhionine requiring	+	1	1461,	Est2-WMC.igv.sorted.bed	chr14	118000	118299	299	100
chr14	172586	174314	YNL251C	NRD1	Nuclear pre-mRNA Down-regulation	-	1	1728,	Est2-WMC.igv.sorted.bed	chr14	172900	173199	299	100
chr14	172586	174314	YNL251C	NRD1	Nuclear pre-mRNA Down-regulation	-	1	1728,	Est2-WMC.igv.sorted.bed	chr14	173300	173499	199	100
chr14	188049	190956	YNL243W	SLA2	Synthetic Lethal with ABP1	+	1	2907,	Est2-WMC.igv.sorted.bed	chr14	188400	188599	199	100
chr14	188049	190956	YNL243W	SLA2	Synthetic Lethal with ABP1	+	1	2907,	Est2-WMC.igv.sorted.bed	chr14	189900	190399	499	100
chr14	188049	190956	YNL243W	SLA2	Synthetic Lethal with ABP1	+	1	2907,	Est2-WMC.igv.sorted.bed	chr14	190600	190699	99	100
chr14	191322	196101	YNL242W	ATG2	AuTophaGy related	+	1	4779,	Est2-WMC.igv.sorted.bed	chr14	195500	195799	299	100
chr14	198500	199976	YNL240C	NAR1	Nuclear Architecture Related	-	1	1476,	Est2-WMC.igv.sorted.bed	chr14	199000	199499	499	100
chr14	241687	244171	YNL216W	RAP1	Repressor/Activator site binding Protein	+	1	2484,	Est2-WMC.igv.sorted.bed	chr14	242200	242399	199	100
chr14	267604	269590	YNL197C	WHI3	WHIskey	-	1	1986,	Est2-WMC.igv.sorted.bed	chr14	268000	268399	399	100
chr14	274363	276040	YNL193W			+	1	1677,	Est2-WMC.igv.sorted.bed	chr14	275000	275099	99	100
chr14	318026	318806	YNL168C	FMP41	Found in Mitochondrial Proteome	-	1	780,	Est2-WMC.igv.sorted.bed	chr14	318200	318499	299	100
chr14	343632	345273	YNL154C	YCK2	Yeast Casein Kinase	-	1	1641,	Est2-WMC.igv.sorted.bed	chr14	344100	344299	199	100
chr14	349903	350668	YNL148C	ALF1	ALpha tubulin Folding	-	1	765,	Est2-WMC.igv.sorted.bed	chr14	350500	350599	99	100
chr14	357449	358949	YNL142W	MEP2		+	1	1500,	Est2-WMC.igv.sorted.bed	chr14	358000	358699	699	100
chr14	366737	368318	YNL138W	SRV2	Suppressor of RasVal19	+	1	1581,	Est2-WMC.igv.sorted.bed	chr14	367800	367899	99	100
chr14	390142	392164	YNL125C	ESBP6		-	1	2022,	Est2-WMC.igv.sorted.bed	chr14	391300	391599	299	100
chr14	392888	394367	YNL124W	NAF1	Nuclear Assembly Factor	+	1	1479,	Est2-WMC.igv.sorted.bed	chr14	394100	394199	99	100
chr14	408337	409906	YNL116W	DMA2	Defective in Mitotic Arrest	+	1	1569,	Est2-WMC.igv.sorted.bed	chr14	408900	409099	199	100
chr14	413635	416278	YNL112W	DBP2	Dead Box Protein	+	2	1273,368,	Est2-WMC.igv.sorted.bed	chr14	414000	414299	299	100
chr14	413635	416278	YNL112W	DBP2	Dead Box Protein	+	2	1273,368,	Est2-WMC.igv.sorted.bed	chr14	414400	414599	199	100
chr14	427731	429750	YNL103W	MET4	METhionine requiring	+	1	2019,	Est2-WMC.igv.sorted.bed	chr14	428000	428199	199	100
chr14	476928	478029	YNL080C	EOS1	ER-localized and Oxidants Sensitive	-	1	1101,	Est2-WMC.igv.sorted.bed	chr14	477100	477299	199	100
chr14	476928	478029	YNL080C	EOS1	ER-localized and Oxidants Sensitive	-	1	1101,	Est2-WMC.igv.sorted.bed	chr14	477500	477599	99	100
chr14	476928	478029	YNL080C	EOS1	ER-localized and Oxidants Sensitive	-	1	1101,	Est2-WMC.igv.sorted.bed	chr14	477700	477999	299	100
chr14	479764	480988	YNL078W	NIS1	Neck protein Interacting with Septins	+	1	1224,	Est2-WMC.igv.sorted.bed	chr14	480000	480299	299	100
chr14	488382	490113	YNL073W	MSK1	Mitochondrial aminoacyl-tRNA Synthetase	+	1	1731,	Est2-WMC.igv.sorted.bed	chr14	489500	489699	199	100
chr14	490313	491237	YNL072W	RNH201	RNase H	+	1	924,	Est2-WMC.igv.sorted.bed	chr14	490600	490699	99	100
chr14	491519	492968	YNL071W	LAT1		+	1	1449,	Est2-WMC.igv.sorted.bed	chr14	491900	492499	599	100
chr14	503720	505481	YNL065W	AQR1	Acids Quinidine Resistance	+	1	1761,	Est2-WMC.igv.sorted.bed	chr14	504200	504599	399	100
chr14	505863	507093	YNL064C	YDJ1	Yeast dnaJ	-	1	1230,	Est2-WMC.igv.sorted.bed	chr14	506400	506599	199	100
chr14	517989	518841	YNL055C	POR1	PORin	-	1	852,	Est2-WMC.igv.sorted.bed	chr14	518600	518799	199	100
chr14	529937	531407	YNL053W	MSG5	Multicopy Suppressor of GPA1	+	1	1470,	Est2-WMC.igv.sorted.bed	chr14	530100	530399	299	100
chr14	529937	531407	YNL053W	MSG5	Multicopy Suppressor of GPA1	+	1	1470,	Est2-WMC.igv.sorted.bed	chr14	531100	531299	199	100
chr14	557915	558998	YNL037C	IDH1	Isocitrate DeHydrogenase	-	1	1083,	Est2-WMC.igv.sorted.bed	chr14	558300	558399	99	100
chr14	570472	572311	YNL034W			+	1	1839,	Est2-WMC.igv.sorted.bed	chr14	570700	571299	599	100
chr14	579575	581612	YNL027W	CRZ1	Calcineurin-Responsive Zinc finger	+	1	2037,	Est2-WMC.igv.sorted.bed	chr14	579900	579999	99	100
chr14	602902	604264	YNL016W	PUB1	PolyUridylate Binding	+	1	1362,	Est2-WMC.igv.sorted.bed	chr14	603800	604099	299	100
chr14	640392	642378	YNR008W	LRO1	Lecithin cholesterol acyl transferase Related Open reading frame	+	1	1986,	Est2-WMC.igv.sorted.bed	chr14	642000	642199	199	100
chr14	649024	651709	YNR013C	PHO91	PHOsphate metabolism	-	1	2685,	Est2-WMC.igv.sorted.bed	chr14	651200	651299	99	100
chr14	653383	654538	YNR015W	SMM1	Suppressor of Mitochondrial Mutation	+	1	1155,	Est2-WMC.igv.sorted.bed	chr14	653700	653899	199	100
chr14	654669	661371	YNR016C	ACC1	Acetyl-CoA Carboxylase	-	1	6702,	Est2-WMC.igv.sorted.bed	chr14	654800	654999	199	100
chr14	654669	661371	YNR016C	ACC1	Acetyl-CoA Carboxylase	-	1	6702,	Est2-WMC.igv.sorted.bed	chr14	655600	656299	699	100
chr14	664266	664941	YNR018W	RCF2	Respiratory superComplex Factor	+	1	675,	Est2-WMC.igv.sorted.bed	chr14	664600	664899	299	100
chr14	703695	705873	YNR044W	AGA1	a-AGglutinin	+	1	2178,	Est2-WMC.igv.sorted.bed	chr14	704400	704599	199	100
chr14	708519	711201	YNR047W	FPK1	FliPase Kinase 1	+	1	2682,	Est2-WMC.igv.sorted.bed	chr14	709000	709199	199	100
chr14	733350	734064	YNR057C	BIO4	BIOtin	-	1	714,	Est2-WMC.igv.sorted.bed	chr14	733600	733799	199	100
chr15	19489	21310	YOL158C	ENB1	ENteroBactin	-	1	1821,	Est2-WMC.igv.sorted.bed	chr15	20050	20149	99	100
chr15	19489	21310	YOL158C	ENB1	ENteroBactin	-	1	1821,	Est2-WMC.igv.sorted.bed	chr15	20750	21049	299	100
chr15	28701	31605	YOL155C	HPF1	Haze Protective Factor	-	1	2904,	Est2-WMC.igv.sorted.bed	chr15	29750	29949	199	100
chr15	28701	31605	YOL155C	HPF1	Haze Protective Factor	-	1	2904,	Est2-WMC.igv.sorted.bed	chr15	30250	30449	199	100
chr15	34656	35406	YOL154W	ZPS1	Zinc- and pH-regulated Surface protein	+	1	750,	Est2-WMC.igv.sorted.bed	chr15	34750	35149	399	100
chr15	53095	54550	YOL144W	NOP8	NucleOlar Protein	+	1	1455,	Est2-WMC.igv.sorted.bed	chr15	54050	54349	299	100
chr15	74398	76978	YOL130W	ALR1	ALuminum Resistance	+	1	2580,	Est2-WMC.igv.sorted.bed	chr15	74550	74949	399	100
chr15	74398	76978	YOL130W	ALR1	ALuminum Resistance	+	1	2580,	Est2-WMC.igv.sorted.bed	chr15	75250	75349	99	100
chr15	80346	81189	YOL127W	RPL25	Ribosomal Protein of the Large subunit	+	2	13,416,	Est2-WMC.igv.sorted.bed	chr15	80650	80749	99	100
chr15	162354	165330	YOL084W	PHM7	PHosphate Metabolism	+	1	2976,	Est2-WMC.igv.sorted.bed	chr15	162450	162649	199	100
chr15	197218	198724	YOL070C	NBA1	Nap1p and Bud neck Associated	-	1	1506,	Est2-WMC.igv.sorted.bed	chr15	197650	197949	299	100
chr15	197218	198724	YOL070C	NBA1	Nap1p and Bud neck Associated	-	1	1506,	Est2-WMC.igv.sorted.bed	chr15	198250	198549	299	100
chr15	201983	202517	YOL067C	RTG1	ReTroGrade regulation	-	1	534,	Est2-WMC.igv.sorted.bed	chr15	202250	202349	99	100
chr15	202694	204470	YOL066C	RIB2	RIBoflavin biosynthesis	-	1	1776,	Est2-WMC.igv.sorted.bed	chr15	203450	204049	599	100
chr15	207390	210264	YOL063C	CRT10	Constitutive RNR Transcription regulators	-	1	2874,	Est2-WMC.igv.sorted.bed	chr15	207550	207849	299	100
chr15	212242	213733	YOL061W	PRS5	PhosphoRibosylpyrophosphate Synthetase	+	1	1491,	Est2-WMC.igv.sorted.bed	chr15	212650	212849	199	100
chr15	212242	213733	YOL061W	PRS5	PhosphoRibosylpyrophosphate Synthetase	+	1	1491,	Est2-WMC.igv.sorted.bed	chr15	213050	213249	199	100
chr15	219208	220471	YOL058W	ARG1	ARGinine requiring	+	1	1263,	Est2-WMC.igv.sorted.bed	chr15	219650	219849	199	100
chr15	234937	238183	YOL051W	GAL11	GALactose metabolism	+	1	3246,	Est2-WMC.igv.sorted.bed	chr15	236250	236449	199	100
chr15	270632	271370	YOL028C	YAP7	Yeast AP-1	-	1	738,	Est2-WMC.igv.sorted.bed	chr15	271150	271249	99	100
chr15	286171	287950	YOL020W	TAT2	Tryptophan Amino acid Transporter	+	1	1779,	Est2-WMC.igv.sorted.bed	chr15	286850	286949	99	100
chr15	288897	290553	YOL019W			+	1	1656,	Est2-WMC.igv.sorted.bed	chr15	290050	290149	99	100
chr15	316937	321548	YOL004W	SIN3	Switch INdependent	+	1	4611,	Est2-WMC.igv.sorted.bed	chr15	318650	319149	499	100
chr15	341277	342414	YOR008C	SLG1	Synthetic Lethal with Gap	-	1	1137,	Est2-WMC.igv.sorted.bed	chr15	341450	341949	499	100
chr15	344333	345797	YOR009W	TIR4	TIp1-Related	+	1	1464,	Est2-WMC.igv.sorted.bed	chr15	344650	344949	299	100
chr15	344333	345797	YOR009W	TIR4	TIp1-Related	+	1	1464,	Est2-WMC.igv.sorted.bed	chr15	344950	345349	399	100
chr15	344333	345797	YOR009W	TIR4	TIp1-Related	+	1	1464,	Est2-WMC.igv.sorted.bed	chr15	344950	345349	399	100
chr15	346193	346949	YOR010C	TIR2	TIp1-Related	-	1	756,	Est2-WMC.igv.sorted.bed	chr15	346650	346749	99	100
chr15	376010	377711	YOR023C	AHC1	Ada Histone acetyltransferase complex Component	-	1	1701,	Est2-WMC.igv.sorted.bed	chr15	377350	377549	199	100
chr15	381051	382821	YOR027W	STI1	STress Inducible	+	1	1770,	Est2-WMC.igv.sorted.bed	chr15	381850	382149	299	100
chr15	408423	409659	YOR042W	CUE5	Coupling of Ubiquitin conjugation to ER degradation	+	1	1236,	Est2-WMC.igv.sorted.bed	chr15	409250	409449	199	100
chr15	427833	429858	YOR054C	VHS3	Viable in a Hal3 Sit4 background	-	1	2025,	Est2-WMC.igv.sorted.bed	chr15	428050	428449	399	100
chr15	455907	457821	YOR070C	GYP1	Gtpase-activating protein for YPt1p	-	1	1914,	Est2-WMC.igv.sorted.bed	chr15	455950	456249	299	100
chr15	455907	457821	YOR070C	GYP1	Gtpase-activating protein for YPt1p	-	1	1914,	Est2-WMC.igv.sorted.bed	chr15	457350	457449	99	100
chr15	459480	461277	YOR071C	NRT1	Nicotinamide Riboside Transporter	-	1	1797,	Est2-WMC.igv.sorted.bed	chr15	460450	460649	199	100
chr15	479533	480421	YOR083W	WHI5	WHIskey	+	1	888,	Est2-WMC.igv.sorted.bed	chr15	479850	480149	299	100
chr15	480587	481751	YOR084W	LPX1	Lipase of PeroXisomes	+	1	1164,	Est2-WMC.igv.sorted.bed	chr15	480950	481049	99	100
chr15	480587	481751	YOR084W	LPX1	Lipase of PeroXisomes	+	1	1164,	Est2-WMC.igv.sorted.bed	chr15	480950	481049	99	100
chr15	482033	483086	YOR085W	OST3	OligoSaccharylTransferase	+	1	1053,	Est2-WMC.igv.sorted.bed	chr15	482750	482849	99	100
chr15	493264	494470	YOR091W	TMA46	Translation Machinery Associated	+	1	1206,	Est2-WMC.igv.sorted.bed	chr15	493750	494049	299	100
chr15	507947	511178	YOR098C	NUP1	NUclear Pore	-	1	3231,	Est2-WMC.igv.sorted.bed	chr15	509450	509649	199	100
chr15	539762	544145	YOR116C	RPO31	RNA POlymerase	-	1	4383,	Est2-WMC.igv.sorted.bed	chr15	542850	543449	599	100
chr15	586980	589281	YOR140W	SFL1	Suppressor gene for FLocculation	+	1	2301,	Est2-WMC.igv.sorted.bed	chr15	588750	589049	299	100
chr15	619839	624375	YOR153W	PDR5	Pleiotropic Drug Resistance	+	1	4536,	Est2-WMC.igv.sorted.bed	chr15	622950	623349	399	100
chr15	628359	630540	YOR156C	NFI1	Neck Filament Interacting	-	1	2181,	Est2-WMC.igv.sorted.bed	chr15	628550	628849	299	100
chr15	685766	689180	YOR188W	MSB1	Multicopy Suppression of a Budding defect	+	1	3414,	Est2-WMC.igv.sorted.bed	chr15	688850	688949	99	100
chr15	770799	772113	YOR230W	WTM1	WD repeat containing Transcriptional Modulator	+	1	1314,	Est2-WMC.igv.sorted.bed	chr15	771450	771549	99	100
chr15	786994	788641	YOR241W	MET7	METhionine requiring	+	1	1647,	Est2-WMC.igv.sorted.bed	chr15	787650	787949	299	100
chr15	805030	807022	YOR254C	SEC63	SECretory	-	1	1992,	Est2-WMC.igv.sorted.bed	chr15	805950	806049	99	100
chr15	828048	830571	YOR270C	VPH1	Vacuolar pH	-	1	2523,	Est2-WMC.igv.sorted.bed	chr15	829450	829549	99	100
chr15	831055	832039	YOR271C	FSF1	Fungal SideroFlexin 1	-	1	984,	Est2-WMC.igv.sorted.bed	chr15	831550	831749	199	100
chr15	832809	834192	YOR272W	YTM1		+	1	1383,	Est2-WMC.igv.sorted.bed	chr15	833850	834049	199	100
chr15	861171	865590	YOR291W	YPK9	Yeast PARK9	+	1	4419,	Est2-WMC.igv.sorted.bed	chr15	861450	861649	199	100
chr15	861171	865590	YOR291W	YPK9	Yeast PARK9	+	1	4419,	Est2-WMC.igv.sorted.bed	chr15	863050	863249	199	100
chr15	878428	880669	YOR299W	BUD7	BUD site selection	+	1	2241,	Est2-WMC.igv.sorted.bed	chr15	880050	880149	99	100
chr15	918598	921055	YOR322C	LDB19	Low Dye Binding	-	1	2457,	Est2-WMC.igv.sorted.bed	chr15	919750	919849	99	100
chr15	921527	922898	YOR323C	PRO2	PROline requiring	-	1	1371,	Est2-WMC.igv.sorted.bed	chr15	921750	921949	199	100
chr15	925713	930438	YOR326W	MYO2	MYOsin	+	1	4725,	Est2-WMC.igv.sorted.bed	chr15	925950	926049	99	100
chr15	939613	943456	YOR330C	MIP1	MItochondrial DNA Polymerase	-	1	3843,	Est2-WMC.igv.sorted.bed	chr15	942850	942949	99	100
chr15	1007214	1009110	YOR356W	CIR2	Changed Intracellular Redox state	+	1	1896,	Est2-WMC.igv.sorted.bed	chr15	1008350	1008549	199	100
chr15	1011182	1012754	YOR359W	VTS1	VTi1-2 Suppressor	+	1	1572,	Est2-WMC.igv.sorted.bed	chr15	1011350	1011749	399	100
chr15	1017873	1018740	YOR362C	PRE10	PRoteinase yscE	-	1	867,	Est2-WMC.igv.sorted.bed	chr15	1018050	1018349	299	100
chr15	1060434	1061049	YOR383C	FIT3	Facilitator of Iron Transport	-	1	615,	Est2-WMC.igv.sorted.bed	chr15	1060550	1060749	199	100
chr15	1069614	1070235	YOR387C			-	1	621,	Est2-WMC.igv.sorted.bed	chr15	1069750	1069949	199	100
chr16	47335	48802	YPL262W	FUM1	FUMarase	+	1	1467,	Est2-WMC.igv.sorted.bed	chr16	47600	48599	999	100
chr16	107274	108147	YPL232W	SSO1	Supressor of Sec One	+	1	873,	Est2-WMC.igv.sorted.bed	chr16	107700	107899	199	100
chr16	108651	114315	YPL231W	FAS2	Fatty Acid Synthetase	+	1	5664,	Est2-WMC.igv.sorted.bed	chr16	111700	113099	1399	100
chr16	115311	116487	YPL230W	USV1	Up in StarVation	+	1	1176,	Est2-WMC.igv.sorted.bed	chr16	115800	115999	199	100
chr16	121766	125357	YPL226W	NEW1	Nu+	+	1	3591,	Est2-WMC.igv.sorted.bed	chr16	124500	124999	499	100
chr16	133041	135423	YPL221W	FLC1	FLavin Carrier	+	1	2382,	Est2-WMC.igv.sorted.bed	chr16	133300	133899	599	100
chr16	203419	204940	YPL181W	CTI6	Cyc8-Tup1 Interacting protein	+	1	1521,	Est2-WMC.igv.sorted.bed	chr16	203700	203999	299	100
chr16	226167	227370	YPL171C	OYE3	Old Yellow Enzyme	-	1	1203,	Est2-WMC.igv.sorted.bed	chr16	226900	227199	299	100
chr16	266178	267534	YPL151C	PRP46	Pre-mRNA Processing	-	1	1356,	Est2-WMC.igv.sorted.bed	chr16	266400	266699	299	100
chr16	292815	296646	YPL137C	GIP3	Glc7 Interacting Protein	-	1	3831,	Est2-WMC.igv.sorted.bed	chr16	296200	296399	199	100
chr16	303119	304013	YPL131W	RPL5	Ribosomal Protein of the Large subunit	+	1	894,	Est2-WMC.igv.sorted.bed	chr16	303400	303599	199	100
chr16	310208	312899	YPL126W	NAN1	Net1 Associated Nuclear protein	+	1	2691,	Est2-WMC.igv.sorted.bed	chr16	311000	311399	399	100
chr16	350188	352270	YPL106C	SSE1	Stress Seventy subfamily E	-	1	2082,	Est2-WMC.igv.sorted.bed	chr16	350800	350899	99	100
chr16	370972	372916	YPL093W	NOG1	NucleOlar G-protein	+	1	1944,	Est2-WMC.igv.sorted.bed	chr16	371600	371999	399	100
chr16	370972	372916	YPL093W	NOG1	NucleOlar G-protein	+	1	1944,	Est2-WMC.igv.sorted.bed	chr16	372400	372799	399	100
chr16	379114	381145	YPL089C	RLM1	Resistance to Lethality of MKK1P386 overexpression	-	1	2031,	Est2-WMC.igv.sorted.bed	chr16	380300	380399	99	100
chr16	387061	393649	YPL085W	SEC16	SECretory	+	1	6588,	Est2-WMC.igv.sorted.bed	chr16	387200	387399	199	100
chr16	387061	393649	YPL085W	SEC16	SECretory	+	1	6588,	Est2-WMC.igv.sorted.bed	chr16	389200	389699	499	100
chr16	432582	434085	YPL061W	ALD6	ALdehyde Dehydrogenase	+	1	1503,	Est2-WMC.igv.sorted.bed	chr16	433800	433899	99	100
chr16	464395	465643	YPL048W	CAM1	Calcium And Membrane-binding protein	+	1	1248,	Est2-WMC.igv.sorted.bed	chr16	464600	464999	399	100
chr16	498091	499288	YPL028W	ERG10	ERGosterol biosynthesis	+	1	1197,	Est2-WMC.igv.sorted.bed	chr16	498400	498499	99	100
chr16	504334	506308	YPL023C	MET12	METhionine requiring	-	1	1974,	Est2-WMC.igv.sorted.bed	chr16	505000	505499	499	100
chr16	539379	541965	YPL008W	CHL1	CHromosome Loss	+	1	2586,	Est2-WMC.igv.sorted.bed	chr16	539400	539499	99	100
chr16	573012	575097	YPR008W	HAA1	Homolog of Ace1 Activator	+	1	2085,	Est2-WMC.igv.sorted.bed	chr16	574600	574699	99	100
chr16	610475	612719	YPR024W	YME1	Yeast Mitochondrial Escape	+	1	2244,	Est2-WMC.igv.sorted.bed	chr16	610900	611099	199	100
chr16	627874	631240	YPR030W	CSR2	Chs5 Spa2 Rescue	+	1	3366,	Est2-WMC.igv.sorted.bed	chr16	628200	628299	99	100
chr16	642202	643315	YPR035W	GLN1	GLutamiNe metabolism	+	1	1113,	Est2-WMC.igv.sorted.bed	chr16	642800	642899	99	100
chr16	643830	645267	YPR036W	VMA13	Vacuolar Membrane Atpase	+	1	1437,	Est2-WMC.igv.sorted.bed	chr16	644500	644999	499	100
chr16	646442	647033	YPR037C	ERV2	Essential for Respiration and Viability	-	1	591,	Est2-WMC.igv.sorted.bed	chr16	646700	646899	199	100
chr16	647299	648370	YPR040W	TIP41	Tap42 Interacting Protein	+	1	1071,	Est2-WMC.igv.sorted.bed	chr16	647500	647699	199	100
chr16	648698	649916	YPR041W	TIF5	Translation Initiation Factor	+	1	1218,	Est2-WMC.igv.sorted.bed	chr16	649400	649799	399	100
chr16	753296	754244	YPR114W			+	1	948,	Est2-WMC.igv.sorted.bed	chr16	753500	753699	199	100
chr16	810977	812447	YPR138C	MEP3		-	1	1470,	Est2-WMC.igv.sorted.bed	chr16	811000	811299	299	100
chr16	829911	830433	YPR149W	NCE102	NonClassical Export	+	1	522,	Est2-WMC.igv.sorted.bed	chr16	830000	830199	199	100
chr16	832054	833452	YPR152C	URN1	U2-U5-U6 snRNP	-	1	1398,	Est2-WMC.igv.sorted.bed	chr16	832200	832499	299	100
chr16	868638	869949	YPR163C	TIF3	Translation Initiation Factor	-	1	1311,	Est2-WMC.igv.sorted.bed	chr16	869300	869799	499	100
chr16	875361	875991	YPR165W	RHO1	Ras HOmolog	+	1	630,	Est2-WMC.igv.sorted.bed	chr16	875700	875899	199	100
chr16	892325	893723	YPR178W	PRP4	Pre-mRNA Processing	+	1	1398,	Est2-WMC.igv.sorted.bed	chr16	893300	893399	99	100
chr16	897354	899661	YPR181C	SEC23	SECretory	-	1	2307,	Est2-WMC.igv.sorted.bed	chr16	898500	898799	299	100
chr16	897354	899661	YPR181C	SEC23	SECretory	-	1	2307,	Est2-WMC.igv.sorted.bed	chr16	899000	899599	599	100
chr8	484023	484596	YHR189W	PTH1	Peptidyl-Trna Hydrolase	+	1	573,	Est2-WMC.igv.sorted.bed	chr8	484200	484599	396	99.2481
chr3	210709	211537	YCR047C	BUD23	BUD site selection	-	1	828,	Est2-WMC.igv.sorted.bed	chr3	210700	211399	690	98.7124
chr7	913504	914740	YGR210C			-	1	1236,	Est2-WMC.igv.sorted.bed	chr7	914250	914749	490	98.1964
chr15	675938	677840	YOR181W	LAS17		+	1	1902,	Est2-WMC.igv.sorted.bed	chr15	677050	677849	790	98.8736
chr4	806613	807741	YDR171W	HSP42	Heat Shock Protein	+	1	1128,	Est2-WMC.igv.sorted.bed	chr4	806600	807099	486	97.3948
chr7	529264	530920	YGR023W	MTL1	Mid-Two Like	+	1	1656,	Est2-WMC.igv.sorted.bed	chr7	529250	529849	585	97.6628
chr7	846934	848425	YGR175C	ERG1	ERGosterol biosynthesis	-	1	1491,	Est2-WMC.igv.sorted.bed	chr7	847550	848449	875	97.3304
chr9	128150	129578	YIL123W	SIM1	Start Independent of Mitosis	+	1	1428,	Est2-WMC.igv.sorted.bed	chr9	128800	129599	778	97.3717
chr10	469923	470658	YJR024C	MDE1	Methylthioribulose-1-phosphate DEhydratase	-	1	735,	Est2-WMC.igv.sorted.bed	chr10	469900	470499	576	96.1603
chr11	615363	617169	YKR093W	PTR2	Peptide TRansport	+	1	1806,	Est2-WMC.igv.sorted.bed	chr11	615350	615649	286	95.6522
chr15	559029	559731	YOR125C	CAT5	CATabolite repression	-	1	702,	Est2-WMC.igv.sorted.bed	chr15	559350	559749	381	95.4887
chr3	62775	63282	YCL033C	MXR2	peptide Methionine sulfoXide Reductase	-	1	507,	Est2-WMC.igv.sorted.bed	chr3	63000	63299	282	94.3144
chr4	1517115	1517655	YDR540C	IRC4	Increased Recombination Centers	-	1	540,	Est2-WMC.igv.sorted.bed	chr4	1517100	1517399	284	94.9833
chr12	232390	234082	YLR044C	PDC1	Pyruvate DeCarboxylase	-	1	1692,	Est2-WMC.igv.sorted.bed	chr12	233800	234099	282	94.3144
chr13	337311	337602	YMR030W-A			+	1	291,	Est2-WMC.igv.sorted.bed	chr13	337300	337499	188	94.4724
chr12	21137	21839	YLL060C	GTT2	GlutaThione Transferase	-	1	702,	Est2-WMC.igv.sorted.bed	chr12	21100	21599	462	92.5852
chr13	272192	272663	YMR002W	MIX17	Mitochondrial Intermembrane space CX(n)C motif protein	+	1	471,	Est2-WMC.igv.sorted.bed	chr13	272200	272699	463	92.7856
chr14	714044	715385	YNR050C	LYS9	LYSine requiring	-	1	1341,	Est2-WMC.igv.sorted.bed	chr14	715200	715399	185	92.9648
chr2	71859	72966	YBL081W			+	1	1107,	Est2-WMC.igv.sorted.bed	chr2	72600	72999	366	91.7293
chr5	78052	79456	YEL040W	UTR2	Unidentified TRanscript	+	1	1404,	Est2-WMC.igv.sorted.bed	chr5	79000	79499	456	91.3828
chr11	527451	530121	YKR050W	TRK2	TRansport of potassium (K)	+	1	2670,	Est2-WMC.igv.sorted.bed	chr11	527350	528549	1098	91.5763
chr13	667535	668204	YMR202W	ERG2	ERGosterol biosynthesis	+	1	669,	Est2-WMC.igv.sorted.bed	chr13	667500	667899	364	91.2281
chr15	954336	956616	YOR337W	TEA1	Ty Enhancer Activator	+	1	2280,	Est2-WMC.igv.sorted.bed	chr15	956250	956649	366	91.7293
chr16	900748	901552	YPR183W	DPM1	Dolichol Phosphate Mannose synthase	+	1	804,	Est2-WMC.igv.sorted.bed	chr16	900700	901299	551	91.9866
chr3	186480	190161	YCR033W	SNT1	SaNT domains	+	1	3681,	Est2-WMC.igv.sorted.bed	chr3	189800	190199	361	90.4762
chr5	86936	89852	YEL032W	MCM3	MiniChromosome Maintenance	+	1	2916,	Est2-WMC.igv.sorted.bed	chr5	86900	87299	363	90.9774
chr8	175538	176810	YHR033W			+	1	1272,	Est2-WMC.igv.sorted.bed	chr8	175500	175899	361	90.4762
chr10	289570	290470	YJL079C	PRY1	Pathogen Related in Yeast	-	1	900,	Est2-WMC.igv.sorted.bed	chr10	289500	290099	529	88.3139
chr12	875734	877177	YLR378C	SEC61	SECretory	-	1	1443,	Est2-WMC.igv.sorted.bed	chr12	875700	875999	265	88.6288
chr13	92234	94241	YML088W	UFO1	UV-F-box-HO	+	1	2007,	Est2-WMC.igv.sorted.bed	chr13	92200	92499	265	88.6288
chr4	458537	461243	YDR006C	SOK1	Suppressor Of Kinase	-	1	2706,	Est2-WMC.igv.sorted.bed	chr4	458500	458799	262	87.6254
chr13	879062	880232	YMR305C	SCW10	Soluble Cell Wall protein	-	1	1170,	Est2-WMC.igv.sorted.bed	chr13	879000	879499	437	87.5752
chr2	386242	389173	YBR074W	PFF1	Protease in FXNA-related Family	+	1	2931,	Est2-WMC.igv.sorted.bed	chr2	389000	389199	173	86.9347
chr4	1410440	1411115	YDR476C			-	1	675,	Est2-WMC.igv.sorted.bed	chr4	1410400	1410699	259	86.6221
chr10	570660	571818	YJR072C	NPA3	Nucleolar Preribosomal Associated	-	1	1158,	Est2-WMC.igv.sorted.bed	chr10	571300	571899	518	86.4775
chr12	440467	441289	YLR150W	STM1	Suppressor of ToM1	+	1	822,	Est2-WMC.igv.sorted.bed	chr12	440600	441399	689	86.2328
chr15	268186	269641	YOL030W	GAS5	Glycophospholipid-Anchored Surface protein	+	1	1455,	Est2-WMC.igv.sorted.bed	chr15	268950	269749	691	86.4831
chr1	128253	129021	YAL014C	SYN8	SYNtaxin	-	1	768,	Est2-WMC.igv.sorted.bed	chr1	128850	129049	171	85.9296
chr10	330126	332769	YJL056C	ZAP1	Zinc-responsive Activator Protein	-	1	2643,	Est2-WMC.igv.sorted.bed	chr10	332600	332799	169	84.9246
chr15	534074	536819	YOR113W	AZF1	Asparagine-rich Zinc-Finger	+	1	2745,	Est2-WMC.igv.sorted.bed	chr15	536650	536849	169	84.9246
chr11	389877	391917	YKL025C	PAN3	Poly(A) Nuclease	-	1	2040,	Est2-WMC.igv.sorted.bed	chr11	391750	391949	167	83.9196
chr12	95564	97484	YLL024C	SSA2	Stress-Seventy subfamily A	-	1	1920,	Est2-WMC.igv.sorted.bed	chr12	95500	95899	335	83.9599
chr16	75698	76239	YPL249C-A	RPL36B	Ribosomal Protein of the Large subunit	-	2	287,16,	Est2-WMC.igv.sorted.bed	chr16	75600	76199	501	83.6394
chr4	1236545	1237992	YDR381W	YRA1	Yeast RNA Annealing protein	+	2	285,396,	Est2-WMC.igv.sorted.bed	chr4	1237500	1238099	492	82.1369
chr12	919534	921595	YLR399C	BDF1	BromoDomain Factor	-	1	2061,	Est2-WMC.igv.sorted.bed	chr12	919500	919699	165	82.9146
chr16	886517	887831	YPR173C	VPS4	Vacuolar Protein Sorting	-	1	1314,	Est2-WMC.igv.sorted.bed	chr16	886500	886599	82	82.8283
chr10	92049	94527	YJL176C	SWI3	SWItching deficient	-	1	2478,	Est2-WMC.igv.sorted.bed	chr10	94200	94599	327	81.9549
chr12	388744	390271	YLR121C	YPS3	YaPSin	-	1	1527,	Est2-WMC.igv.sorted.bed	chr12	389700	390399	571	81.6881
chr13	815650	818581	YMR275C	BUL1	Binds Ubiquitin Ligase	-	1	2931,	Est2-WMC.igv.sorted.bed	chr13	818500	818599	81	81.8182
chr14	693015	694044	YNR035C	ARC35	ARp2/3 Complex subunit	-	1	1029,	Est2-WMC.igv.sorted.bed	chr14	693800	694099	244	81.6054
chr8	499074	499881	YHR200W	RPN10	Regulatory Particle Non-ATPase	+	1	807,	Est2-WMC.igv.sorted.bed	chr8	499400	499999	481	80.3005
chr3	214062	214731	YCR051W			+	1	669,	Est2-WMC.igv.sorted.bed	chr3	214000	214299	237	79.2642
chr4	768504	768993	YDR155C	CPR1	Cyclosporin A-sensitive Proline Rotamase	-	1	489,	Est2-WMC.igv.sorted.bed	chr4	768400	768899	395	79.1583
chr7	307437	308568	YGL105W	ARC1	Aminoacyl-tRNA synthetase Cofactor	+	1	1131,	Est2-WMC.igv.sorted.bed	chr7	308250	308649	318	79.6992
chr7	431550	433065	YGL035C	MIG1	Multicopy Inhibitor of GAL gene expression	-	1	1515,	Est2-WMC.igv.sorted.bed	chr7	431450	431949	399	79.9599
chr8	484840	486175	YHR190W	ERG9	ERGosterol biosynthesis	+	1	1335,	Est2-WMC.igv.sorted.bed	chr8	484800	484999	159	79.8995
chr11	31960	34108	YKL213C	DOA1	Degradation Of Alpha	-	1	2148,	Est2-WMC.igv.sorted.bed	chr11	33950	34149	158	79.397
chr13	85986	86739	YML092C	PRE8	PRoteinase yscE	-	1	753,	Est2-WMC.igv.sorted.bed	chr13	86500	86799	239	79.9331
chr9	389568	393672	YIR019C	FLO11	FLOcculation	-	1	4104,	Est2-WMC.igv.sorted.bed	chr9	389400	390199	631	78.9737
chr11	326048	327128	YKL060C	FBA1	Fructose-1	-	1	1080,	Est2-WMC.igv.sorted.bed	chr11	327050	327149	78	78.7879
chr16	553621	554323	YPL002C	SNF8	Sucrose NonFermenting	-	1	702,	Est2-WMC.igv.sorted.bed	chr16	553600	553699	78	78.7879
chr8	509358	511833	YHR205W	SCH9		+	1	2475,	Est2-WMC.igv.sorted.bed	chr8	511600	511899	233	77.9264
chr13	241988	243029	YML015C	TAF11	TATA binding protein-Associated Factor	-	1	1041,	Est2-WMC.igv.sorted.bed	chr13	241900	242299	311	77.9449
chr1	75044	76154	YAL036C	RBG1	RiBosome interacting Gtpase	-	1	1110,	Est2-WMC.igv.sorted.bed	chr1	75850	76249	304	76.1905
chr7	940868	942215	YGR223C	HSV2	Homologous with SVP1	-	1	1347,	Est2-WMC.igv.sorted.bed	chr7	940750	941249	381	76.3527
chr9	23118	26106	YIL169C	CSS1	Condition Specific Secretion	-	1	2988,	Est2-WMC.igv.sorted.bed	chr9	25800	26199	306	76.6917
chr14	33292	34234	YNL322C	KRE1	Killer toxin REsistant	-	1	942,	Est2-WMC.igv.sorted.bed	chr14	33700	34399	534	76.3948
chr1	12046	12427	YAL064W-B			+	1	381,	Est2-WMC.igv.sorted.bed	chr1	12050	12549	377	75.5511
chr16	278393	279698	YPL145C	KES1	KrE11-1 Suppressor	-	1	1305,	Est2-WMC.igv.sorted.bed	chr16	278200	278999	606	75.8448
chr6	224313	224757	YFR033C	QCR6	ubiQuinol-cytochrome C oxidoReductase	-	1	444,	Est2-WMC.igv.sorted.bed	chr6	224300	224899	444	74.1235
chr10	466925	467975	YJR019C	TES1	ThioESterase	-	1	1050,	Est2-WMC.igv.sorted.bed	chr10	466900	466999	74	74.7475
chr12	201976	202591	YLR029C	RPL15A	Ribosomal Protein of the Large subunit	-	1	615,	Est2-WMC.igv.sorted.bed	chr12	201900	202199	223	74.5819
chr16	900187	900448	YPR182W	SMX3		+	1	261,	Est2-WMC.igv.sorted.bed	chr16	900300	900499	148	74.3719
chr1	57030	57387	YAL046C	BOL3	BolA-like protein	-	1	357,	Est2-WMC.igv.sorted.bed	chr1	56950	57249	219	73.2441
chr2	69744	71121	YBL082C	ALG3	Asparagine Linked Glycosylation	-	1	1377,	Est2-WMC.igv.sorted.bed	chr2	70900	71199	221	73.913
chr10	638353	638746	YJR114W			+	1	393,	Est2-WMC.igv.sorted.bed	chr10	638300	638499	146	73.3668
chr3	50837	52340	YCL040W	GLK1	GLucoKinase	+	1	1503,	Est2-WMC.igv.sorted.bed	chr3	50700	51199	362	72.5451
chr4	631274	636113	YDR093W	DNF2	Drs2 Neo1 Family	+	1	4839,	Est2-WMC.igv.sorted.bed	chr4	635900	636199	213	71.2375
chr4	1293356	1294382	YDR411C	DFM1	Der1-like Family Member	-	1	1026,	Est2-WMC.igv.sorted.bed	chr4	1293300	1293499	143	71.8593
chr13	222986	223828	YML026C	RPS18B	Ribosomal Protein of the Small subunit	-	2	394,47,	Est2-WMC.igv.sorted.bed	chr13	222900	223199	213	71.2375
chr12	417006	418110	YLR137W	RKM5	Ribosomal lysine (K) Methyltransferase 5	+	1	1104,	Est2-WMC.igv.sorted.bed	chr12	417900	418199	210	70.2341
chr7	97339	98587	YGL208W	SIP2	SNF1-Interacting Protein	+	1	1248,	Est2-WMC.igv.sorted.bed	chr7	97150	97749	410	68.4474
chr11	334052	334556	YKL056C	TMA19	Translation Machinery Associated	-	1	504,	Est2-WMC.igv.sorted.bed	chr11	334350	334649	206	68.8963
chr6	210924	212961	YFR029W	PTR3	Peptide TRansport	+	1	2037,	Est2-WMC.igv.sorted.bed	chr6	210700	211399	475	67.9542
chr15	761613	762084	YOR226C	ISU2	IscU homolog	-	1	471,	Est2-WMC.igv.sorted.bed	chr15	761950	762149	134	67.3367
chr8	482000	483833	YHR188C	GPI16	GlycosylPhosphatidylInositol anchor biosynthesis	-	1	1833,	Est2-WMC.igv.sorted.bed	chr8	483500	483999	333	66.7335
chr10	554888	555266	YJR063W	RPA12	RNA Polymerase A	+	1	378,	Est2-WMC.igv.sorted.bed	chr10	555200	555299	66	66.6667
chr11	521651	522983	YKR044W	UIP5	Ulp1 Interacting Protein	+	1	1332,	Est2-WMC.igv.sorted.bed	chr11	522850	523049	133	66.8342
chr13	701788	703366	YMR217W	GUA1	GUanine Auxotroph	+	1	1578,	Est2-WMC.igv.sorted.bed	chr13	703100	703499	266	66.6667
chr14	87894	88734	YNL289W	PCL1	Pho85 CycLin	+	1	840,	Est2-WMC.igv.sorted.bed	chr14	88400	88899	334	66.9339
chr2	700444	701797	YBR240C	THI2	THIamine metabolism	-	1	1353,	Est2-WMC.igv.sorted.bed	chr2	701600	701899	197	65.8863
chr8	340110	341361	YHR115C	DMA1	Defective in Mitotic Arrest	-	1	1251,	Est2-WMC.igv.sorted.bed	chr8	341100	341499	261	65.4135
chr1	118565	119543	YAL018C	LDS1	Lipid Droplets in Sporulation	-	1	978,	Est2-WMC.igv.sorted.bed	chr1	119350	119649	193	64.5485
chr2	163002	163959	YBL030C	PET9	PETite	-	1	957,	Est2-WMC.igv.sorted.bed	chr2	163700	164099	259	64.9123
chr10	622242	622707	YJR104C	SOD1	SuperOxide Dismutase	-	1	465,	Est2-WMC.igv.sorted.bed	chr10	622100	622499	257	64.411
chr4	694692	697887	YDR122W	KIN1	KINase	+	1	3195,	Est2-WMC.igv.sorted.bed	chr4	697700	697999	187	62.5418
chr7	364335	365997	YGL076C	RPL7A	Ribosomal Protein of the Large subunit	-	3	630,94,11,	Est2-WMC.igv.sorted.bed	chr7	364150	364649	314	62.9259
chr11	107316	108600	YKL181W	PRS1	PhosphoRibosylpyrophosphate Synthetase	+	1	1284,	Est2-WMC.igv.sorted.bed	chr11	108350	108749	250	62.6566
chr16	82624	84196	YPL247C			-	1	1572,	Est2-WMC.igv.sorted.bed	chr16	83700	84499	496	62.0776
chr5	333171	335184	YER088C	DOT6	Disruptor Of Telomeric silencing	-	1	2013,	Est2-WMC.igv.sorted.bed	chr5	334400	335699	784	60.3541
chr1	68717	69527	YAL039C	CYC3	CYtochrome C	-	1	810,	Est2-WMC.igv.sorted.bed	chr1	69350	69649	177	59.1973
chr3	11502	12285	YCL068C			-	1	783,	Est2-WMC.igv.sorted.bed	chr3	11300	11799	297	59.519
chr14	694357	694819	YNR036C	MRPS12	Mitochondrial Ribosomal Protein	-	1	462,	Est2-WMC.igv.sorted.bed	chr14	694700	694899	119	59.799
chr10	146798	147275	YJL143W	TIM17	Translocase of the Inner Mitochondrial membrane	+	1	477,	Est2-WMC.igv.sorted.bed	chr10	147100	147399	175	58.5284
chr4	865003	867514	YDR207C	UME6	Unscheduled Meiotic gene Expression	-	1	2511,	Est2-WMC.igv.sorted.bed	chr4	867400	867599	114	57.2864
chr5	266510	268112	YER056C	FCY2	FluoroCYtosine resistance	-	1	1602,	Est2-WMC.igv.sorted.bed	chr5	268000	268199	112	56.2814
chr12	368781	369312	YLR109W	AHP1	Alkyl HydroPeroxide reductase	+	1	531,	Est2-WMC.igv.sorted.bed	chr12	369200	369399	112	56.2814
chr16	665687	665969	YPR052C	NHP6A	Non-Histone Protein	-	1	282,	Est2-WMC.igv.sorted.bed	chr16	665600	665799	112	56.2814
chr2	300124	301213	YBR031W	RPL4A	Ribosomal Protein of the Large subunit	+	1	1089,	Est2-WMC.igv.sorted.bed	chr2	299900	300399	275	55.1102
chr4	1239479	1239812	YDR382W	RPP2B	Ribosomal Protein P2 Beta	+	1	333,	Est2-WMC.igv.sorted.bed	chr4	1239400	1239999	333	55.5927
chr14	345665	346055	YNL153C	GIM3	Gene Involved in Microtubule biogenesis	-	1	390,	Est2-WMC.igv.sorted.bed	chr14	346000	346099	55	55.5556
chr15	254294	254615	YOL039W	RPP2A	Ribosomal Protein P2 Alpha	+	1	321,	Est2-WMC.igv.sorted.bed	chr15	254450	254749	165	55.1839
chr5	425183	430445	YER132C	PMD1	Paralog of MDS3	-	1	5262,	Est2-WMC.igv.sorted.bed	chr5	425000	425399	216	54.1353
chr8	497485	498418	YHR199C	AIM46	Altered Inheritance rate of Mitochondria	-	1	933,	Est2-WMC.igv.sorted.bed	chr8	498200	498599	218	54.6366
chr13	95790	97371	YML086C	ALO1	D-Arabinono-1	-	1	1581,	Est2-WMC.igv.sorted.bed	chr13	95700	95899	109	54.7739
chr16	229037	230837	YPL169C	MEX67	Messenger RNA EXport factor of 67 kDa	-	1	1800,	Est2-WMC.igv.sorted.bed	chr16	228900	229199	162	54.1806
chr2	734786	735485	YBR261C	TAE1	Translation Associated Element	-	1	699,	Est2-WMC.igv.sorted.bed	chr2	734900	735999	585	53.2302
chr12	1030827	1032006	YLR449W	FPR4	FKBP Proline Rotamase (isomerase)	+	1	1179,	Est2-WMC.igv.sorted.bed	chr12	1031900	1032099	106	53.2663
chr15	797675	798308	YOR247W	SRL1	Suppressor of Rad53 null Lethality	+	1	633,	Est2-WMC.igv.sorted.bed	chr15	798150	798449	158	52.8428
chr2	235355	235754	YBL003C	HTA2	Histone h Two A	-	1	399,	Est2-WMC.igv.sorted.bed	chr2	235600	235899	154	51.505
chr14	65742	66051	YNL300W	TOS6		+	1	309,	Est2-WMC.igv.sorted.bed	chr14	65900	66199	151	50.5017
chr12	263194	263949	YLR061W	RPL22A	Ribosomal Protein of the Large subunit	+	2	12,354,	Est2-WMC.igv.sorted.bed	chr12	263700	264199	249	49.8998
chr16	387061	393649	YPL085W	SEC16	SECretory	+	1	6588,	Est2-WMC.igv.sorted.bed	chr16	393400	393899	249	49.8998
chr3	50583	50943	YCL042W			+	1	360,	Est2-WMC.igv.sorted.bed	chr3	50700	51199	243	48.6974
chr12	954253	954592	YLR415C			-	1	339,	Est2-WMC.igv.sorted.bed	chr12	954500	954699	92	46.2312
chr15	1017873	1018740	YOR362C	PRE10	PRoteinase yscE	-	1	867,	Est2-WMC.igv.sorted.bed	chr15	1018650	1018849	90	45.2261
chr6	76828	77986	YFL030W	AGX1	Alanine:Glyoxylate aminotrans(X)ferase	+	1	1158,	Est2-WMC.igv.sorted.bed	chr6	76600	76999	171	42.8571
chr12	769317	771684	YLR319C	BUD6	BUD site selection	-	1	2367,	Est2-WMC.igv.sorted.bed	chr12	771600	771799	84	42.2111
chr9	80509	83041	YIL143C	SSL2	Suppressor of Stem-Loop mutation	-	1	2532,	Est2-WMC.igv.sorted.bed	chr9	83000	83099	41	41.4141
chr8	189121	189855	YHR041C	SRB2	Suppressor of RNA polymerase B	-	2	619,14,	Est2-WMC.igv.sorted.bed	chr8	189000	189199	78	39.196
chr14	707784	708192	YNR046W	TRM112	TRna Methyltransferase	+	1	408,	Est2-WMC.igv.sorted.bed	chr14	707600	707899	115	38.4615
chr12	1012495	1013770	YLR438W	CAR2	Catabolism of ARginine	+	1	1275,	Est2-WMC.igv.sorted.bed	chr12	1013700	1013899	70	35.1759
chr1	113615	114617	YAL020C	ATS1	Alpha Tubulin Suppressor	-	1	1002,	Est2-WMC.igv.sorted.bed	chr1	113550	113649	34	34.3434
chr13	624530	625166	YMR182C	RGM1		-	1	636,	Est2-WMC.igv.sorted.bed	chr13	624400	624599	69	34.6734
chr2	270205	270592	YBR016W			+	1	387,	Est2-WMC.igv.sorted.bed	chr2	269800	270399	194	32.3873
chr4	1344504	1345050	YDR441C	APT2	Adenine PhosphoribosylTransferase	-	1	546,	Est2-WMC.igv.sorted.bed	chr4	1344300	1344599	95	31.7726
chr1	114920	118316	YAL019W	FUN30	Function Unknown Now	+	1	3396,	Est2-WMC.igv.sorted.bed	chr1	114850	114949	29	29.2929
chr2	735674	735995	YBR262C	MIC12	MItochondrial contact site and Cristae organizing system	-	1	321,	Est2-WMC.igv.sorted.bed	chr2	734900	735999	321	29.2084
chr8	470955	472425	YHR183W	GND1	6-phosphoGlucoNateDehydrogenase	+	1	1470,	Est2-WMC.igv.sorted.bed	chr8	472400	472499	25	25.2525
chr8	75407	75773	YHL015W	RPS20	Ribosomal Protein of the Small subunit	+	1	366,	Est2-WMC.igv.sorted.bed	chr8	75700	75999	73	24.4147
chr9	383552	384116	YIR017C	MET28	METhionine	-	1	564,	Est2-WMC.igv.sorted.bed	chr9	383400	383599	47	23.6181
chr16	752252	752915	YPR113W	PIS1	Phosphatidyl Inositol Synthase	+	1	663,	Est2-WMC.igv.sorted.bed	chr16	752900	752999	15	15.1515
chr4	458537	461243	YDR006C	SOK1	Suppressor Of Kinase	-	1	2706,	Est2-WMC.igv.sorted.bed	chr4	461200	461499	43	14.3813
chr14	346309	347539	YNL152W	INN1	required for INgressioN	+	1	1230,	Est2-WMC.igv.sorted.bed	chr14	347500	347799	39	13.0435
chr3	214985	216437	YCR052W	RSC6	Remodel the Structure of Chromatin	+	1	1452,	Est2-WMC.igv.sorted.bed	chr3	216400	216699	37	12.3746
chr14	347762	348518	YNL151C	RPC31	RNA Polymerase C	-	1	756,	Est2-WMC.igv.sorted.bed	chr14	347500	347799	37	12.3746
chr1	110847	113361	YAL021C	CCR4	Carbon Catabolite Repression	-	1	2514,	Est2-WMC.igv.sorted.bed	chr1	113350	113449	11	11.1111
chr9	382624	383422	YIR016W			+	1	798,	Est2-WMC.igv.sorted.bed	chr9	383400	383599	22	11.0553
chr7	939922	940804	YGR222W	PET54	PETite colonies	+	1	882,	Est2-WMC.igv.sorted.bed	chr7	940750	941249	54	10.8216
chr10	620447	622142	YJR103W	URA8	URAcil requiring	+	1	1695,	Est2-WMC.igv.sorted.bed	chr10	622100	622499	42	10.5263
chr14	412767	413196	YNL113W	RPC19	RNA Polymerase C	+	1	429,	Est2-WMC.igv.sorted.bed	chr14	412500	412799	32	10.7023
chr8	499945	501139	YHR201C	PPX1		-	1	1194,	Est2-WMC.igv.sorted.bed	chr8	499400	499999	54	9.01503
chr4	1239947	1240664	YDR383C	NKP1	Non-essential Kinetochore Protein	-	1	717,	Est2-WMC.igv.sorted.bed	chr4	1239400	1239999	52	8.68114
chr6	223245	223425	YFR032C-A	RPL29	Ribosomal Protein of the Large subunit	-	1	180,	Est2-WMC.igv.sorted.bed	chr6	223400	223699	25	8.3612
chr12	264157	265255	YLR063W	BMT6	Base Methyltransferase of Twenty five S rRNA 6	+	1	1098,	Est2-WMC.igv.sorted.bed	chr12	263700	264199	42	8.41683
chr8	187914	189015	YHR040W	BCD1	Box C/D snoRNA accumulation	+	1	1101,	Est2-WMC.igv.sorted.bed	chr8	189000	189199	15	7.53769
chr3	216688	218233	YCR053W	THR4	THReonine requiring	+	1	1545,	Est2-WMC.igv.sorted.bed	chr3	216400	216699	11	3.67893
chr13	335296	337306	YMR032W	HOF1	Homolog Of cdc Fifteen	+	1	2010,	Est2-WMC.igv.sorted.bed	chr13	337300	337499	6	3.01508
chr2	298250	299909	YBR030W	RKM3	Ribosomal lysine (K) Methyltransferase	+	1	1659,	Est2-WMC.igv.sorted.bed	chr2	299900	300399	9	1.80361
chr14	706135	707605	YNR045W	PET494	PETite colonies	+	1	1470,	Est2-WMC.igv.sorted.bed	chr14	707600	707899	5	1.67224
chr6	223697	223961	YFR032C-B	MIN10	mitochondrial MINi protein of 10 kDa	-	1	264,	Est2-WMC.igv.sorted.bed	chr6	223400	223699	2	0.668896

## Sheet: Telomere homeostasis genes
Genes involved in Telomere homeostasis
ADO1
APE3
ARC35
BMH1
BUD23
CBF5
CDC13
CDC19
CDH1
CSR2
CST6
CYC8
CYR1
DEP1
EBS1
ERG2
FCP1
GAL11
INO80
KAE1
KRS1
LDB19
MCM3
MDN1
MET7
NCP1
NFI1
NPP1
PRP4
PRS5
PUB1
PXR1
RAP1
REB1
RNH201
RPN6
RSC8
RTF1
SAH1
SAM35
SAN1
SEC63
SIN3
SLA2
SNF8
SOH1
SRB2
SSE1
SSN2
STP22
TAT2
TRM5
TSR1
TUB2
VAM7
YDJ1
