# Supplementary material for: Telomerase subunit Est2 marks internal sites that are prone to accumulate DNA damage
Source: BMC Biol. 2021 Nov 20;19:247. doi: 10.1186/s12915-021-01167-1 (PMC8605574; doi:10.1186/s12915-021-01167-1)
Supplement: Supplementary file 8 — Additional file 8: Supplementary Table 3. List of bacterial strains used in this study. [file 12915_2021_1167_MOESM8_ESM.xlsx]

## Sheet: Sheet1
Bacterial stock	Plasmid	Bacterial strain	Antibiotic resistanceresistant	Purpose
DH5α	F- f80dlacZDM15 endA1 recA1 hsdR17(rk-,mk+) supE44 thi-1 gyrA96(Nalr) relA1 D(lacZYA-argF)U169 l-
PML10	PML10	DH5α	Ampicillin	Myc13-KAN
PML11	PML11	DH5α	Ampicillin	MYC-13-TRP
PML12	PML12	DH5α	Ampicillin	Myc-13-HIS
pFA6-KanMX	pFA6-KanMX6	DH5α	Ampicillin	for amplification of KanMX to delete genes
pRS305	pRS305	DH5α	Ampicillin	LEU2	for deletion purposes
pRS306	pRS306	DH5α	Ampicillin	URA3	for deletion purposes
pFA6a-NATMX	pFA6a	DH5α	Ampicillin
NTBS#5-HO plasmid	pRS415	DH5α	Ampicillin	for integration into Gal-HO strain
NTBS#4-HO plasmid	pRS415	DH5α	Ampicillin	for integration into Gal-HO strain
NTBS#1-HO plasmid	pRS415	DH5α	Ampicillin	for integration into Gal-HO strain
NTBS#2-HO plasmid	pRS415	DH5α	Ampicillin	for integration into Gal-HO strain
NTBS#3-HO plasmid	pRS415	DH5α	Ampicillin	for integration into Gal-HO strain
NTBS#6-HO plasmid	pRS415	DH5α	Ampicillin	for integration into Gal-HO strain
NTBS#7-HO plasmid	pRS415	DH5α	Ampicillin	for integration into Gal-HO strain
NTBS#8-HO plasmid	pRS415	DH5α	Ampicillin	for integration into Gal-HO strain
NTBS#9-HO plasmid	pRS415	DH5α	Ampicillin	for integration into Gal-HO strain
RNAseH1 control plasmid	pRS425-Gal (pBL211)::LEU	DH5α	Ampicillin	Control plasmid for RNAse H1 overexpression experiments
RNAseH1 overexpression plasmid	RNH1 proteinA HA 6HIS (pBL291)::URA	DH5α	Ampicillin	RNAse H1 overexpression plasmid with URA marker for selection
