# Supplementary material for: Telomerase subunit Est2 marks internal sites that are prone to accumulate DNA damage
Source: BMC Biol. 2021 Nov 20;19:247. doi: 10.1186/s12915-021-01167-1 (PMC8605574; doi:10.1186/s12915-021-01167-1)
Supplement: Supplementary file 10 — Additional file 10: Supplementary Table 5. List of primers used in this study. [file 12915_2021_1167_MOESM10_ESM.xlsx]

## Sheet: Sheet1
Name	Sequence	Purpose
NTBS#1-FP	CTCACTTCGTTTCCGCTGTC	qPCR for Est2-NTBS binding
NTBS#1-RP	CAGCAGCGTACTTTTCTGGG	qPCR for NTBS
NTBS#2-FP	TCACATCTTCCTCCGCTGTT	qPCR for NTBS
NTBS#2-RP	TCTGGGCAGTGGAAGAAGAG	qPCR for NTBS
NTBS#3-FP	GGTCCCTAGTTGTGGCTGAA	qPCR for NTBS
NTBS#3-RP	ACAACAGCAACCAGACATCG	qPCR for NTBS
NTBS#4-FP	GATGTTGGACAGCTTGGACG	qPCR for NTBS
NTBS#4-RP	CAAGGACAACTCAGCGATGG	qPCR for NTBS
NTBS#5-FP	CCGTGGACCAGGTACCTAAA	qPCR for NTBS
NTBS#5-RP	GGAGAAATTATCTGCTCCTATTTTT	qPCR for NTBS
NTBS#6-FP	CCCTCTGACATGGCAAATTC	qPCR for NTBS
NTBS#6-RP	CATGCTTGAATGGTCAATGG	qPCR for NTBS
NTBS#7-FP	CAATCCGGGTAATGGTAAACGT	qPCR for NTBS
NTBS#7-RP	TGTCTTCAGTCATTTGCCTGG	qPCR for NTBS
NTBS#8-FP	AAAAGCCAATTGTCTGCGGT	qPCR for NTBS
NTBS#8-RP	GGGGTACTTCTGTTAGCGTTG	qPCR for NTBS
NTBS#9-FP	AGGCTTCGCATTCGAGTTTA	qPCR for NTBS
NTBS#9-RP	GTTCAACTTCCGCTTCTTGG	qPCR for NTBS
ARO1-FP	TGCTGCAGTCACAATTCCTC	qPCR control primers
ARO1-RP	GGCTCTAGAAGTGCCACCTG	qPCR control primers
TELO-6L-FP	CAACTTGCGTGAATCGAAGA	qPCR control primers
TELO-6L-RP	CTGTCGATGATGCCTGCTAA	qPCR control primers
ChIP-HO-SBR27-FP	TACGCTGGTTTGCATAAAGG	qPCR for enrichment of protein at HO region
ChIP-HO-SBR27-RP	GGTTTCTTGTCTGGTTTCTC	qPCR for enrichment of protein at HO region
non y-H2AX-FP	CGAAGTATACCGTGCGTC	qPCR for non γ-H2AX region
non y-H2AX-RP	AGCTTCTTGCTGCTCTATG	qPCR for non γ-H2AX region
non y-H2AX-FP	GAGGACGAAACGATTGATG	qPCR for non γ-H2AX region
non y-H2AX-RP	AGATAATGAGCCACGGTAC	qPCR for non γ-H2AX region
